# Supplementary material
Source: publisher figshare collection journal article supplement (https://acs.figshare.com/ndownloader/files/3805138)
Supplement: Supplementary file 1 [file 3805138]

## Sheet: Comprehensive
Additional File 5: Comprehensive Human Milk Proteome
*Note: Each protein below was detected in at least one of the ten studies listed on the worksheet titled "Summary" and serves as a union of these studies. (1 indicates presence, 0 indicates absence) AU and MF denote author and milk fraction, respectively.
Protein name	UniProt_ID	mf:Whey	mf:Deglycosylated Whey	mf:Skim	mf:Casein	mf:MFGM	mf:Deglycosylated MFGM	mf:Whole	au:Gao	au:Hettinga	au:Liao(MFGM)-1	au:Liao(Whey)-2	au:Liao(Casein)-3	au:Zhang	au:Mange	au:Palmer	au:Picariello	au:Molinari	au:Beck
14-3-3 protein beta/alpha	1433B_HUMAN	1	0	1	0	0	0	1	1	0	0	0	0	1	1	0	0	0	1
14-3-3 protein epsilon	1433E_HUMAN	1	0	1	0	1	0	1	1	0	1	0	0	1	1	0	1	1	1
14-3-3 protein eta	1433F_HUMAN	1	0	0	0	0	0	1	1	0	0	0	0	1	0	0	0	0	1
14-3-3 protein gamma	1433G_HUMAN	1	0	1	0	0	0	1	1	0	0	0	0	1	1	0	0	1	1
14-3-3 protein sigma	1433S_HUMAN	1	0	0	0	0	0	1	1	0	0	0	0	1	0	0	0	0	1
14-3-3 protein theta	1433T_HUMAN	1	0	0	0	0	0	1	1	0	0	0	0	1	0	0	0	0	1
14-3-3 protein zeta/delta	1433Z_HUMAN	1	0	1	1	1	0	1	1	1	1	1	1	1	1	0	0	1	1
HLA class I histocompatibility antigen A-3 alpha chain	1A03_HUMAN	1	0	0	0	0	0	0	0	0	0	0	0	1	0	0	0	0	0
HLA class I histocompatibility antigen A-23 alpha chain	1A23_HUMAN	1	0	0	0	0	0	0	0	0	0	0	0	1	0	0	0	0	0
HLA class I histocompatibility antigen A-29 alpha chain	1A29_HUMAN	1	0	0	0	0	0	0	1	0	0	0	0	0	0	0	0	0	0
HLA class I histocompatibility antigen A-69 alpha chain	1A69_HUMAN	1	0	1	0	0	0	0	0	0	0	0	0	1	0	0	0	1	0
HLA class I histocompatibility antigen B-13 alpha chain	1B13_HUMAN	0	0	0	0	0	1	0	0	0	0	0	0	0	0	0	1	0	0
HLA class I histocompatibility antigen B-35 alpha chain	1B35_HUMAN	1	0	0	0	0	0	0	0	0	0	0	0	1	0	0	0	0	0
HLA class I histocompatibility antigen B-41 alpha chain	1B41_HUMAN	0	0	0	0	1	0	0	0	0	0	0	0	0	0	0	1	0	0
HLA class I histocompatibility antigen B-46 alpha chain	1B46_HUMAN	0	0	0	0	1	1	1	0	0	0	0	0	0	0	0	1	0	1
HLA class I histocompatibility antigen B-49 alpha chain	1B49_HUMAN	1	0	0	0	0	0	0	0	0	0	0	0	1	0	0	0	0	0
HLA class I histocompatibility antigen B-53 alpha chain	1B53_HUMAN	0	0	0	0	0	1	0	0	0	0	0	0	0	0	0	1	0	0
HLA class I histocompatibility antigen B-57 alpha chain	1B57_HUMAN	1	0	0	0	0	0	0	1	0	0	0	0	0	0	0	0	0	0
HLA class I histocompatibility antigen Cw-6 alpha chain	1C06_HUMAN	0	0	1	0	0	0	0	0	0	0	0	0	0	1	0	0	0	0
HLA class I histocompatibility antigen Cw-7 alpha chain	1C07_HUMAN	1	0	0	0	0	0	0	0	0	0	0	0	1	0	0	0	0	0
Serine/threonine-protein phosphatase 2A 65 kDa regulatory subunit A alpha isoform	2AAA_HUMAN	1	0	0	0	0	0	1	1	0	0	0	0	1	0	0	0	0	1
Serine/threonine-protein phosphatase 2A 55 kDa regulatory subunit B alpha isoform	2ABA_HUMAN	0	0	0	0	0	0	1	0	0	0	0	0	0	0	0	0	0	1
HLA Class II histocompatibility antigen DRB-1 beta	2B11_HUMAN	0	1	0	0	1	1	0	0	0	1	0	0	0	0	0	1	0	0
HLA class II histocompatibility antigen DRB1-8 beta	2B18_HUMAN	0	0	0	0	1	0	0	0	0	0	0	0	0	0	0	1	0	0
HLA class II histocompatibility antigen DRB1-9 beta chain	2B19_HUMAN	0	0	1	0	0	0	0	0	0	0	0	0	0	0	1	0	0	0
HLA class II histocompatibility antigen DRB1-11 beta	2B1B_HUMAN	0	1	0	0	1	1	1	0	0	0	0	0	0	0	0	1	0	1
HLA class II histocompatibility antigen DRB1-13 beta chain	2B1D_HUMAN	1	0	0	0	0	0	0	0	0	0	0	0	1	0	0	0	0	0
HLA class II histocompatibility antigen DRB1-15 beta chain	2B1F_HUMAN	1	0	0	0	1	0	0	1	0	1	0	0	0	0	0	0	0	0
HLA class II histocompatibility antigen DRB1-16 beta chain	2B1G_HUMAN	1	0	0	0	0	0	0	1	0	0	0	0	0	0	0	0	0	0
3-hydroxyisobutyrate dehydrogenase mitochondrial	3HIDH_HUMAN	1	0	0	0	0	0	1	0	0	0	0	0	1	0	0	0	0	1
4F2 cell-surface antigen heavy chain	4F2_HUMAN	1	0	1	0	1	1	1	0	0	1	0	0	1	0	0	1	1	1
5-hydroxytryptamine receptor 1A	5HT1A_HUMAN	0	0	1	0	0	0	0	0	0	0	0	0	0	1	0	0	0	0
Cytosolic purine 5'-nucleotidase	5NTC_HUMAN	1	0	0	0	0	0	0	0	0	0	0	0	1	0	0	0	0	0
6-phosphogluconate dehydrogenase decarboxylating	6PGD_HUMAN	1	0	1	0	1	1	1	1	1	0	0	0	1	1	0	1	1	1
6-phosphogluconolactonase	6PGL_HUMAN	1	0	1	0	0	0	1	1	0	0	0	0	1	1	0	0	1	1
Aldehyde dehydrogenase family 16 member A1	A16A1_HUMAN	0	0	0	0	0	0	1	0	0	0	0	0	0	0	0	0	0	1
Alpha-1-acid glycoprotein 1	A1AG1_HUMAN	1	1	1	0	1	0	1	1	1	0	1	0	1	1	1	1	1	1
Alpha-1-acid glycoprotein 2	A1AG2_HUMAN	1	0	1	0	0	0	1	1	0	0	0	0	1	1	1	1	0	1
Alpha-1-antitrypsin	A1AT_HUMAN	1	1	1	1	1	0	1	1	1	1	1	1	1	1	1	1	1	1
Alpha-1B-glycoprotein	A1BG_HUMAN	1	1	1	0	1	1	1	1	1	0	1	0	1	1	1	1	1	1
Alpha-2-antiplasmin	A2AP_HUMAN	1	0	1	0	1	0	1	1	1	0	0	0	1	0	0	0	1	1
Leucine-rich alpha-2-glycoprotein	A2GL_HUMAN	1	1	1	1	1	0	1	1	1	1	1	1	1	1	1	1	1	1
Single-chain Fv (Fragment)	A2KBC0_HUMAN	1	0	0	0	1	0	0	0	1	0	0	0	0	0	0	0	0	0
Immunoglobulin heavy variable	A2KUC3_HUMAN	1	0	0	0	1	0	0	0	1	0	0	0	0	0	0	0	0	0
Immunoglobulin lambda variable	A2KUC4_HUMAN	1	0	0	0	1	0	0	0	1	0	0	0	0	0	0	0	0	0
Alpha-2-macroglobulin	A2MG_HUMAN	1	0	1	0	1	0	1	1	1	0	0	0	1	1	0	0	0	1
Anti-folate binding protein (Fragment)	A2NYQ_HUMAN	1	0	0	0	1	0	0	0	1	0	0	0	0	0	0	0	0	0
Amyloid beta A4 protein	A4_HUMAN	1	0	1	0	0	0	1	1	0	0	1	0	1	1	1	0	1	1
Neutral amino acid transporter B(0)	AAAT_HUMAN	1	0	0	0	1	1	0	0	0	0	0	0	1	0	0	1	0	0
Acetoacetyl-CoA synthetase	AACS_HUMAN	1	0	0	0	0	0	1	0	0	0	0	0	1	0	0	0	0	1
Alpha-1-antichymotrypsin	AACT_HUMAN	1	1	1	1	1	1	1	1	1	1	1	1	1	1	1	1	1	1
AP2-associated protein kinase 1	AAK1_HUMAN	0	0	1	0	0	0	0	0	0	0	0	0	0	1	0	0	0	0
5'-AMP-activated protein kinase subunit gamma-1	AAKG1_HUMAN	1	0	0	0	0	0	0	0	0	0	0	0	1	0	0	0	0	0
Aspartate aminotransferase cytoplasmic	AATC_HUMAN	1	0	0	0	0	0	1	1	0	0	0	0	1	0	0	0	0	1
Aspartate aminotransferase mitochondrial	AATM_HUMAN	0	0	0	0	0	0	1	0	0	0	0	0	0	0	0	0	0	1
ATP-binding cassette sub-family A member 1	ABCA1_HUMAN	1	0	0	0	0	0	0	1	0	0	0	0	0	0	0	0	0	0
ATP-binding cassette sub-family A member 13	ABCAD_HUMAN	0	0	1	0	0	0	0	0	0	0	0	0	0	1	0	0	0	0
ATP-binding cassette sub-family B member 5	ABCB5_HUMAN	1	0	0	0	0	0	0	0	0	0	0	0	1	0	0	0	0	0
ATP-binding cassette sub-family B member 10 mitochondrial	ABCBA_HUMAN	0	0	1	0	0	0	0	0	0	0	0	0	0	1	0	0	0	0
ATP-binding cassette sub-family D member 3	ABCD3_HUMAN	0	0	0	0	0	0	1	0	0	0	0	0	0	0	0	0	0	1
ATP-binding cassette sub-family E member 1	ABCE1_HUMAN	1	0	0	0	0	0	1	0	0	0	0	0	1	0	0	0	0	1
ATP-binding cassette sub-family F member 1	ABCF1_HUMAN	0	0	0	0	0	0	1	0	0	0	0	0	0	0	0	0	0	1
ATP-binding cassette sub-family G member 2	ABCG2_HUMAN	1	0	1	1	1	1	1	1	1	1	0	1	1	1	0	1	0	1
Abhydrolase domain-containing protein 5	ABHD5_HUMAN	0	0	0	0	1	1	1	0	0	1	0	0	0	0	0	1	0	1
Abhydrolase domain-containing protein 14B	ABHEB_HUMAN	1	0	0	0	0	0	1	1	0	0	0	0	1	0	0	0	0	1
UPF0727 protein C6orf115	ABRAL_HUMAN	0	0	1	0	0	0	0	0	0	0	0	0	0	1	0	0	0	0
Acetyl-CoA carboxylase 1	ACACA_HUMAN	0	0	0	0	1	0	1	0	0	0	0	0	0	0	0	1	0	1
Acetyl-CoA carboxylase 2	ACACB_HUMAN	1	0	0	0	0	0	1	1	0	0	0	0	1	0	0	0	0	1
Short-chain specific acyl-CoA dehydrogenase mitochondrial	ACADS_HUMAN	0	0	1	0	0	0	0	0	0	0	0	0	0	1	0	0	0	0
Acyl-CoA-binding protein	ACBP_HUMAN	1	0	1	0	0	0	0	1	0	0	0	0	1	1	0	0	1	0
Angiotensin-converting enzyme	ACE_HUMAN	1	0	1	0	1	1	1	1	1	0	0	0	1	0	1	1	0	1
Angiotensin-converting enzyme 2	ACE2_HUMAN	1	0	0	0	1	0	1	0	1	1	0	0	1	0	0	0	0	1
ATP-citrate synthase	ACLY_HUMAN	1	0	1	0	1	0	1	1	1	0	0	0	1	1	0	0	0	1
Acyl-coenzyme A thioesterase 11	ACO11_HUMAN	1	0	0	0	0	0	0	0	0	0	0	0	1	0	0	0	0	0
Cytoplasmic aconitate hydratase	ACOC_HUMAN	1	0	1	0	1	0	1	1	0	1	0	0	1	1	0	0	1	1
Acyl-coenzyme A thioesterase 1	ACOT1_HUMAN	1	0	0	0	0	0	1	0	0	0	0	0	1	0	0	0	0	1
Peroxisomal acyl-coenzyme A oxidase 1	ACOX1_HUMAN	0	0	0	0	0	0	1	0	0	0	0	0	0	0	0	0	0	1
Peroxisomal acyl-coenzyme A oxidase 3	ACOX3_HUMAN	0	0	0	0	0	0	1	0	0	0	0	0	0	0	0	0	0	1
Acylamino-acid-releasing enzyme	ACPH_HUMAN	1	0	0	0	0	0	1	0	0	0	0	0	1	0	0	0	0	1
Acetyl-coenzyme A synthetase cytoplasmic	ACSA_HUMAN	1	0	0	0	0	0	1	0	0	0	0	0	1	0	0	0	0	1
Acyl-CoA synthetase family member 4	ACSF4_HUMAN	0	0	1	0	0	0	0	0	0	0	0	0	0	1	0	0	0	0
Long-chain-fatty-acid--CoA ligase 1	ACSL1_HUMAN	1	0	1	0	1	1	1	0	0	1	0	0	1	1	0	1	0	1
Long-chain-fatty-acid--CoA ligase 3	ACSL3_HUMAN	1	1	1	0	1	1	1	0	0	1	0	0	1	1	0	1	0	1
Long-chain-fatty-acid--CoA ligase 4	ACSL4_HUMAN	1	0	0	0	1	1	1	0	0	1	0	0	1	0	0	1	0	1
Beta-Actin cytoplasmic 1	ACTB_HUMAN	1	1	1	1	1	1	1	1	1	0	1	1	1	1	1	1	0	1
Beta-actin-like protein 2	ACTBL_HUMAN	1	0	0	1	1	0	0	0	0	1	1	1	1	0	0	0	0	0
Actin alpha cardiac muscle 1	ACTC_HUMAN	1	0	0	0	1	0	0	1	1	0	0	0	1	0	0	1	0	0
Actin cytoplasmic 2	ACTG_HUMAN	1	0	1	0	1	1	0	1	1	1	0	0	1	1	0	1	1	0
Alpha-actinin-1	ACTN1_HUMAN	1	1	1	0	1	0	0	1	1	0	0	0	1	1	1	1	0	0
Alpha-actin 2	ACTN2_HUMAN	0	1	0	0	0	0	0	0	0	0	0	0	0	0	0	1	0	0
Alpha-actinin-4	ACTN4_HUMAN	1	0	1	0	1	0	1	1	1	0	0	0	1	1	1	0	1	1
Actin alpha skeletal muscle	ACTS_HUMAN	0	0	1	0	1	0	0	0	0	1	0	0	0	1	0	0	0	0
Actin-related protein T2	ACTT2_HUMAN	0	0	1	0	0	0	0	0	0	0	0	0	0	1	0	0	0	0
Beta-centractin	ACTY_HUMAN	0	0	0	0	0	0	1	0	0	0	0	0	0	0	0	0	0	1
Alpha-centractin	ACTZ_HUMAN	1	0	0	0	0	0	1	0	0	0	0	0	1	0	0	0	0	1
Aminoacylase-1	ACY1_HUMAN	1	0	1	0	0	0	1	1	0	0	0	0	1	1	0	0	0	1
Aspartoacylase	ACY2_HUMAN	0	0	0	0	0	0	1	0	0	0	0	0	0	0	0	0	0	1
Disintegrin and metalloproteinase domain-containing protein 10	ADA10_HUMAN	1	0	0	0	0	0	1	0	0	0	0	0	1	0	0	0	0	1
Disintegrin and metalloproteinase domain-containing protein 15	ADA15_HUMAN	1	0	0	0	0	0	0	0	0	0	0	0	1	0	0	0	0	0
Disintegrin and metalloproteinase domain-containing protein 9	ADAM9_HUMAN	1	0	1	0	0	0	0	0	0	0	0	0	1	1	0	0	0	0
Alkyldihydroxyacetonephosphate synthase peroxisomal	ADAS_HUMAN	0	0	0	0	0	0	1	0	0	0	0	0	0	0	0	0	0	1
Adenylate cyclase type 3	ADCY3_HUMAN	1	0	0	0	1	1	1	0	0	0	0	0	0	0	0	1	0	1
ADAM DEC1	ADEC1_HUMAN	1	0	1	0	0	0	0	0	0	0	0	0	1	1	0	0	0	0
Alcohol dehydrogenase class-3	ADHX_HUMAN	1	0	1	0	0	0	1	0	0	0	0	0	1	1	0	0	0	1
Aldehyde oxidase	ADO_HUMAN	0	0	0	0	0	0	1	0	0	0	0	0	0	0	0	0	0	1
Proteasomal ubiquitin receptor ADRM1	ADRM1_HUMAN	0	0	0	0	0	0	1	0	0	0	0	0	0	0	0	0	0	1
Cluster of ADP/ATP translocase 2	ADT2_HUMAN	0	0	0	0	0	0	1	0	0	0	0	0	0	0	0	0	0	1
Afadin	AFAD_HUMAN	1	0	0	0	0	0	0	0	0	0	0	0	1	0	0	0	0	0
Afamin	AFAM_HUMAN	1	0	1	0	0	0	1	1	0	0	0	0	1	0	1	0	0	1
Phosphoacetylglucosamine mutase	AGM1_HUMAN	1	0	0	0	0	0	1	0	0	0	0	0	1	0	0	0	0	1
Anterior gradient protein 2 homolog	AGR2_HUMAN	1	0	0	0	0	0	0	1	0	0	0	0	1	0	0	0	0	0
Agrin	AGRIN_HUMAN	1	0	1	0	0	0	1	1	0	0	0	0	1	1	0	0	0	1
Protein AHNAK2	AHNK2_HUMAN	0	0	1	0	0	0	0	0	0	0	0	0	0	1	0	0	0	0
Activator of 90 kDa heat shock protein ATPase homolog 1	AHSA1_HUMAN	1	0	0	0	0	0	1	0	0	0	0	0	1	0	0	0	0	1
Allograft inflammatory factor 1	AIF1_HUMAN	0	0	1	0	0	0	0	0	0	0	0	0	0	1	0	0	0	0
Allograft inflammatory factor 1-like	AIF1L_HUMAN	1	0	0	0	0	0	1	1	0	0	0	0	1	0	0	0	0	1
Apoptosis-inducing factor 1 mitochondrial	AIFM1_HUMAN	0	0	1	0	0	0	0	0	0	0	0	0	0	1	0	0	0	0
Aminoacyl tRNA synthase complex-interacting multifunctional protein 1	AIMP1_HUMAN	1	0	0	0	0	0	1	1	0	0	0	0	1	0	0	0	0	1
Aminoacyl tRNA synthase complex-interacting multifunctional protein 2	AIMP2_HUMAN	1	0	0	0	0	0	1	0	0	0	0	0	1	0	0	0	0	1
Splicing factor arginine/serine-rich 17A	AK17A_HUMAN	0	0	1	0	0	0	0	0	0	0	0	0	0	1	0	0	0	0
Alcohol dehydrogenase [NADP+]	AK1A1_HUMAN	1	0	1	1	1	0	1	1	1	1	1	1	1	1	0	0	1	1
Aldo-keto reductase family 1 member C1	AK1C1_HUMAN	1	0	0	0	1	0	1	1	1	1	0	0	1	0	0	0	0	1
Aldo-keto reductase family 1 member C3	AK1C3_HUMAN	1	0	0	0	0	0	0	1	0	0	0	0	1	0	0	0	0	0
Aldo-keto reductase family 1 member C4	AK1C4_HUMAN	0	0	1	0	0	0	0	0	0	0	0	0	0	1	0	0	0	0
Retinal dehydrogenase 1	AL1A1_HUMAN	1	0	1	0	0	0	1	1	0	0	0	0	1	1	0	0	0	1
Aldehyde dehydrogenase family 1 member A3	AL1A3_HUMAN	1	0	1	0	0	0	1	0	0	0	0	0	1	1	0	0	0	1
Aldehyde dehydrogenase family 1 member L1	AL1L1_HUMAN	1	0	0	0	0	0	1	1	0	0	0	0	1	0	0	0	0	1
Alpha-aminoadipic semialdehyde dehydrogenase	AL7A1_HUMAN	1	0	1	0	0	0	1	1	0	0	0	0	1	1	0	0	1	1
4-trimethylaminobutyraldehyde dehydrogenase	AL9A1_HUMAN	1	0	1	0	1	0	1	1	1	1	0	0	1	1	0	0	0	1
Alanine aminotransferase 1	ALAT1_HUMAN	1	0	1	0	0	0	1	1	0	0	0	0	1	1	0	0	1	1
Serum albumin	ALBU_HUMAN	1	1	1	1	1	1	1	1	1	1	1	1	1	1	0	1	1	1
Fructose-bisphosphate aldolase A	ALDOA_HUMAN	1	0	1	0	1	0	1	1	1	1	1	0	1	1	0	0	1	1
Fructose-bisphosphate aldolase C	ALDOC_HUMAN	1	0	1	0	0	0	1	1	0	0	0	0	1	0	0	0	1	1
Chitobiosyldiphosphodolichol beta-mannosyltransferase	ALG1_HUMAN	0	0	0	0	0	0	1	0	0	0	0	0	0	0	0	0	0	1
Dol-P-Man:Man(7)GlcNAc(2)-PP-Dol alpha-16-mannosyltransferase	ALG12_HUMAN	0	0	0	0	0	0	1	0	0	0	0	0	0	0	0	0	0	1
Dolichyl-phosphate beta-glucosyltransferase	ALG5_HUMAN	0	0	0	0	0	0	1	0	0	0	0	0	0	0	0	0	0	1
Insulin-like growth factor-binding protein complex acid labile subunit	ALS_HUMAN	1	0	1	0	0	0	0	1	0	0	0	0	1	1	0	0	0	0
Protein AMBP	AMBP_HUMAN	1	0	1	0	0	0	1	1	0	0	0	0	1	1	1	0	0	1
Peptidyl-glycine alpha-amidating monooxygenase	AMD_HUMAN	1	0	0	0	0	0	0	1	0	0	0	0	1	0	0	0	0	0
Aminopeptidase B	AMPB_HUMAN	1	0	1	0	0	0	1	0	0	0	0	0	1	1	0	0	0	1
Cytosol aminopeptidase	AMPL_HUMAN	1	0	1	0	1	0	1	1	1	0	0	0	1	1	0	0	1	1
Methionine aminopeptidase 1	AMPM1_HUMAN	0	0	0	0	0	0	1	0	0	0	0	0	0	0	0	0	0	1
Aminopeptidase N	AMPN_HUMAN	1	0	1	0	1	0	1	1	1	0	0	0	1	1	1	0	0	1
Alpha-2-macroglobulin receptor-associated protein	AMRP_HUMAN	1	0	1	1	0	0	1	0	0	0	0	1	1	0	0	0	1	1
Alpha-amylase 1	AMY1_HUMAN	1	1	1	1	1	0	1	1	1	1	1	1	1	1	1	1	0	1
Alpha-amylase 2B	AMY2B_HUMAN	1	0	1	0	0	0	0	0	0	0	0	0	0	0	0	1	1	0
Alpha-N-acetylglucosaminidase	ANAG_HUMAN	1	0	1	0	0	0	1	1	1	0	0	0	1	1	0	0	0	1
Angiogenin	ANGI_HUMAN	1	0	0	0	1	0	1	1	1	0	0	0	1	0	0	0	0	1
Angiopoietin-related protein 4	ANGL4_HUMAN	1	0	1	0	1	0	1	1	0	1	0	0	1	1	0	0	1	1
Angiopoietin-2	ANGP2_HUMAN	1	0	0	0	0	0	0	1	0	0	0	0	0	0	0	0	0	0
Angiotensinogen	ANGT_HUMAN	1	0	1	0	0	0	1	1	1	0	0	0	1	1	1	0	0	1
Ankyrin-2	ANK2_HUMAN	0	0	1	0	0	0	0	0	0	0	0	0	0	1	0	0	0	0
Anoctamin-10	ANO10_HUMAN	0	0	0	0	0	0	1	0	0	0	0	0	0	0	0	0	0	1
Ankyrin repeat domain-containing protein 12	ANR12_HUMAN	0	0	1	0	0	0	0	0	0	0	0	0	0	1	0	0	0	0
Ankyrin repeat domain-containing protein 17	ANR17_HUMAN	0	0	0	0	0	0	1	0	0	0	0	0	0	0	0	0	0	1
Ankyrin repeat domain-containing protein 62	ANR62_HUMAN	1	0	0	0	0	0	0	1	0	0	0	0	0	0	0	0	0	0
Antithrombin-III	ANT3_HUMAN	1	0	1	0	1	0	1	1	1	1	0	0	1	1	1	0	1	1
Annexin A11	ANX11_HUMAN	0	0	0	0	0	0	1	0	0	0	0	0	0	0	0	0	0	1
Annexin A1	ANXA1_HUMAN	1	0	1	0	1	1	1	1	0	1	0	0	0	1	0	1	0	1
Annexin A2	ANXA2_HUMAN	1	0	0	0	1	0	1	1	1	1	0	0	1	0	0	1	0	1
Annexin A3	ANXA3_HUMAN	0	0	0	0	0	0	1	0	0	0	0	0	0	0	0	0	0	1
Annexin A4	ANXA4_HUMAN	0	0	0	0	0	0	1	0	0	0	0	0	0	0	0	0	0	1
Annexin A5	ANXA5_HUMAN	1	0	1	0	1	0	1	1	0	1	0	0	1	1	0	0	0	1
Annexin A6	ANXA6_HUMAN	1	0	1	0	0	0	1	0	0	0	0	0	1	1	0	0	0	1
Annexin A7	ANXA7_HUMAN	0	0	0	0	0	0	1	0	0	0	0	0	0	0	0	0	0	1
Aldehyde oxidase	AOXA_HUMAN	0	0	0	0	1	0	0	0	1	0	0	0	0	0	0	0	0	0
AP-1 complex subunit beta-1	AP1B1_HUMAN	1	0	0	0	0	0	1	0	0	0	0	0	1	0	0	0	0	1
AP-1 complex subunit gamma-1	AP1G1_HUMAN	1	0	0	0	0	0	1	0	0	0	0	0	1	0	0	0	0	1
AP-1 complex subunit mu-1	AP1M1_HUMAN	0	0	0	0	0	0	1	0	0	0	0	0	0	0	0	0	0	1
AP-1 complex subunit mu-2	AP1M2_HUMAN	0	0	0	0	0	0	1	0	0	0	0	0	0	0	0	0	0	1
AP-1 complex subunit sigma-1A	AP1S1_HUMAN	0	0	0	0	0	0	1	0	0	0	0	0	0	0	0	0	0	1
AP-2 complex subunit alpha-1	AP2A1_HUMAN	1	0	0	0	0	0	0	0	0	0	0	0	1	0	0	0	0	0
AP-2 complex subunit beta	AP2B1_HUMAN	0	0	1	0	0	0	0	0	0	0	0	0	0	1	0	0	0	0
AP-2 complex subunit mu	AP2M1_HUMAN	0	0	0	0	0	0	1	0	0	0	0	0	0	0	0	0	0	1
AP-3 complex subunit beta-1	AP3B1_HUMAN	0	0	0	0	0	0	1	0	0	0	0	0	0	0	0	0	0	1
AP-3 complex subunit sigma-1	AP3S1_HUMAN	0	0	0	0	0	0	1	0	0	0	0	0	0	0	0	0	0	1
Adenomatous polyposis coli protein	APC_HUMAN	0	0	1	0	0	0	0	0	0	0	0	0	0	1	0	0	0	0
Amyloid-like protein 2	APLP2_HUMAN	1	0	0	0	0	0	1	1	0	0	0	0	1	0	0	0	0	1
Adipocyte plasma membrane-associated protein	APMAP_HUMAN	0	0	0	0	0	0	1	0	0	0	0	0	0	0	0	0	0	1
Apolipoprotein(a)	APOA_HUMAN	1	0	0	0	0	0	0	1	0	0	0	0	0	0	0	0	0	0
Apolipoprotein A-I	APOA1_HUMAN	1	0	1	1	1	0	1	1	1	1	1	1	1	1	1	0	1	1
Apolipoprotein A-II	APOA2_HUMAN	1	0	1	0	1	0	1	1	1	1	1	0	1	1	0	0	1	1
Apolipoprotein A-IV	APOA4_HUMAN	1	0	1	0	1	0	1	1	1	1	0	0	1	1	0	0	1	1
Apolipoprotein B-100	APOB_HUMAN	1	0	1	0	1	0	1	1	1	1	0	0	1	1	0	0	1	1
Apolipoprotein B receptor	APOBR_HUMAN	1	0	0	0	0	0	0	0	0	0	0	0	1	0	0	0	0	0
Apolipoprotein C-III	APOC3_HUMAN	1	0	0	0	0	0	1	0	0	0	0	0	1	0	0	0	0	1
Apolipoprotein D	APOD_HUMAN	1	0	1	1	1	1	1	1	0	1	1	1	1	0	1	1	1	1
Apolipoprotein E	APOE_HUMAN	1	0	1	0	1	0	1	1	1	1	0	0	1	1	1	0	1	1
Apolipoprotein F	APOF_HUMAN	1	0	0	0	0	0	0	0	0	0	0	0	1	0	0	0	0	0
Beta-2-glycoprotein 1	APOH_HUMAN	1	1	1	0	1	1	1	1	1	0	0	0	1	1	1	1	0	1
Apolipoprotein M	APOM_HUMAN	1	0	0	0	0	0	1	0	0	0	0	0	1	0	0	0	0	1
Adenine phosphoribosyltransferase	APT_HUMAN	1	0	1	0	0	0	1	1	0	0	0	0	1	1	0	0	1	1
ADP-ribosylation factor-like protein 6-interacting protein 1	AR6P1_HUMAN	0	0	0	0	0	0	1	0	0	0	0	0	0	0	0	0	0	1
Actin-related protein 2/3 complex subunit 1B	ARC1B_HUMAN	1	0	1	0	0	0	1	1	0	0	0	0	1	0	0	0	1	1
ADP-ribosylation factor 1	ARF1_HUMAN	1	0	1	0	1	0	1	1	1	0	0	0	1	0	0	1	1	1
ADP-ribosylation factor 3	ARF3_HUMAN	1	0	1	0	1	0	0	0	1	0	0	0	0	1	0	0	0	0
ADP-ribosylation factor 4	ARF4_HUMAN	1	0	0	0	1	0	1	1	0	0	0	0	1	0	0	1	0	1
ADP-ribosylation factor 5	ARF5_HUMAN	1	0	1	0	0	0	1	1	0	0	0	0	0	0	0	0	1	1
ADP-ribosylation factor 6	ARF6_HUMAN	1	0	0	0	0	0	1	1	0	0	0	0	1	0	0	0	0	1
Arfaptin-1	ARFP1_HUMAN	0	0	0	0	0	0	1	0	0	0	0	0	0	0	0	0	0	1
Poly(ADP-ribose) glycohydrolase ARH3	ARHL2_HUMAN	1	0	0	0	0	0	0	0	0	0	0	0	1	0	0	0	0	0
Aflatoxin B1 aldehyde reductase member 2	ARK72_HUMAN	1	0	1	0	1	0	1	1	1	0	0	0	1	1	0	0	0	1
Aflatoxin B1 aldehyde reductase member 3	ARK73_HUMAN	0	0	0	0	0	0	1	0	0	0	0	0	0	0	0	0	0	1
ADP-ribosylation factor-like protein 1	ARL1_HUMAN	0	0	0	0	0	0	1	0	0	0	0	0	0	0	0	0	0	1
ADP-ribosylation factor-like protein	ARL3_HUMAN	1	0	0	0	1	1	1	0	0	0	0	0	1	0	0	1	0	1
ADP-ribosylation factor-like protein 4A	ARL4A_HUMAN	0	0	0	0	0	0	1	0	0	0	0	0	0	0	0	0	0	1
ADP-ribosylation factor-like protein 8A	ARL8A_HUMAN	0	0	0	0	0	0	1	0	0	0	0	0	0	0	0	0	0	1
Argininosuccinate lyase	ARLY_HUMAN	1	0	0	0	0	0	1	1	0	0	0	0	1	0	0	0	0	1
Actin-related protein 2	ARP2_HUMAN	1	0	0	0	0	0	1	1	0	0	0	0	1	0	0	0	0	1
Actin-related protein 3	ARP3_HUMAN	1	0	0	0	0	0	1	1	0	0	0	0	1	0	0	0	0	1
Actin-related protein 2/3 complex subunit 5-like protein	ARP5L_HUMAN	1	0	0	0	0	0	1	0	0	0	0	0	1	0	0	0	0	1
Actin-related protein 2/3 complex subunit 2	ARPC2_HUMAN	1	0	1	0	0	0	1	1	0	0	0	0	1	1	0	0	0	1
Actin-related protein 2/3 complex subunit 3	ARPC3_HUMAN	1	0	0	0	0	0	1	1	0	0	0	0	1	0	0	0	0	1
Actin-related protein 2/3 complex subunit 4	ARPC4_HUMAN	1	0	1	0	0	0	1	1	0	0	0	0	1	1	0	0	0	1
Actin-related protein 2/3 complex subunit 5	ARPC5_HUMAN	0	0	0	0	0	0	1	0	0	0	0	0	0	0	0	0	0	1
Beta-arrestin-1	ARRB1_HUMAN	1	0	0	0	0	0	1	0	0	0	0	0	1	0	0	0	0	1
Arylsulfatase A	ARSA_HUMAN	1	0	1	0	0	0	1	0	0	0	0	0	1	1	0	0	1	1
Acid ceramidase	ASAH1_HUMAN	1	0	0	0	0	0	1	0	0	0	0	0	1	0	0	0	0	1
Apoptosis-associated speck-like protein containing a CARD	ASC_HUMAN	1	0	0	0	0	0	1	0	0	0	0	0	1	0	0	0	0	1
L-asparaginase	ASGL1_HUMAN	1	0	0	0	0	0	0	0	0	0	0	0	1	0	0	0	0	0
Probable histone-lysine N-methyltransferase ASH1L	ASH1L_HUMAN	0	0	1	0	0	0	0	0	0	0	0	0	0	1	0	0	0	0
Sphingomyelin phosphodiesterase	ASM_HUMAN	1	0	0	0	0	0	0	0	0	0	0	0	1	0	0	0	0	0
Acid sphingomyelinase-like phosphodiesterase 3a	ASM3A_HUMAN	1	0	0	0	0	0	1	0	0	0	0	0	1	0	0	0	0	1
Acid sphingomyelinase-like phosphodiesterase 3b	ASM3B_HUMAN	0	0	1	0	1	1	1	0	0	0	0	0	1	1	1	1	1	1
ATPase ASNA1	ASNA_HUMAN	0	0	0	0	0	0	1	0	0	0	0	0	0	0	0	0	0	1
N(4)-(beta-N-acetylglucosaminyl)-L-asparaginase	ASPG_HUMAN	1	0	0	0	1	0	0	1	1	0	0	0	1	0	0	0	0	0
Aspartyl/asparaginyl beta-hydroxylase	ASPH_HUMAN	0	0	0	0	0	0	1	0	0	0	0	0	0	0	0	0	0	1
Abnormal spindle-like microcephaly-associated protein	ASPM_HUMAN	0	0	1	0	0	0	0	0	0	0	0	0	0	1	0	0	0	0
Argininosuccinate synthase	ASSY_HUMAN	1	0	0	0	0	0	0	1	0	0	0	0	0	0	0	0	0	0
Putative Polycomb group protein ASXL3	ASXL3_HUMAN	0	0	1	0	0	0	1	0	0	0	0	0	0	1	0	0	0	1
Probable cation-transporting ATPase 13A4	AT134_HUMAN	1	0	0	0	1	0	1	0	0	1	0	0	1	0	0	0	0	1
Sarcoplasmic/endoplasmic reticulum calcium ATPase 2	AT2A2_HUMAN	0	0	0	0	0	0	1	0	0	0	0	0	0	0	0	0	0	1
Plasma membrane calcium-transporting ATPase 2	AT2B2_HUMAN	1	0	0	0	1	1	1	0	0	0	0	0	0	0	0	1	0	1
Probable phospholipid-transporting ATPase IB	AT8A2_HUMAN	0	0	0	0	0	0	1	0	0	0	0	0	0	0	0	0	0	1
Cyclic AMP-dependent transcription factor ATF-6 beta	ATF6B_HUMAN	0	0	1	0	0	0	0	0	0	0	0	0	0	0	0	0	1	0
Ubiquitin-like-conjugating enzyme ATG3	ATG3_HUMAN	0	0	0	0	0	0	1	0	0	0	0	0	0	0	0	0	0	1
Ubiquitin-like modifier-activating enzyme ATG7	ATG7_HUMAN	1	0	0	0	0	0	0	0	0	0	0	0	1	0	0	0	0	0
Atlastin-1	ATLA1_HUMAN	0	0	0	0	0	0	1	0	0	0	0	0	0	0	0	0	0	1
Atlastin-3	ATLA3_HUMAN	0	0	0	0	0	0	1	0	0	0	0	0	0	0	0	0	0	1
Copper transport protein ATOX1	ATOX1_HUMAN	1	0	0	0	0	0	0	0	0	0	0	0	1	0	0	0	0	0
ATP synthase subunit d mitochondrial	ATP5H_HUMAN	0	0	0	0	0	0	1	0	0	0	0	0	0	0	0	0	0	1
Copper-transporting ATPase 1	ATP7A_HUMAN	0	0	1	0	0	0	0	0	0	0	0	0	0	1	0	0	0	0
ATP synthase subunit alpha mitochondrial	ATPA_HUMAN	0	0	0	0	0	0	1	0	0	0	0	0	0	0	0	0	0	1
ATP synthase subunit beta mitochondrial	ATPB_HUMAN	0	0	0	0	0	0	1	0	0	0	0	0	0	0	0	0	0	1
ATP synthase subunit gamma mitochondrial	ATPG_HUMAN	0	0	0	0	0	0	1	0	0	0	0	0	0	0	0	0	0	1
ATP synthase subunit f mitochondrial	ATPK_HUMAN	0	0	0	0	0	0	1	0	0	0	0	0	0	0	0	0	0	1
ATP synthase subunit O mitochondrial	ATPO_HUMAN	0	0	0	0	0	0	1	0	0	0	0	0	0	0	0	0	0	1
Attractin	ATRN_HUMAN	1	0	1	0	1	0	1	1	0	0	0	0	1	0	1	1	0	1
A disintegrin and metalloproteinase with thrombospondin motifs 1	ATS1_HUMAN	1	0	0	0	0	0	0	1	0	0	0	0	0	0	0	0	0	0
Ancient ubiquitous protein 1	AUP1_HUMAN	0	0	0	0	0	1	1	0	0	0	0	0	0	0	0	1	0	1
Putative annexin A2-like protein	AXA2L_HUMAN	0	0	1	0	0	0	0	0	0	0	0	0	0	1	0	0	0	0
Beta-2-microglobulin	B2MG_HUMAN	1	0	1	1	1	0	1	1	1	1	1	1	1	1	1	1	1	1
UDP-GlcNAc:betaGal beta-13-N-acetylglucosaminyltransferase 3	B3GN3_HUMAN	1	0	1	0	0	0	0	0	0	0	0	0	1	0	0	0	1	0
UDP-GlcNAc:betaGal beta-13-N-acetylglucosaminyltransferase 7	B3GN7_HUMAN	1	0	1	0	0	0	0	0	0	0	0	0	1	0	0	0	1	0
UDP-GlcNAc:betaGal beta-13-N-acetylglucosaminyltransferase 9	B3GN9_HUMAN	1	0	0	0	0	0	0	0	0	0	0	0	1	0	0	0	0	0
Beta-1 4-galactosyltransferase 1	B4GT1_HUMAN	1	1	1	1	1	0	1	1	1	1	1	1	1	1	1	1	1	1
Barrier-to-autointegration factor	BAF_HUMAN	0	0	0	0	0	0	1	0	0	0	0	0	0	0	0	0	0	1
Large proline-rich protein BAG6	BAG6_HUMAN	0	0	0	0	0	0	1	0	0	0	0	0	0	0	0	0	0	1
Brain-specific angiogenesis inhibitor 1-associated protein 2	BAIP2_HUMAN	1	0	1	0	0	0	1	0	0	0	0	0	1	1	0	0	0	1
BAI1-associated protein 3	BAIP3_HUMAN	0	0	0	0	0	0	1	0	0	0	0	0	0	0	0	0	0	1
B-cell receptor-associated protein 31	BAP31_HUMAN	0	0	0	0	0	0	1	0	0	0	0	0	0	0	0	0	0	1
Basigin	BASI_HUMAN	1	0	0	0	1	1	1	0	0	0	0	0	1	0	0	1	0	1
Bromodomain adjacent to zinc finger domain protein 2B	BAZ2B_HUMAN	1	0	0	0	0	0	1	1	0	0	0	0	0	0	0	0	0	1
Breakpoint cluster region protein	BCR_HUMAN	0	0	0	0	0	0	1	0	0	0	0	0	0	0	0	0	0	1
3-hydroxybutyrate dehydrogenase type 2	BDH2_HUMAN	1	0	0	0	0	0	1	0	0	0	0	0	1	0	0	0	0	1
Transcription factor TFIIIB component B'' homolog	BDP1_HUMAN	0	0	1	0	0	0	0	0	0	0	0	0	0	1	0	0	0	0
Beta-galactosidase	BGAL_HUMAN	0	0	1	0	0	0	1	0	0	0	0	0	0	1	0	0	0	1
Transforming growth factor-beta-induced protein ig-h3	BGH3_HUMAN	1	0	1	0	0	0	0	0	0	0	0	0	1	1	0	0	0	0
Beta-glucuronidase	BGLR_HUMAN	1	0	0	0	0	0	0	1	0	0	0	0	1	0	0	0	0	0
Protein bicaudal D homolog 2	BICD2_HUMAN	1	0	0	0	0	0	0	1	0	0	0	0	0	0	0	0	0	0
Brefeldin A-inhibited guanine nucleotide-exchange protein 2	BIG2_HUMAN	1	0	0	0	0	0	1	0	0	0	0	0	1	0	0	0	0	1
Myc box-dependent-interacting protein 1	BIN1_HUMAN	1	0	0	0	0	0	0	0	0	0	0	0	1	0	0	0	0	0
Baculoviral IAP repeat-containing protein 1	BIRC1_HUMAN	0	0	1	0	0	0	0	0	0	0	0	0	0	1	0	0	0	0
Baculoviral IAP repeat-containing protein 6	BIRC6_HUMAN	0	0	1	0	0	0	0	0	0	0	0	0	0	1	0	0	0	0
Basic immunoglobulin-like variable motif-containing protein	BIVM_HUMAN	0	0	1	0	0	0	0	0	0	0	0	0	0	1	0	0	0	0
Cluster of Tyrosine-protein kinase Blk	BLK_HUMAN	0	0	0	0	0	0	1	0	0	0	0	0	0	0	0	0	0	1
Flavin reductase	BLVRB_HUMAN	1	0	1	0	0	0	1	1	1	0	0	0	1	1	0	0	1	1
Bone morphogenetic protein 1	BMP1_HUMAN	1	0	1	0	0	1	0	1	0	0	0	0	1	0	0	1	1	0
Pre-miRNA 5'-monophosphate methyltransferase	BN3D2_HUMAN	0	0	0	0	0	0	1	0	0	0	0	0	0	0	0	0	0	1
Protein Plunc	BPIA1_HUMAN	0	0	1	0	0	0	0	0	0	0	0	0	0	1	0	0	0	0
3'(2')5'-bisphosphate nucleotidase 1	BPNT1_HUMAN	1	0	1	0	0	0	1	1	0	0	0	0	1	1	0	0	0	1
Nucleosome-remodeling factor subunit BPTF	BPTF_HUMAN	0	0	1	0	0	0	0	0	0	0	0	0	0	1	0	0	0	0
BRO1 domain-containing protein BROX	BROX_HUMAN	1	0	0	0	0	0	1	1	1	0	0	0	1	0	0	0	0	1
Seipin	BSCL2_HUMAN	0	0	0	0	0	1	1	0	0	0	0	0	0	0	0	1	0	1
Protein bassoon	BSN_HUMAN	0	0	1	0	0	0	0	0	0	0	0	0	0	1	0	0	0	0
B box and SPRY domain-containing protein	BSPRY_HUMAN	0	0	0	0	0	0	1	0	0	0	0	0	0	0	0	0	0	1
Brain-specific serine protease 4	BSSP4_HUMAN	1	0	0	0	0	0	0	1	0	0	0	0	1	0	0	0	0	0
Bone marrow stromal antigen 2	BST2_HUMAN	1	0	0	0	1	1	0	1	0	1	0	0	0	0	0	1	0	0
Butyrophilin subfamily 1 member A1	BT1A1_HUMAN	1	1	1	1	1	1	1	1	1	1	1	1	1	1	1	1	1	1
Transcription factor BTF3 homolog 4	BT3L4_HUMAN	1	0	0	0	0	0	0	0	0	0	0	0	1	0	0	0	0	0
Biotinidase	BTD_HUMAN	1	0	1	0	0	0	1	1	0	0	0	0	1	1	1	0	1	1
Transcription factor BTF3	BTF3_HUMAN	0	0	0	0	0	0	1	0	0	0	0	0	0	0	0	0	0	1
Basic leucine zipper and W2 domain-containing protein 1	BZW1_HUMAN	0	0	0	0	0	0	1	0	0	0	0	0	0	0	0	0	0	1
Scavenger receptor cysteine-rich type 1 protein M160	C163B_HUMAN	0	0	1	0	0	0	0	0	0	0	0	0	0	1	0	0	0	0
C1GALT1-specific chaperone 1	C1GLC_HUMAN	0	0	0	0	0	0	1	0	0	0	0	0	0	0	0	0	0	1
Complement C1q tumor necrosis factor-related protein 1	C1QT1_HUMAN	1	0	1	0	0	0	1	1	0	0	0	0	1	0	0	0	1	1
Complement C1r subcomponent	C1R_HUMAN	1	0	0	0	0	0	0	0	0	0	0	0	1	0	0	0	0	0
Complement C1r subcomponent-like protein	C1RL_HUMAN	1	0	1	0	0	0	0	1	0	0	0	0	1	0	1	0	0	0
Complement C1s subcomponent	C1S_HUMAN	1	0	0	0	0	0	0	1	0	0	0	0	1	0	0	0	0	0
C-1-tetrahydrofolate synthase cytoplasmic	C1TC_HUMAN	1	0	1	0	0	0	1	1	0	0	0	0	1	0	0	0	1	1
Coiled-coil and C2 domain-containing protein 2A	C2D2A_HUMAN	0	0	1	0	0	0	0	0	0	0	0	0	0	1	0	0	0	0
C4b-binding protein alpha chain	C4BPA_HUMAN	1	1	1	0	1	0	1	1	0	1	1	0	1	1	1	1	1	1
Cytochrome b561 domain-containing protein 2	C56D2_HUMAN	0	0	0	0	0	0	1	0	0	0	0	0	0	0	0	0	0	1
Voltage-dependent calcium channel subunit alpha-2/delta-1	CA2D1_HUMAN	1	0	0	0	1	1	1	0	0	0	0	0	1	0	0	1	0	1
Calcium-binding protein 39	CAB39_HUMAN	1	0	0	0	0	0	1	1	0	0	0	0	1	0	0	0	0	1
45 kDa calcium-binding protein	CAB45_HUMAN	1	0	1	0	1	0	1	1	0	1	0	0	1	1	0	0	1	1
Voltage-dependent T-type calcium channel subunit alpha-1I	CAC1I_HUMAN	0	0	1	0	0	0	0	0	0	0	0	0	0	1	0	0	0	0
Cadherin-1	CADH1_HUMAN	1	0	1	0	0	0	1	1	1	0	0	0	1	0	0	0	1	1
Carbonic anhydrase 2	CAH2_HUMAN	1	0	1	0	1	0	1	1	1	0	0	0	1	0	0	0	1	1
Carbonic anhydrase 6	CAH6_HUMAN	1	1	1	1	1	1	1	1	1	1	1	1	1	1	1	1	1	1
Calretinin	CALB2_HUMAN	1	0	1	0	0	0	1	1	0	0	0	0	1	1	0	0	0	1
Calmodulin-like protein 5	CALL5_HUMAN	1	0	1	0	0	0	0	1	0	0	0	0	1	0	0	0	1	0
Calmodulin	CALM_HUMAN	1	0	1	0	0	0	1	1	0	0	1	0	1	1	0	0	1	1
Calreticulin	CALR_HUMAN	1	0	1	0	1	0	1	1	0	0	1	0	1	1	1	1	1	1
Calumenin	CALU_HUMAN	1	0	1	0	0	0	1	1	0	0	0	0	1	0	0	0	1	1
Calnexin	CALX_HUMAN	1	0	0	0	0	0	1	0	0	0	0	0	1	0	0	0	0	1
Calpain-1 catalytic subunit	CAN1_HUMAN	1	0	0	0	0	0	1	0	0	0	0	0	1	0	0	0	0	1
Calcineurin subunit B type 1	CANB1_HUMAN	1	0	0	0	0	0	0	0	0	0	0	0	1	0	0	0	0	0
Cullin-associated NEDD8-dissociated protein 1	CAND1_HUMAN	1	0	0	0	0	0	1	1	0	0	0	0	1	0	0	0	0	1
Soluble calcium-activated nucleotidase 1	CANT1_HUMAN	1	0	0	0	0	0	1	1	0	0	0	0	1	0	0	0	0	1
Adenylyl cyclase-associated protein 1	CAP1_HUMAN	1	0	0	0	0	0	1	1	0	0	0	0	1	0	0	0	0	1
Macrophage-capping protein	CAPG_HUMAN	1	0	0	0	0	0	1	1	1	0	0	0	1	0	0	0	0	1
Caprin-1	CAPR1_HUMAN	1	0	0	0	0	0	0	0	0	0	0	0	1	0	0	0	0	0
Calcium-dependent secretion activator 2	CAPS2_HUMAN	1	0	0	0	0	0	0	1	0	0	0	0	0	0	0	0	0	0
F-actin-capping protein subunit beta	CAPZB_HUMAN	1	0	0	0	0	0	1	1	0	0	0	0	1	0	0	0	0	1
Alpha-S1-casein	CASA1_HUMAN	1	1	1	1	1	1	1	1	1	1	1	1	1	1	1	1	1	1
Beta-casein	CASB_HUMAN	1	1	1	1	1	1	1	1	1	1	1	1	1	1	1	1	1	1
Protein CASC4	CASC4_HUMAN	1	0	0	0	0	0	0	0	0	0	0	0	1	0	0	0	0	0
Kappa-casein	CASK_HUMAN	1	1	1	1	1	1	1	1	1	1	1	1	1	1	1	1	1	1
Caspase-3	CASP3_HUMAN	1	0	0	0	0	0	1	1	0	0	0	0	1	0	0	0	0	1
Caspase-14	CASPE_HUMAN	0	0	0	0	0	0	1	0	0	0	0	0	0	0	0	0	0	1
Catalase	CATA_HUMAN	1	0	0	0	0	0	1	1	0	0	0	0	1	0	0	0	0	1
Cathepsin B	CATB_HUMAN	1	0	1	0	1	0	1	1	1	0	0	0	1	1	0	0	1	1
Dipeptidyl peptidase 1	CATC_HUMAN	1	0	1	0	0	0	1	1	0	0	0	0	1	1	1	0	1	1
Cathepsin D	CATD_HUMAN	1	0	1	0	1	0	1	1	1	0	0	0	1	1	1	0	0	1
Cathepsin H	CATH_HUMAN	1	0	1	0	0	0	1	1	0	0	0	0	1	0	1	0	0	1
Cathepsin O	CATO_HUMAN	0	0	0	0	0	0	1	0	0	0	0	0	0	0	0	0	0	1
Cathepsin S	CATS_HUMAN	1	0	1	0	1	0	1	1	1	0	0	0	1	1	1	0	1	1
Cathepsin Z	CATZ_HUMAN	1	0	0	0	0	0	1	1	0	0	0	0	1	0	0	0	0	1
F-actin-capping protein subunit alpha-1	CAZA1_HUMAN	1	0	1	0	0	0	1	1	0	0	0	0	1	1	0	0	1	1
F-actin-capping protein subunit alpha-2	CAZA2_HUMAN	1	0	0	0	0	0	1	1	0	0	0	0	1	0	0	0	0	1
Calcium-binding protein 39-like	CB39L_HUMAN	1	0	1	0	0	0	1	1	0	0	0	0	1	1	0	0	0	1
Corticosteroid-binding globulin	CBG_HUMAN	1	0	1	0	0	0	1	1	0	0	0	0	1	1	1	0	1	1
Carboxypeptidase A4	CBPA4_HUMAN	1	0	0	0	0	0	0	1	0	0	0	0	0	0	0	0	0	0
Carboxypeptidase B	CBPB1_HUMAN	1	0	0	0	0	0	0	1	0	0	0	0	0	0	0	0	0	0
Carboxypeptidase B2	CBPB2_HUMAN	1	0	1	0	0	0	1	0	0	0	0	0	1	0	0	0	1	1
Cytosolic carboxypeptidase 4	CBPC4_HUMAN	0	0	1	0	0	0	0	0	0	0	0	0	0	1	0	0	0	0
Carboxypeptidase Q	CBPQ_HUMAN	0	0	0	0	0	0	1	0	0	0	0	0	0	0	0	0	0	1
Carboxypeptidase Z	CBPZ_HUMAN	1	0	0	0	0	0	0	0	0	0	0	0	1	0	0	0	0	0
Carbonyl reductase [NADPH] 1	CBR1_HUMAN	1	0	1	0	0	0	1	1	0	0	0	0	1	1	0	0	0	1
Carbonyl reductase [NADPH] 3	CBR3_HUMAN	1	0	1	0	0	0	1	1	0	0	0	0	0	0	0	0	1	1
Cystathionine beta-synthase	CBS_HUMAN	1	0	0	0	0	0	0	0	0	0	0	0	1	0	0	0	0	0
Coiled-coil domain-containing protein 146	CC146_HUMAN	0	0	1	0	0	0	0	0	0	0	0	0	0	1	0	0	0	0
Coiled-coil domain-containing protein 177	CC177_HUMAN	0	0	1	0	0	0	0	0	0	0	0	0	0	1	0	0	0	0
Cell cycle control protein 50A	CC50A_HUMAN	0	0	0	0	1	0	0	0	0	0	0	0	0	0	0	1	0	0
Coiled-coil domain containing protein 38	CCD38_HUMAN	0	0	1	0	0	0	0	0	0	0	0	0	0	0	0	0	1	0
Coiled-coil domain-containing protein 43	CCD43_HUMAN	0	0	1	0	0	0	0	0	0	0	0	0	0	1	0	0	0	0
Coiled-coil domain-containing protein 47	CCD47_HUMAN	0	0	0	0	0	0	1	0	0	0	0	0	0	0	0	0	0	1
Coiled-coil domain-containing protein 57	CCD57_HUMAN	1	0	1	0	0	0	0	1	0	0	0	0	0	1	0	0	0	0
C-C motif chemokine 28	CCL28_HUMAN	1	0	1	0	0	0	1	1	0	0	0	0	0	1	0	0	1	1
Cyclin-L2	CCNL2_HUMAN	0	0	1	0	0	0	0	0	0	0	0	0	0	1	0	0	0	0
Cyclin-T1	CCNT1_HUMAN	0	0	1	0	0	0	0	0	0	0	0	0	0	1	0	0	0	0
Protein FAM190A	CCSE1_HUMAN	0	0	1	0	0	0	0	0	0	0	0	0	0	1	0	0	0	0
UPF0462 protein C4orf33	CD033_HUMAN	0	0	0	0	0	0	1	0	0	0	0	0	0	0	0	0	0	1
Cell division protein kinase 11B	CD11B_HUMAN	0	0	1	0	0	0	0	0	0	0	0	0	0	1	0	0	0	0
Monocyte differentiation antigen CD14	CD14_HUMAN	1	1	1	1	1	1	1	1	1	1	1	1	1	1	1	1	1	1
CD151 antigen	CD151_HUMAN	0	0	0	0	0	0	1	0	0	0	0	0	0	0	0	0	0	1
CD2-associated protein	CD2AP_HUMAN	1	0	0	0	0	0	0	0	0	0	0	0	1	0	0	0	0	0
Myeloid cell surface antigen CD33	CD33_HUMAN	1	0	0	0	0	0	1	1	0	0	0	0	0	0	0	0	0	1
Platelet glycoprotein 4	CD36_HUMAN	1	1	1	1	1	1	1	1	1	1	0	1	1	1	1	1	1	1
Leukocyte surface antigen CD47	CD47_HUMAN	1	0	0	0	0	1	1	0	0	0	0	0	1	0	0	1	0	1
CD59 glycoprotein	CD59_HUMAN	1	1	1	0	1	1	1	1	1	1	0	0	1	1	1	1	0	1
CD5 antigen-like	CD5L_HUMAN	1	0	0	0	0	0	0	1	0	0	0	0	1	0	0	0	0	0
CD63 antigen	CD63_HUMAN	1	0	0	0	0	0	1	1	0	0	0	0	0	0	0	0	0	1
CD81 antigen	CD81_HUMAN	1	0	1	0	1	1	1	1	1	1	0	0	1	0	0	1	1	1
CD82 antigen	CD82_HUMAN	0	0	0	0	0	0	1	0	0	0	0	0	0	0	0	0	0	1
CD9 antigen	CD9_HUMAN	1	0	1	0	1	1	1	1	1	1	0	0	1	1	1	1	1	1
CD97 antigen	CD97_HUMAN	0	0	0	0	0	1	0	0	0	0	0	0	0	0	0	1	0	0
Hsp90 co-chaperone Cdc37	CDC37_HUMAN	1	0	1	0	0	0	1	0	0	0	0	0	1	0	0	0	1	1
Cell division control protein 42 homolog	CDC42_HUMAN	1	0	1	0	1	1	1	1	1	1	0	0	1	1	0	1	1	1
Cell division cycle 5-like protein	CDC5L_HUMAN	1	0	0	0	1	0	0	1	1	0	0	0	0	0	0	0	0	0
Cluster of Cyclin-dependent kinase 12	CDK12_HUMAN	0	0	0	0	0	0	1	0	0	0	0	0	0	0	0	0	0	1
Cyclin-dependent kinase inhibitor 3	CDKN3_HUMAN	0	0	0	0	1	0	0	0	0	0	0	0	0	0	0	1	0	0
Protein CDV3 homolog	CDV3_HUMAN	1	0	0	0	0	0	0	0	0	0	0	0	1	0	0	0	0	0
Uncharacterized protein KIAA0562	CE104_HUMAN	0	0	1	0	0	0	0	0	0	0	0	0	0	1	0	0	0	0
protein QN1 homologue	CE162_HUMAN	0	0	0	1	0	0	0	0	0	0	1	1	0	0	0	0	0	0
Centrosomal protein of 290 kDa	CE290_HUMAN	0	0	1	0	0	0	0	0	0	0	0	0	0	1	0	0	0	0
Centrosome-associated protein 350	CE350_HUMAN	0	0	0	0	0	0	1	0	0	0	0	0	0	0	0	0	0	1
Carcinoembryonic antigen-related cell adhesion molecule 1	CEAM1_HUMAN	0	0	0	0	1	0	1	0	0	1	0	0	0	0	0	0	0	1
Bile salt-activated lipase	CEL_HUMAN	1	1	1	1	1	1	1	1	1	1	1	1	1	1	1	1	1	1
Centromere protein F	CENPF_HUMAN	1	0	0	0	0	0	0	1	0	0	0	0	0	0	0	0	0	0
Ceramide synthase 2	CERS2_HUMAN	0	0	0	0	0	0	1	0	0	0	0	0	0	0	0	0	0	1
Ceruloplasmin	CERU_HUMAN	1	1	1	0	1	0	1	1	1	0	1	0	1	1	1	1	1	1
Uncharacterized protein C6orf15	CF015_HUMAN	1	0	1	0	0	0	1	1	0	0	0	0	1	1	0	0	0	1
Costars family protein C6orf115	CF115_HUMAN	1	0	0	0	0	0	0	0	0	0	0	0	1	0	0	0	0	0
UPF0364 protein C6orf211	CF211_HUMAN	1	0	0	0	0	0	1	0	0	0	0	0	1	0	0	0	0	1
Complement factor B	CFAB_HUMAN	1	1	1	0	1	0	1	1	1	1	0	0	1	1	1	1	1	1
Complement factor H	CFAH_HUMAN	1	0	1	0	0	0	1	1	0	0	0	0	1	1	0	0	0	1
Complement factor I	CFAI_HUMAN	1	1	1	0	1	0	1	1	1	0	0	0	1	1	1	1	0	1
Cystathionine gamma-lyase	CGL_HUMAN	1	0	0	0	0	0	1	0	0	0	0	0	1	0	0	0	0	1
Cell growth regulator with EF hand domain protein 1	CGRE1_HUMAN	1	0	0	0	0	0	0	1	0	0	0	0	1	0	0	0	0	0
10 kDa heat shock protein mitochondrial	CH10_HUMAN	1	0	0	0	0	0	0	1	0	0	0	0	1	0	0	0	0	0
Chitinase-3-like protein 1	CH3L1_HUMAN	1	1	1	1	1	0	1	1	1	1	1	1	1	1	1	1	1	1
Chitinase-3-like protein 2	CH3L2_HUMAN	1	0	1	0	0	0	1	1	0	0	0	0	1	1	1	0	0	1
60 kDa heat shock protein mitochondrial	CH60_HUMAN	1	0	0	0	0	0	1	1	0	0	0	0	1	0	0	0	0	1
Cysteine-rich hydrophobic domain 1 protein	CHIC1_HUMAN	0	0	0	0	0	0	1	0	0	0	0	0	0	0	0	0	0	1
Chitinase domain-containing protein 1	CHID1_HUMAN	1	0	0	0	0	0	1	1	0	0	0	0	1	0	0	0	0	1
Charged multivesicular body protein 1b	CHM1B_HUMAN	0	0	0	0	0	0	1	0	0	0	0	0	0	0	0	0	0	1
Charged multivesicular body protein 2a	CHM2A_HUMAN	1	0	0	0	0	0	1	1	0	0	0	0	0	0	0	0	0	1
Charged multivesicular body protein 4b	CHM4B_HUMAN	1	0	0	0	0	0	0	0	0	0	0	0	1	0	0	0	0	0
Charged multivesicular body protein 3	CHMP3_HUMAN	1	0	0	0	0	0	1	0	0	0	0	0	1	0	0	0	0	1
Charged multivesicular body protein 6	CHMP6_HUMAN	0	0	0	0	0	0	1	0	0	0	0	0	0	0	0	0	0	1
Calcineurin B homologous protein 1	CHP1_HUMAN	0	0	0	0	0	0	1	0	0	0	0	0	0	0	0	0	0	1
Calcium-regulated heat stable protein 1	CHSP1_HUMAN	1	0	0	0	0	0	1	0	0	0	0	0	1	0	0	0	0	1
Uncharacterized protein C9orf117	CI117_HUMAN	0	0	0	0	0	0	1	0	0	0	0	0	0	0	0	0	0	1
Uncharacterized protein C9orf135	CI135_HUMAN	0	0	0	0	0	0	1	0	0	0	0	0	0	0	0	0	0	1
Calcium and integrin-binding protein 1	CIB1_HUMAN	1	0	1	0	0	0	1	1	0	0	0	0	1	1	0	0	0	1
Cell death activator CIDE-A	CIDEA_HUMAN	1	0	1	0	1	1	1	1	1	1	0	0	1	1	0	1	0	1
Cell death activator CIDE-3	CIDEC_HUMAN	0	0	1	0	0	0	0	0	0	0	0	0	0	1	0	0	0	0
Cold-inducible RNA-binding protein	CIRBP_HUMAN	1	0	0	0	0	0	1	0	0	0	0	0	1	0	0	0	0	1
Citrate synthase mitochondrial	CISY_HUMAN	0	0	0	0	0	0	1	0	0	0	0	0	0	0	0	0	0	1
Ester hydrolase C11orf54	CK054_HUMAN	1	0	0	0	0	0	1	0	0	0	0	0	1	0	0	0	0	1
CDK5 regulatory subunit-associated protein 2	CK5P2_HUMAN	1	0	0	0	0	0	0	0	0	0	0	0	1	0	0	0	0	0
CDK5 regulatory subunit-associated protein 3	CK5P3_HUMAN	0	0	0	0	0	0	1	0	0	0	0	0	0	0	0	0	0	1
Cytoskeleton-associated protein 2	CKAP2_HUMAN	1	0	0	0	0	0	0	1	0	0	0	0	0	0	0	0	0	0
Cytoskeleton-associated protein 4	CKAP4_HUMAN	0	0	0	0	0	0	1	0	0	0	0	0	0	0	0	0	0	1
CKLF-like MARVEL transmembrane domain-containing protein 6	CKLF6_HUMAN	0	0	0	0	0	0	1	0	0	0	0	0	0	0	0	0	0	1
UPF0444 transmembrane protein C12orf23	CL023_HUMAN	1	0	0	0	0	0	1	1	0	0	0	0	1	0	0	0	0	1
Uncharacterized protein C12orf50	CL050_HUMAN	0	0	1	0	0	0	0	0	0	0	0	0	0	1	0	0	0	0
Transmembrane protein C12orf67	CL067_HUMAN	0	0	1	0	0	0	0	0	0	0	0	0	0	1	0	0	0	0
CLIP-associating protein 1	CLAP1_HUMAN	0	0	1	0	0	0	0	0	0	0	0	0	0	1	0	0	0	0
C-type lectin domain family 11 member A	CLC11_HUMAN	1	0	1	0	0	0	0	1	0	0	0	0	0	0	1	0	1	0
Calcium-activated chloride channel regulator 4	CLCA4_HUMAN	0	0	0	0	0	0	1	0	0	0	0	0	0	0	0	0	0	1
Chloride transport protein 6	CLCN6_HUMAN	0	0	0	0	0	0	1	0	0	0	0	0	0	0	0	0	0	1
Claudin-3	CLD3_HUMAN	0	0	0	0	0	0	1	0	0	0	0	0	0	0	0	0	0	1
Claudin-4	CLD4_HUMAN	0	0	0	0	0	1	0	0	0	0	0	0	0	0	0	1	0	0
Clathrin heavy chain 1	CLH1_HUMAN	1	0	1	0	0	0	1	0	0	0	0	0	1	1	0	0	0	1
Chloride intracellular channel protein 1	CLIC1_HUMAN	1	0	1	1	1	0	1	1	1	0	0	1	1	1	0	0	1	1
Chloride intracellular channel protein 4	CLIC4_HUMAN	1	0	0	0	0	0	1	1	0	0	0	0	1	0	0	0	0	1
CAP-Gly domain-containing linker protein 2	CLIP2_HUMAN	0	0	1	0	0	0	0	0	0	0	0	0	0	1	0	0	0	0
CAP-Gly domain-containing linker protein 3	CLIP3_HUMAN	0	0	0	0	0	0	1	0	0	0	0	0	0	0	0	0	0	1
Dual specificity protein kinase CLK3	CLK3_HUMAN	0	0	1	0	0	0	0	0	0	0	0	0	0	1	0	0	0	0
Ceroid-lipofuscinosis neuronal protein 5	CLN5_HUMAN	1	0	0	0	0	0	0	0	0	0	0	0	1	0	0	0	0	0
Clusterin	CLUS_HUMAN	1	1	1	1	1	1	1	1	1	1	1	1	1	1	1	1	1	1
Uncharacterized protein C13orf40	CM040_HUMAN	1	0	0	0	0	0	0	1	0	0	0	0	0	0	0	0	0	0
Carboxymethylenebutenolidase homolog	CMBL_HUMAN	1	0	1	0	0	0	1	0	0	0	0	0	1	1	0	0	0	1
UPF0568 protein C14orf166	CN166_HUMAN	1	0	0	0	0	0	1	0	0	0	0	0	1	0	0	0	0	1
2'3'-cyclic-nucleotide 3'-phosphodiesterase	CN37_HUMAN	1	0	0	0	1	1	1	0	0	0	0	0	1	0	0	1	0	1
Cellular nucleic acid-binding protein	CNBP_HUMAN	1	0	0	0	0	0	1	0	0	0	0	0	1	0	0	0	0	1
Condensin complex subunit 2	CND2_HUMAN	0	0	1	0	0	0	0	0	0	0	0	0	0	1	0	0	0	0
Cytosolic non-specific dipeptidase	CNDP2_HUMAN	1	0	1	1	1	0	1	1	1	1	0	1	1	1	0	0	1	1
Calponin-2	CNN2_HUMAN	1	0	0	0	0	0	0	1	0	0	0	0	1	0	0	0	0	0
Protein canopy homolog 2	CNPY2_HUMAN	1	0	0	0	0	0	1	1	0	0	0	0	1	0	0	0	0	1
UPF0552 protein C15orf38	CO038_HUMAN	1	0	0	0	0	0	0	0	0	0	0	0	1	0	0	0	0	0
Complement C2	CO2_HUMAN	1	0	1	0	0	0	1	1	0	0	0	0	1	1	0	0	1	1
Complement C3	CO3_HUMAN	1	1	1	1	1	0	1	1	1	1	1	1	1	1	1	1	1	1
Complement C4-A	CO4A_HUMAN	1	1	1	0	1	1	1	1	1	0	0	0	1	1	0	1	1	1
Collagen alpha-1(IV) chain	CO4A1_HUMAN	1	0	1	0	0	0	0	1	0	0	0	0	0	1	0	0	0	0
Collagen alpha-2(IV) chain	CO4A2_HUMAN	1	0	1	0	0	0	0	1	0	0	0	0	0	1	0	0	0	0
Collagen alpha-4(IV) chain	CO4A4_HUMAN	0	0	0	0	1	0	0	0	0	1	0	0	0	0	0	0	0	0
Complement C4-B	CO4B_HUMAN	1	0	1	1	1	0	1	1	0	1	1	1	1	1	1	1	1	1
Complement C5	CO5_HUMAN	1	0	1	0	0	0	1	1	0	0	0	0	1	0	0	0	1	1
Collagen alpha-2(V) chain	CO5A2_HUMAN	1	0	0	0	0	0	0	1	0	0	0	0	0	0	0	0	0	0
Collagen alpha-3(V) chain	CO5A3_HUMAN	0	0	1	0	0	0	0	0	0	0	0	0	0	1	0	0	0	0
Complement component C6	CO6_HUMAN	1	0	0	0	0	0	1	1	0	0	0	0	1	0	0	0	0	1
Collagen alpha-3(VI) chain	CO6A3_HUMAN	0	0	1	0	0	0	0	0	0	0	0	0	0	1	0	0	0	0
Complement component C7	CO7_HUMAN	1	0	1	0	0	0	0	1	1	0	0	0	1	1	0	0	0	0
Collagen alpha-1(VII) chain	CO7A1_HUMAN	0	0	1	0	0	0	0	0	0	0	0	0	0	1	0	0	0	0
Complement component C8 alpha chain	CO8A_HUMAN	1	0	0	0	0	0	1	1	0	0	0	0	1	0	0	0	0	1
Complement component C8 beta chain	CO8B_HUMAN	1	0	0	0	0	0	0	1	0	0	0	0	1	0	0	0	0	0
Complement component C8 gamma chain	CO8G_HUMAN	1	0	0	0	0	0	0	1	0	0	0	0	1	0	0	0	0	0
Complement component C9	CO9_HUMAN	1	0	1	0	1	0	1	1	0	1	0	0	1	1	0	0	1	1
Bifunctional coenzyme A synthase	COASY_HUMAN	1	0	0	0	0	0	1	0	0	0	0	0	1	0	0	0	0	1
Cochlin	COCH_HUMAN	1	0	0	0	1	0	1	0	1	0	0	0	1	0	0	0	0	1
Cofilin-1	COF1_HUMAN	1	0	1	0	1	0	1	1	1	1	1	0	1	1	0	1	1	1
Cofilin-2	COF2_HUMAN	1	0	0	0	0	0	0	1	0	0	0	0	0	0	0	0	0	0
COMM domain-containing protein 2	COMD2_HUMAN	1	0	0	0	0	0	0	0	1	0	0	0	0	0	0	0	0	0
COMM domain-containing protein 3	COMD3_HUMAN	0	0	0	0	0	0	1	0	0	0	0	0	0	0	0	0	0	1
Catechol O-methyltransferase	COMT_HUMAN	1	0	0	0	0	0	1	0	0	0	0	0	1	0	0	0	0	1
Collagen alpha-1(XXIV) chain	COOA1_HUMAN	0	0	0	0	1	0	0	0	0	1	0	0	0	0	0	0	0	0
Coatomer subunit alpha	COPA_HUMAN	1	0	0	0	0	0	1	0	0	0	0	0	1	0	0	0	0	1
Coatomer subunit beta	COPB_HUMAN	1	0	0	0	0	0	1	0	0	0	0	0	1	0	0	0	0	1
Coatomer subunit beta'	COPB2_HUMAN	1	0	1	0	0	0	1	0	0	0	0	0	1	1	0	0	0	1
Coatomer subunit delta	COPD_HUMAN	1	0	0	0	0	0	1	1	0	0	0	0	1	0	0	0	0	1
Coatomer subunit epsilon	COPE_HUMAN	0	0	0	0	0	0	1	0	0	0	0	0	0	0	0	0	0	1
Coatomer subunit gamma	COPG_HUMAN	1	0	0	0	0	0	0	0	0	0	0	0	1	0	0	0	0	0
Coatomer subunit gamma-1	COPG1_HUMAN	0	0	0	0	0	0	1	0	0	0	0	0	0	0	0	0	0	1
Coatomer subunit zeta-1	COPZ1_HUMAN	1	0	0	0	0	0	1	1	0	0	0	0	0	0	0	0	0	1
Coronin-1A	COR1A_HUMAN	1	0	0	0	0	0	0	0	0	0	0	0	1	0	0	0	0	0
Coronin-1B	COR1B_HUMAN	1	0	0	0	0	0	1	0	0	0	0	0	1	0	0	0	0	1
Coactosin-like protein	COTL1_HUMAN	1	0	0	0	0	0	0	0	0	0	0	0	1	0	0	0	0	0
Cytochrome c oxidase subunit 2	COX2_HUMAN	0	0	0	0	0	0	1	0	0	0	0	0	0	0	0	0	0	1
Cytochrome c oxidase subunit 4 isoform 1 mitochondrial	COX41_HUMAN	0	0	0	0	0	0	1	0	0	0	0	0	0	0	0	0	0	1
Cytochrome c oxidase subunit 6C	COX6C_HUMAN	0	0	0	0	0	0	1	0	0	0	0	0	0	0	0	0	0	1
UPF0420 protein C16orf58	CP058_HUMAN	0	0	0	0	0	0	1	0	0	0	0	0	0	0	0	0	0	1
UPF0764 protein C16orf89	CP089_HUMAN	1	0	1	0	0	0	1	1	0	0	0	0	1	0	0	0	1	1
Centrosome-associated protein CEP250	CP250_HUMAN	0	0	1	0	0	0	0	0	0	0	0	0	0	1	0	0	0	0
7-alpha-hydroxycholest-4-en-3-one 12-alpha-hydroxylase	CP8B1_HUMAN	0	0	0	0	0	0	1	0	0	0	0	0	0	0	0	0	0	1
Carboxypeptidase N subunit 2	CPN2_HUMAN	1	0	0	0	0	0	0	1	0	0	0	0	1	0	0	0	0	0
Copine-1	CPNE1_HUMAN	0	0	0	0	0	0	1	0	0	0	0	0	0	0	0	0	0	1
Cluster of Copine-3	CPNE3_HUMAN	0	0	0	0	0	0	1	0	0	0	0	0	0	0	0	0	0	1
Copine-5	CPNE5_HUMAN	1	0	0	0	0	0	0	0	0	0	1	0	0	0	0	0	0	0
Calpain small subunit 1	CPNS1_HUMAN	1	0	0	0	0	0	1	0	0	0	0	0	1	0	0	0	0	1
Cleavage and polyadenylation specificity factor subunit 5	CPSF5_HUMAN	1	0	0	0	0	0	0	1	0	0	0	0	0	0	0	0	0	0
Probable serine carboxypeptidase CPVL	CPVL_HUMAN	0	0	1	0	0	0	0	0	0	0	0	0	0	1	0	0	0	0
Protein C17orf37	CQ037_HUMAN	1	0	0	0	0	0	0	0	0	0	0	0	1	0	0	0	0	0
Calcium release-activated calcium channel	CRCM1_HUMAN	0	0	0	0	1	0	1	0	0	0	0	0	0	0	0	1	0	1
Chordin-like protein 2	CRDL2_HUMAN	1	1	1	1	1	1	1	1	1	1	1	1	1	1	0	1	1	1
Protein CREG1	CREG1_HUMAN	0	0	0	0	0	0	1	0	0	0	0	0	0	0	0	0	0	1
Cysteine-rich motor neuron 1 protein	CRIM1_HUMAN	1	0	1	0	0	0	0	1	0	0	0	0	1	0	0	0	1	0
Cysteine-rich protein 2	CRIP2_HUMAN	0	0	0	0	0	0	1	0	0	0	0	0	0	0	0	0	0	1
Cysteine-rich secretory protein-3	CRIS3_HUMAN	0	0	1	0	0	0	0	0	0	0	0	0	0	0	1	0	0	0
Adapter molecule crk	CRK_HUMAN	0	0	0	0	0	0	1	0	0	0	0	0	0	0	0	0	0	1
Crk-like protein	CRKL_HUMAN	1	0	0	0	0	0	0	0	0	0	0	0	1	0	0	0	0	0
Cysteine-rich secretory protein LCCL domain-containing 1	CRLD1_HUMAN	0	0	0	0	0	0	1	0	0	0	0	0	0	0	0	0	0	1
Rootletin	CROCC_HUMAN	0	0	0	0	0	0	1	0	0	0	0	0	0	0	0	0	0	1
C-reactive protein	CRP_HUMAN	1	0	0	0	0	0	0	1	0	0	0	0	1	0	0	0	0	0
Alpha-crystallin B chain	CRYAB_HUMAN	0	0	0	0	0	0	1	0	0	0	0	0	0	0	0	0	0	1
Lambda-crystallin homolog	CRYL1_HUMAN	1	0	0	0	0	0	1	1	0	0	0	0	1	0	0	0	0	1
UPF0556 protein C19orf10	CS010_HUMAN	1	0	0	0	0	0	1	1	0	0	0	0	1	0	0	0	0	1
Cold shock domain-containing protein E1	CSDE1_HUMAN	1	0	1	0	0	0	1	0	0	0	0	0	1	1	0	0	0	1
Macrophage colony-stimulating factor 1	CSF1_HUMAN	1	0	0	0	0	0	0	0	0	0	0	0	1	0	0	0	0	0
Granulocyte-macrophage colony-stimulating factor receptor subunit alpha	CSF2R_HUMAN	1	0	1	0	0	0	0	0	0	0	0	0	1	1	0	0	0	0
Casein kinase II subunit alpha	CSK21_HUMAN	0	0	0	0	0	0	1	0	0	0	0	0	0	0	0	0	0	1
COP9 signalosome complex subunit 1	CSN1_HUMAN	1	0	0	0	0	0	1	0	0	0	0	0	1	0	0	0	0	1
COP9 signalosome complex subunit 2	CSN2_HUMAN	1	0	0	0	0	0	1	0	0	0	0	0	1	0	0	0	0	1
COP9 signalosome complex subunit 3	CSN3_HUMAN	1	0	0	0	0	0	1	0	0	0	0	0	1	0	0	0	0	1
COP9 signalosome complex subunit 4	CSN4_HUMAN	1	0	0	0	0	0	1	0	0	0	0	0	1	0	0	0	0	1
COP9 signalosome complex subunit 5	CSN5_HUMAN	1	0	0	0	0	0	0	0	0	0	0	0	1	0	0	0	0	0
COP9 signalosome complex subunit 7a	CSN7A_HUMAN	0	0	0	0	0	0	1	0	0	0	0	0	0	0	0	0	0	1
COP9 signalosome complex subunit 8	CSN8_HUMAN	0	0	0	0	0	0	1	0	0	0	0	0	0	0	0	0	0	1
Cysteine and glycine-rich protein 1	CSRP1_HUMAN	1	0	0	0	0	0	1	0	0	0	0	0	1	0	0	0	0	1
Calsyntenin-1	CSTN1_HUMAN	1	0	1	0	0	0	0	1	0	0	0	0	1	1	0	0	0	0
Choline transporter-like protein 2	CTL2_HUMAN	0	0	1	0	0	0	1	0	0	0	0	0	0	1	0	0	0	1
Low-affinity cationic amino acid transporter 2	CTR2_HUMAN	0	0	0	0	1	1	0	0	0	0	0	0	0	0	0	1	0	0
Cullin-1	CUL1_HUMAN	0	0	0	0	0	0	1	0	0	0	0	0	0	0	0	0	0	1
Cullin-2	CUL2_HUMAN	0	0	0	0	0	0	1	0	0	0	0	0	0	0	0	0	0	1
Cullin-4A	CUL4A_HUMAN	1	0	0	0	0	0	0	0	0	0	0	0	1	0	0	0	0	0
Protein CutA	CUTA_HUMAN	1	0	1	0	0	0	0	1	0	0	0	0	1	0	0	0	1	0
Pre-mRNA-splicing factor CWC22 homolog	CWC22_HUMAN	0	0	1	0	0	0	0	0	0	0	0	0	0	1	0	0	0	0
UPF0368 protein Cxorf26	CX026_HUMAN	1	0	0	0	0	0	0	0	0	0	0	0	1	0	0	0	0	0
Cytochrome c oxidase subunit 7A2 mitochondrial	CX7A2_HUMAN	0	0	0	0	0	0	1	0	0	0	0	0	0	0	0	0	0	1
C-X-C motif chemokine 2	CXCL2_HUMAN	1	0	1	0	1	0	1	1	1	0	0	0	1	0	0	0	1	1
C-X-C motif chemokine 3	CXCL3_HUMAN	0	0	1	0	0	0	0	0	0	0	0	0	0	1	0	0	0	0
Cytochrome b561	CY561_HUMAN	0	0	0	0	0	0	1	0	0	0	0	0	0	0	0	0	0	1
Cytochrome b5	CYB5_HUMAN	1	0	1	0	0	0	1	0	0	0	0	0	1	1	0	0	0	1
Cytochrome b5 type B	CYB5B_HUMAN	0	0	0	0	0	0	1	0	0	0	0	0	0	0	0	0	0	1
Calcyclin-binding protein	CYBP_HUMAN	0	0	0	0	0	0	1	0	0	0	0	0	0	0	0	0	0	1
Cytochrome b reductase 1	CYBR1_HUMAN	1	0	0	0	0	0	1	0	0	0	0	0	1	0	0	0	0	1
Cytochrome c	CYC_HUMAN	1	0	1	0	0	0	0	1	0	0	0	0	0	1	0	0	0	0
Cytoplasmic FMR1-interacting protein 1	CYFP1_HUMAN	1	0	0	0	0	0	1	0	0	0	0	0	1	0	0	0	0	1
Cytoplasmic FMR1-interacting protein 2	CYFP2_HUMAN	0	0	0	0	0	0	1	0	0	0	0	0	0	0	0	0	0	1
Ubiquitin carboxyl-terminal hydrolase CYLD	CYLD_HUMAN	1	0	0	0	0	0	0	1	0	0	0	0	0	0	0	0	0	0
Protein CYR61	CYR61_HUMAN	1	0	0	0	0	0	0	1	0	0	0	0	0	0	0	0	0	0
Cystatin-B	CYTB_HUMAN	1	0	1	0	0	0	1	1	0	0	0	0	1	1	0	0	1	1
Cystatin-C	CYTC_HUMAN	1	1	1	0	1	0	1	1	1	1	1	0	1	1	1	1	1	1
Cystatin-M	CYTM_HUMAN	1	0	0	0	0	0	0	1	0	0	0	0	0	0	0	0	0	0
Cysteine-rich and transmembrane domain-containing protein 1	CYTM1_HUMAN	0	0	0	0	0	0	1	0	0	0	0	0	0	0	0	0	0	1
Putative ATP-dependent RNA helicase DDX11-like protein	D11L8_HUMAN	0	0	1	0	0	0	0	0	0	0	0	0	0	1	0	0	0	0
Disabled homolog 2	DAB2_HUMAN	1	0	0	0	0	0	0	0	0	0	0	0	1	0	0	0	0	0
Dachshund homolog 1	DACH1_HUMAN	0	0	0	0	0	0	1	0	0	0	0	0	0	0	0	0	0	1
Dapper homolog 1	DACT1_HUMAN	0	0	1	0	0	0	0	0	0	0	0	0	0	1	0	0	0	0
Dolichyl-diphosphooligosaccharide--protein glycosyltransferase subunit DAD1	DAD1_HUMAN	0	0	0	0	0	0	1	0	0	0	0	0	0	0	0	0	0	1
Dystroglycan	DAG1_HUMAN	1	0	1	0	0	0	1	1	1	0	0	0	1	1	1	0	1	1
Drebrin-like protein	DBNL_HUMAN	1	0	0	0	0	0	0	0	0	0	0	0	1	0	0	0	0	0
DNA-binding protein A	DBPA_HUMAN	1	0	1	0	0	0	1	0	0	0	0	0	1	0	0	0	1	1
Cytoplasmic dynein 1 intermediate chain 2	DC1I2_HUMAN	0	0	0	0	0	0	1	0	0	0	0	0	0	0	0	0	0	1
Cytoplasmic dynein 1 light intermediate chain 2	DC1L2_HUMAN	0	0	1	0	0	0	1	0	0	0	0	0	0	0	0	0	1	1
Discoidin CUB and LCCL domain-containing protein 1	DCBD1_HUMAN	0	0	1	0	0	0	0	0	0	0	0	0	0	1	0	0	0	0
Dermcidin	DCD_HUMAN	1	0	1	0	1	0	1	1	1	0	0	0	0	1	0	0	0	1
DCN1-like protein 1	DCNL1_HUMAN	0	0	0	0	0	0	1	0	0	0	0	0	0	0	0	0	0	1
Deoxycytidylate deaminase	DCTD_HUMAN	1	0	0	0	0	0	0	0	0	0	0	0	1	0	0	0	0	0
Dynactin subunit 1	DCTN1_HUMAN	1	0	0	0	0	0	1	0	0	0	0	0	1	0	0	0	0	1
Dynactin subunit 2	DCTN2_HUMAN	1	0	0	0	0	0	1	0	0	0	0	0	1	0	0	0	0	1
Dynactin subunit 3	DCTN3_HUMAN	0	0	0	0	0	0	1	0	0	0	0	0	0	0	0	0	0	1
L-xylulose reductase	DCXR_HUMAN	1	0	1	0	1	0	1	1	1	0	0	0	1	1	0	0	1	1
Cluster of ATP-dependent RNA helicase DDX19B	DD19B_HUMAN	0	0	0	0	0	0	1	0	0	0	0	0	0	0	0	0	0	1
N(G)N(G)-dimethylarginine dimethylaminohydrolase 1	DDAH1_HUMAN	1	0	1	0	0	0	1	1	0	0	0	0	1	1	0	0	1	1
N(G)N(G)-dimethylarginine dimethylaminohydrolase 2	DDAH2_HUMAN	1	0	0	0	0	0	1	0	0	0	0	0	1	0	0	0	0	1
DNA damage-binding protein 1	DDB1_HUMAN	1	0	0	0	0	0	0	0	0	0	0	0	1	0	0	0	0	0
Epithelial discoidin domain-containing receptor 1	DDR1_HUMAN	1	0	1	0	1	0	1	1	1	0	0	0	1	1	1	0	1	1
DDRGK domain-containing protein 1	DDRGK_HUMAN	0	0	0	0	0	0	1	0	0	0	0	0	0	0	0	0	0	1
ATP-dependent RNA helicase DDX1	DDX1_HUMAN	0	0	0	0	0	0	1	0	0	0	0	0	0	0	0	0	0	1
Probable ATP-dependent RNA helicase DDX23	DDX23_HUMAN	0	0	1	0	0	0	0	0	0	0	0	0	0	1	0	0	0	0
ATP-dependent RNA helicase DDX3X	DDX3X_HUMAN	1	0	0	0	0	0	1	0	0	0	0	0	1	0	0	0	0	1
ATP-dependent RNA helicase DDX54	DDX54_HUMAN	1	0	0	0	0	0	0	1	0	0	0	0	0	0	0	0	0	0
Probable ATP-dependent RNA helicase DDX6	DDX6_HUMAN	1	0	0	0	0	0	1	0	0	0	0	0	1	0	0	0	0	1
24-dienoyl-CoA reductase mitochondrial	DECR_HUMAN	0	0	0	0	0	0	1	0	0	0	0	0	0	0	0	0	0	1
Neutrophil defensin 1	DEF1_HUMAN	1	0	1	0	1	0	0	1	0	1	0	0	1	1	1	0	0	0
Neutrophil defensin 3	DEF3_HUMAN	0	0	1	0	1	0	1	0	1	0	0	0	0	1	0	0	0	1
DENN domain-containing protein 4B	DEN4B_HUMAN	0	0	1	0	0	0	0	0	0	0	0	0	0	1	0	0	0	0
DENN domain-containing protein 4C	DEN4C_HUMAN	0	0	1	0	0	0	0	0	0	0	0	0	0	1	0	0	0	0
Density-regulated protein	DENR_HUMAN	1	0	0	0	0	0	1	0	0	0	0	0	1	0	0	0	0	1
Putative deoxyribose-phosphate aldolase	DEOC_HUMAN	0	0	0	0	0	0	1	0	0	0	0	0	0	0	0	0	0	1
DEP domain-containing protein 1B	DEP1B_HUMAN	1	0	0	0	0	0	0	1	0	0	0	0	0	0	0	0	0	0
DEP domain-containing protein 5	DEPD5_HUMAN	0	0	1	0	0	0	0	0	0	0	0	0	0	1	0	0	0	0
Derlin-1	DERL1_HUMAN	0	0	0	0	0	0	1	0	0	0	0	0	0	0	0	0	0	1
Desmoplakin	DESP_HUMAN	1	0	1	0	0	0	1	1	0	0	0	0	0	1	0	0	0	1
Destrin	DEST_HUMAN	1	0	1	0	0	0	1	1	0	0	0	0	1	1	0	0	1	1
Diacylglycerol kinase eta	DGKH_HUMAN	0	0	1	0	0	0	0	0	0	0	0	0	0	1	0	0	0	0
Bifunctional ATP-dependent dihydroxyacetone kinase/FAD-AMP lyase (cyclizing)	DHAK_HUMAN	1	0	0	0	0	0	1	0	0	0	0	0	1	0	0	0	0	1
Estradiol 17-beta-dehydrogenase 12	DHB12_HUMAN	0	0	0	0	0	0	1	0	0	0	0	0	0	0	0	0	0	1
Peroxisomal multifunctional enzyme type 2	DHB4_HUMAN	1	0	0	0	0	0	1	1	0	0	0	0	1	0	0	1	0	1
3-Keto-steroid reductase	DHB7_HUMAN	0	0	0	0	1	1	1	0	0	0	0	0	0	0	0	1	0	1
7-dehydrocholesterol reductase	DHCR7_HUMAN	0	0	0	0	0	0	1	0	0	0	0	0	0	0	0	0	0	1
Dihydropteridine reductase	DHPR_HUMAN	1	0	0	0	0	0	1	1	0	0	0	0	1	0	0	0	0	1
Dehydrogenase/reductase SDR family member 11	DHR11_HUMAN	0	0	0	0	0	0	1	0	0	0	0	0	0	0	0	0	0	1
Dehydrogenase/reductase SDR family member 1	DHRS1_HUMAN	0	0	0	0	1	1	1	0	0	1	0	0	0	0	0	1	0	1
Dehydrogenase/reductase SDR family member 4	DHRS4_HUMAN	0	0	0	0	0	0	1	0	0	0	0	0	0	0	0	0	0	1
Dehydrogenase/reductase SDR family member 7	DHRS7_HUMAN	0	0	0	0	0	0	1	0	0	0	0	0	0	0	0	0	0	1
Dehydrogenase/reductase SDR family member on chromosome X	DHRSX_HUMAN	0	0	0	0	1	0	0	0	0	0	0	0	0	0	0	1	0	0
Succinate dehydrogenase [ubiquinone] flavoprotein subunit mitochondrial	DHSA_HUMAN	0	0	0	0	0	0	1	0	0	0	0	0	0	0	0	0	0	1
ATP-dependent RNA helicase DHX29	DHX29_HUMAN	0	0	1	0	0	0	0	0	0	0	0	0	0	1	0	0	0	0
Di-N-acetylchitobiase	DIAC_HUMAN	1	0	1	0	0	0	1	1	0	0	0	0	1	1	1	0	0	1
Protein diaphanous homolog 1	DIAP1_HUMAN	1	0	0	0	0	0	0	0	0	0	0	0	1	0	0	0	0	0
DnaJ homolog subfamily B member 11	DJB11_HUMAN	0	0	0	0	0	0	1	0	0	0	0	0	0	0	0	0	0	1
DnaJ homolog subfamily B member 12	DJB12_HUMAN	0	0	0	0	0	0	1	0	0	0	0	0	0	0	0	0	0	1
Disks large-associated protein 2	DLGP2_HUMAN	0	0	1	0	0	0	0	0	0	0	0	0	0	1	0	0	0	0
Disks large-associated protein 4	DLGP4_HUMAN	1	0	0	0	0	0	0	0	0	0	0	0	1	0	0	0	0	0
Disks large-associated protein 5	DLGP5_HUMAN	1	0	0	0	0	0	0	1	0	0	0	0	0	0	0	0	0	0
Delta-like protein 1	DLL1_HUMAN	0	0	0	0	0	0	1	0	0	0	0	0	0	0	0	0	0	1
Deleted in malignant brain tumors 1 protein	DMBT1_HUMAN	0	0	1	0	0	0	0	0	0	0	0	0	0	1	0	0	0	0
Dystrophin	DMD_HUMAN	1	0	1	0	0	0	0	1	0	0	0	0	0	1	0	0	0	0
Delta and Notch-like epidermal growth factor-related receptor	DNER_HUMAN	1	0	0	0	0	0	0	0	0	0	0	0	1	0	0	0	0	0
DnaJ homolog subfamily A member 1	DNJA1_HUMAN	0	0	0	0	0	0	1	0	0	0	0	0	0	0	0	0	0	1
DnaJ homolog subfamily A member 2	DNJA2_HUMAN	0	0	0	0	0	0	1	0	0	0	0	0	0	0	0	0	0	1
DnaJ homolog subfamily B member 1	DNJB1_HUMAN	0	0	0	0	0	0	1	0	0	0	0	0	0	0	0	0	0	1
DnaJ homolog subfamily B member 2	DNJB2_HUMAN	1	0	0	0	0	0	0	0	0	0	0	0	1	0	0	0	0	0
DnaJ homolog subfamily B member 6	DNJB6_HUMAN	0	0	0	0	0	0	1	0	0	0	0	0	0	0	0	0	0	1
DnaJ homolog subfamily C member 3	DNJC3_HUMAN	1	0	0	0	0	0	1	1	0	0	0	0	1	0	0	0	0	1
DnaJ homolog subfamily C member 5	DNJC5_HUMAN	0	0	0	0	0	0	1	0	0	0	0	0	0	0	0	0	0	1
DNA ligase 1	DNLI1_HUMAN	1	0	0	0	0	0	0	0	0	0	0	0	1	0	0	0	0	0
Aspartyl aminopeptidase	DNPEP_HUMAN	0	0	0	0	0	0	1	0	0	0	0	0	0	0	0	0	0	1
2'-deoxynucleoside 5'-phosphate N-hydrolase 1	DNPH1_HUMAN	0	0	0	0	0	0	1	0	0	0	0	0	0	0	0	0	0	1
Deoxyribonuclease-2-alpha	DNS2A_HUMAN	1	0	0	0	0	0	1	1	0	0	0	0	1	0	0	0	0	1
D-dopachrome decarboxylase	DOPD_HUMAN	1	0	1	0	0	0	1	1	1	0	0	0	1	0	0	0	1	1
Histone-lysine N-methyltransferase H3 lysine-79 specific	DOT1L_HUMAN	1	0	0	0	0	0	0	1	0	0	0	0	0	0	0	0	0	0
DCC-interacting protein 13-alpha	DP13A_HUMAN	0	0	0	0	0	0	1	0	0	0	0	0	0	0	0	0	0	1
HLA class II histocompatibility antigen DP alpha 1 chain	DPA1_HUMAN	1	0	0	0	0	1	0	0	0	0	0	0	1	0	0	1	0	0
Dolichol-phosphate mannosyltransferase	DPM1_HUMAN	0	0	0	0	0	0	1	0	0	0	0	0	0	0	0	0	0	1
Dolichol-phosphate mannosyltransferase subunit 3	DPM3_HUMAN	1	0	1	0	0	0	1	1	0	0	0	0	1	1	0	0	0	1
DNA polymerase epsilon catalytic subunit A	DPOE1_HUMAN	0	0	1	0	0	0	0	0	0	0	0	0	0	1	0	0	0	0
DNA polymerase theta	DPOLQ_HUMAN	0	0	1	0	0	0	0	0	0	0	0	0	0	1	0	0	0	0
Dipeptidyl peptidase 2	DPP2_HUMAN	1	0	1	0	0	0	1	1	0	0	0	0	1	1	0	0	0	1
Dipeptidyl peptidase 3	DPP3_HUMAN	1	0	0	0	0	0	1	1	0	0	0	0	1	0	0	0	0	1
Dihydropyrimidinase-related protein 2	DPYL2_HUMAN	1	0	1	0	0	0	1	1	0	0	0	0	1	1	0	0	1	1
Dihydropyrimidinase-related protein 3	DPYL3_HUMAN	1	0	1	0	1	1	0	1	0	1	0	0	1	1	0	1	1	0
HLA class II histocompatibility antigen DR alpha chain	DRA_HUMAN	1	0	1	0	1	1	1	1	0	1	0	0	1	1	0	1	1	1
HLA class II histocompatibility antigen DR beta 5 chain	DRB5_HUMAN	0	0	0	0	1	0	0	0	0	1	0	0	0	0	0	0	0	0
Developmentally-regulated GTP-binding protein 1	DRG1_HUMAN	1	0	1	0	0	0	1	0	0	0	0	0	1	1	0	0	0	1
Developmentally-regulated GTP-binding protein 2	DRG2_HUMAN	1	0	0	0	0	0	1	0	0	0	0	0	1	0	0	0	0	1
Dehydrogenase/reductase SDR family member 7B	DRS7B_HUMAN	0	0	0	0	0	0	1	0	0	0	0	0	0	0	0	0	0	1
Desmocollin-1	DSC1_HUMAN	0	0	1	0	0	0	1	0	0	0	0	0	0	1	0	0	0	1
Desmocollin-2	DSC2_HUMAN	1	0	1	0	0	0	1	1	0	0	0	0	1	1	0	0	0	1
Down syndrome cell adhesion molecule	DSCAM_HUMAN	0	0	1	0	0	0	0	0	0	0	0	0	0	1	0	0	0	0
Desmoglein-1	DSG1_HUMAN	0	0	0	0	0	0	1	0	0	0	0	0	0	0	0	0	0	1
Dual specificity protein phosphatase 3	DUS3_HUMAN	0	0	0	0	0	0	1	0	0	0	0	0	0	0	0	0	0	1
Dynein heavy chain 10 axonemal	DYH10_HUMAN	0	0	1	0	0	0	0	0	0	0	0	0	0	1	0	0	0	0
Dynein heavy chain 14 axonemal	DYH14_HUMAN	1	0	1	0	0	0	0	1	0	0	0	0	0	1	0	0	0	0
Dynein heavy chain 2 axonemal	DYH2_HUMAN	1	0	0	0	0	0	0	1	0	0	0	0	0	0	0	0	0	0
Dynein heavy chain 3 axonemal	DYH3_HUMAN	1	0	0	0	0	0	0	1	0	0	0	0	0	0	0	0	0	0
Dynein heavy chain 5 axonemal	DYH5_HUMAN	1	0	1	0	0	0	0	1	0	0	0	0	0	1	0	0	0	0
Dynein heavy chain 6 axonemal	DYH6_HUMAN	0	0	1	0	0	0	0	0	0	0	0	0	0	1	0	0	0	0
Dynein heavy chain 7 axonemal	DYH7_HUMAN	0	0	1	0	0	0	0	0	0	0	0	0	0	1	0	0	0	0
Dynein heavy chain 9 axonemal	DYH9_HUMAN	1	0	1	0	0	0	0	1	0	0	0	0	0	1	0	0	0	0
Cytoplasmic dynein 1 heavy chain 1	DYHC1_HUMAN	1	0	1	0	0	0	1	1	0	0	0	0	1	1	0	0	0	1
Cytoplasmic dynein 2 heavy chain 1	DYHC2_HUMAN	0	0	1	0	0	0	0	0	0	0	0	0	0	1	0	0	0	0
Dynein light chain 1 cytoplasmic	DYL1_HUMAN	1	0	0	0	0	0	1	1	0	0	0	0	0	0	0	0	0	1
Dynein light chain 2 cytoplasmic	DYL2_HUMAN	1	0	0	0	0	0	0	0	0	0	0	0	1	0	0	0	0	0
Dynein light chain Tctex-type 1	DYLT1_HUMAN	0	0	0	0	0	0	1	0	0	0	0	0	0	0	0	0	0	1
Bullous pemphigoid antigen 1	DYST_HUMAN	0	0	1	0	0	0	0	0	0	0	0	0	0	1	0	0	0	0
Excitatory amino acid transporter 4	EAA4_HUMAN	0	1	0	0	0	0	0	0	0	0	0	0	0	0	0	1	0	0
3-beta-hydroxysteroid-Delta(8)Delta(7)-isomerase	EBP_HUMAN	0	0	0	0	0	0	1	0	0	0	0	0	0	0	0	0	0	1
Delta(35)-Delta(24)-dienoyl-CoA isomerase mitochondrial	ECH1_HUMAN	1	0	0	0	0	0	1	0	0	0	0	0	1	0	0	0	0	1
Trifunctional enzyme subunit alpha mitochondrial	ECHA_HUMAN	0	0	0	0	0	0	1	0	0	0	0	0	0	0	0	0	0	1
Trifunctional enzyme subunit beta mitochondrial	ECHB_HUMAN	0	0	0	0	0	0	1	0	0	0	0	0	0	0	0	0	0	1
Enoyl-CoA hydratase domain-containing protein 1	ECHD1_HUMAN	1	0	1	0	0	0	1	0	0	0	0	0	1	0	0	0	1	1
Peroxisomal bifunctional enzyme	ECHP_HUMAN	0	0	0	0	0	0	1	0	0	0	0	0	0	0	0	0	0	1
Enoyl-CoA delta isomerase 1 mitochondrial	ECI1_HUMAN	0	0	0	0	0	0	1	0	0	0	0	0	0	0	0	0	0	1
Extracellular matrix protein 1	ECM1_HUMAN	1	0	0	0	0	0	0	0	0	0	0	0	1	0	0	0	0	0
Extracellular matrix protein 2	ECM2_HUMAN	1	0	0	0	0	0	0	0	0	0	0	0	1	0	0	0	0	0
Proteasome-associated protein ECM29 homolog	ECM29_HUMAN	1	0	0	0	0	0	1	1	0	0	0	0	1	0	0	0	0	1
Eosinophil cationic protein	ECP_HUMAN	0	0	1	0	0	0	0	0	0	0	0	0	0	0	0	0	1	0
Endothelial differentiation-related factor 1	EDF1_HUMAN	0	0	0	0	0	0	1	0	0	0	0	0	0	0	0	0	0	1
Early endosome antigen 1	EEA1_HUMAN	1	0	0	0	0	1	0	1	0	0	0	0	1	0	0	1	0	0
Elongation factor 1-alpha 1	EF1A1_HUMAN	1	1	0	0	1	1	1	1	1	1	0	0	1	0	0	1	0	1
Elongation factor 1 -alpha 2	EF1A2_HUMAN	1	1	0	0	0	0	1	0	0	0	0	0	0	0	0	1	0	1
Putative elongation factor 1-alpha-like 3	EF1A3_HUMAN	0	0	1	0	0	0	0	0	0	0	0	0	0	1	0	0	1	0
Elongation factor 1-beta	EF1B_HUMAN	1	0	1	0	0	0	1	0	0	0	0	0	1	0	0	0	1	1
Elongation factor 1-delta	EF1D_HUMAN	1	0	0	0	0	0	1	1	0	0	0	0	1	0	0	0	0	1
Elongation factor 1-gamma	EF1G_HUMAN	1	0	1	0	0	0	1	1	0	0	0	0	1	1	0	0	1	1
Elongation factor 2	EF2_HUMAN	1	0	1	0	1	1	1	1	1	1	0	0	1	1	0	1	1	1
Eukaryotic elongation factor 2 kinase	EF2K_HUMAN	0	0	1	0	0	0	0	0	0	0	0	0	0	1	0	0	0	0
EF-hand domain-containing protein D1	EFHD1_HUMAN	1	0	1	0	0	0	1	1	0	0	0	0	1	1	0	0	0	1
EF-hand domain-containing protein D2	EFHD2_HUMAN	1	0	0	0	0	0	0	0	0	0	0	0	1	0	0	0	0	0
Ephrin-A1	EFNA1_HUMAN	1	0	1	0	0	0	0	1	0	0	0	0	0	1	0	0	0	0
Protein EFR3 homolog B	EFR3B_HUMAN	0	0	1	0	0	0	0	0	0	0	0	0	0	1	0	0	0	0
Elongation factor Tu mitochondrial	EFTU_HUMAN	0	0	0	0	0	0	1	0	0	0	0	0	0	0	0	0	0	1
Pro-epidermal growth factor	EGF_HUMAN	1	0	1	0	1	0	1	1	1	0	1	0	1	0	1	0	1	1
Epidermal growth factor receptor	EGFR_HUMAN	0	0	0	0	0	0	1	0	0	0	0	0	0	0	0	0	0	1
Endoglin	EGLN_HUMAN	1	0	0	0	1	1	0	0	0	0	0	0	1	0	0	1	0	0
EH domain-containing protein 1	EHD1_HUMAN	0	0	1	0	0	0	0	0	0	0	0	0	0	1	0	0	0	0
EH domain-containing protein 4	EHD4_HUMAN	1	0	0	0	0	0	1	0	0	0	0	0	1	0	0	0	0	1
Translation initiation factor eIF-2B subunit alpha	EI2BA_HUMAN	0	0	0	0	0	0	1	0	0	0	0	0	0	0	0	0	0	1
Translation initiation factor eIF-2B subunit beta	EI2BB_HUMAN	0	0	0	0	0	0	1	0	0	0	0	0	0	0	0	0	0	1
Translation initiation factor eIF-2B subunit delta	EI2BD_HUMAN	0	0	0	0	0	0	1	0	0	0	0	0	0	0	0	0	0	1
Translation initiation factor eIF-2B subunit epsilon	EI2BE_HUMAN	1	0	0	0	0	0	0	0	0	0	0	0	1	0	0	0	0	0
Translation initiation factor eIF-2B subunit gamma	EI2BG_HUMAN	0	0	0	0	0	0	1	0	0	0	0	0	0	0	0	0	0	1
Eukaryotic translation initiation factor 1	EIF1_HUMAN	1	0	0	0	0	0	1	0	0	0	0	0	1	0	0	0	0	1
Eukaryotic translation initiation factor 2A	EIF2A_HUMAN	1	0	0	0	0	0	0	0	0	0	0	0	1	0	0	0	0	0
Eukaryotic translation initiation factor 3 subunit A	EIF3A_HUMAN	1	0	1	0	0	0	1	0	0	0	0	0	1	1	0	0	0	1
Eukaryotic translation initiation factor 3 subunit B	EIF3B_HUMAN	0	0	1	0	0	0	1	0	0	0	0	0	0	1	0	0	0	1
Eukaryotic translation initiation factor 3 subunit C	EIF3C_HUMAN	1	0	1	0	0	0	1	0	0	0	0	0	1	1	0	0	0	1
Eukaryotic translation initiation factor 3 subunit D	EIF3D_HUMAN	0	0	1	0	0	0	1	0	0	0	0	0	0	1	0	0	0	1
Eukaryotic translation initiation factor 3 subunit E	EIF3E_HUMAN	0	0	0	0	0	0	1	0	0	0	0	0	0	0	0	0	0	1
Eukaryotic translation initiation factor 3 subunit F	EIF3F_HUMAN	1	0	0	0	0	0	1	0	0	0	0	0	1	0	0	0	0	1
Eukaryotic translation initiation factor 3 subunit G	EIF3G_HUMAN	0	0	0	0	0	0	1	0	0	0	0	0	0	0	0	0	0	1
Eukaryotic translation initiation factor 3 subunit H	EIF3H_HUMAN	1	0	0	0	0	0	1	0	0	0	0	0	1	0	0	0	0	1
Eukaryotic translation initiation factor 3 subunit I	EIF3I_HUMAN	1	0	0	0	0	0	1	0	0	0	0	0	1	0	0	0	0	1
Eukaryotic translation initiation factor 3 subunit J	EIF3J_HUMAN	1	0	0	0	0	0	1	0	0	0	0	0	1	0	0	0	0	1
Eukaryotic translation initiation factor 3 subunit K	EIF3K_HUMAN	0	0	0	0	0	0	1	0	0	0	0	0	0	0	0	0	0	1
Eukaryotic translation initiation factor 3 subunit L	EIF3L_HUMAN	1	0	0	0	0	0	1	0	0	0	0	0	1	0	0	0	0	1
Eukaryotic translation initiation factor 3 subunit M	EIF3M_HUMAN	1	0	0	0	0	0	1	1	0	0	0	0	0	0	0	0	0	1
ELAV-like protein 1	ELAV1_HUMAN	0	0	0	0	0	0	1	0	0	0	0	0	0	0	0	0	0	1
ELMO domain-containing protein 2	ELMD2_HUMAN	0	0	0	0	0	0	1	0	0	0	0	0	0	0	0	0	0	1
Transcription elongation factor B polypeptide 1	ELOC_HUMAN	1	1	0	0	0	0	0	0	0	0	0	0	1	0	0	1	0	0
Elongation of very long chain fatty acids protein 1	ELOV1_HUMAN	0	0	0	0	0	0	1	0	0	0	0	0	0	0	0	0	0	1
Echinoderm microtubule-associated protein-like 1	EMAL1_HUMAN	1	0	0	0	0	0	0	1	0	0	0	0	0	0	0	0	0	0
Echinoderm microtubule-associated protein-like 2	EMAL2_HUMAN	1	0	0	0	0	0	1	0	0	0	0	0	1	0	0	0	0	1
ER membrane protein complex subunit 2	EMC2_HUMAN	0	0	0	0	0	0	1	0	0	0	0	0	0	0	0	0	0	1
ER membrane protein complex subunit 4	EMC4_HUMAN	0	0	0	0	0	0	1	0	0	0	0	0	0	0	0	0	0	1
ER membrane protein complex subunit 8	EMC8_HUMAN	0	0	0	0	0	0	1	0	0	0	0	0	0	0	0	0	0	1
EGF-like module-containing mucin-like hormone receptor-like 2	EMR2_HUMAN	0	0	0	0	0	1	0	0	0	0	0	0	0	0	0	1	0	0
Alpha-enolase	ENOA_HUMAN	1	0	1	1	1	0	1	1	1	1	1	1	1	1	1	0	1	1
Beta-enolase	ENOB_HUMAN	1	0	0	0	0	0	1	0	0	0	0	0	0	0	0	1	0	1
Mitochondrial enolase superfamily member 1	ENOF1_HUMAN	1	0	0	0	0	0	0	0	0	0	0	0	1	0	0	0	0	0
Gamma-enolase	ENOG_HUMAN	0	0	0	0	0	0	1	0	0	0	0	0	0	0	0	0	0	1
Enolase-phosphatase E1	ENOPH_HUMAN	1	0	0	0	0	0	1	1	0	0	0	0	1	0	0	0	0	1
Ecto-NOX disulfide-thiol exchanger 1	ENOX1_HUMAN	0	0	0	0	0	0	1	0	0	0	0	0	0	0	0	0	0	1
Endoplasmin	ENPL_HUMAN	1	0	1	1	1	0	1	1	1	1	0	1	1	1	0	0	0	1
Alpha-endosulfine	ENSA_HUMAN	1	0	0	0	0	0	0	0	0	0	0	0	1	0	0	0	0	0
Ectonucleoside triphosphate diphosphohydrolase 3	ENTP3_HUMAN	1	0	0	0	1	1	1	0	0	0	0	0	1	0	0	1	0	1
Ephrin type-A receptor 7	EPHA7_HUMAN	1	0	0	0	0	0	1	1	0	0	0	0	1	0	0	0	0	1
Epiplakin	EPIPL_HUMAN	1	0	1	0	0	0	1	0	0	0	0	0	1	1	0	0	0	1
Endoplasmic reticulum aminopeptidase 1	ERAP1_HUMAN	1	0	1	0	0	0	1	1	0	0	0	0	1	0	1	0	0	1
DNA excision repair protein ERCC-6-like	ERC6L_HUMAN	0	0	1	0	0	0	0	0	0	0	0	0	0	1	0	0	0	0
Eukaryotic peptide chain release factor subunit 1	ERF1_HUMAN	0	0	1	0	0	0	1	0	0	0	0	0	0	0	0	0	1	1
Eukaryotic peptide chain release factor GTP-binding subunit ERF3A	ERF3A_HUMAN	1	0	0	0	0	0	1	0	0	0	0	0	1	0	0	0	0	1
Probable ergosterol biosynthetic protein 28	ERG28_HUMAN	0	0	0	0	0	0	1	0	0	0	0	0	0	0	0	0	0	1
Lanosterol synthase	ERG7_HUMAN	1	1	1	0	1	1	1	0	1	1	0	0	1	1	0	1	0	1
Endoplasmic reticulum-Golgi intermediate compartment protein 1	ERGI1_HUMAN	0	0	0	0	0	0	1	0	0	0	0	0	0	0	0	0	0	1
Erlin-2	ERLN2_HUMAN	0	0	0	0	0	0	1	0	0	0	0	0	0	0	0	0	0	1
Cluster of ERO1-like protein alpha	ERO1A_HUMAN	0	0	0	0	0	0	1	0	0	0	0	0	0	0	0	0	0	1
Endoplasmic reticulum resident protein 29	ERP29_HUMAN	1	0	0	0	0	0	1	1	0	0	0	0	1	0	0	0	0	1
Endoplasmic reticulum resident protein 44	ERP44_HUMAN	1	0	0	0	0	0	1	0	0	0	0	0	1	0	0	0	0	1
Epidermal growth factor receptor kinase substrate 8-like protein 2	ES8L2_HUMAN	1	0	0	0	0	0	1	0	0	0	0	0	1	0	0	0	0	1
Separin	ESPL1_HUMAN	0	0	0	0	0	0	1	0	0	0	0	0	0	0	0	0	0	1
Carboxylesterase 3	EST3_HUMAN	1	0	1	0	0	0	1	0	0	0	0	0	1	1	0	0	0	1
Carboxylesterase 4A	EST4A_HUMAN	1	0	0	0	0	0	0	0	0	0	0	0	1	0	0	0	0	0
S-formylglutathione hydrolase	ESTD_HUMAN	1	0	0	0	0	0	1	1	0	0	0	0	1	0	0	0	0	1
Extended synaptotagmin-1	ESYT1_HUMAN	0	0	0	0	0	0	1	0	0	0	0	0	0	0	0	0	0	1
Electron transfer flavoprotein subunit alpha mitochondrial	ETFA_HUMAN	0	0	0	0	0	0	1	0	0	0	0	0	0	0	0	0	0	1
Electron transfer flavoprotein subunit beta	ETFB_HUMAN	0	0	0	0	0	0	1	0	0	0	0	0	0	0	0	0	0	1
Protein ETHE1 mitochondrial	ETHE1_HUMAN	0	0	0	0	0	0	1	0	0	0	0	0	0	0	0	0	0	1
Ellis-van Creveld syndrome protein	EVC_HUMAN	1	0	0	0	0	0	0	0	0	0	0	0	1	0	0	0	0	0
Ezrin	EZRI_HUMAN	1	0	1	0	1	0	1	1	1	1	0	0	1	1	1	1	1	1
Protein FAM107B	F107B_HUMAN	1	0	0	0	0	0	0	0	0	0	0	0	1	0	0	0	0	0
Hsc70-interacting protein	F10A1_HUMAN	1	0	0	0	0	0	0	0	0	0	0	0	1	0	0	0	0	0
Putative protein FAM10A5	F10A5_HUMAN	0	0	0	0	0	0	1	0	0	0	0	0	0	0	0	0	0	1
Constitutive coactivator of PPAR-gamma-like protein 1	F120A_HUMAN	0	0	0	0	0	0	1	0	0	0	0	0	0	0	0	0	0	1
Protein FAM150A	F150A_HUMAN	0	0	1	0	0	0	0	0	0	0	0	0	0	0	0	0	1	0
Soluble lamin-associated protein of 75 kDa	F169A_HUMAN	0	0	0	0	0	0	1	0	0	0	0	0	0	0	0	0	0	1
Fructose-1 6-bisphosphatase 1	F16P1_HUMAN	1	0	1	0	1	0	1	1	1	0	0	0	1	1	0	0	1	1
Fructose-16-bisphosphatase isozyme 2	F16P2_HUMAN	0	0	1	0	0	0	1	0	0	0	0	0	0	1	0	0	0	1
Protein FAM184A	F184A_HUMAN	1	0	0	0	0	0	0	1	0	0	0	0	0	0	0	0	0	0
Uncharacterized protein C3orf63	F208A_HUMAN	0	0	1	0	0	0	0	0	0	0	0	0	0	1	0	0	0	0
Coagulation factor XI	FA11_HUMAN	0	0	1	0	0	0	0	0	0	0	0	0	0	1	0	0	0	0
Coagulation factor XII	FA12_HUMAN	1	0	0	0	0	0	0	0	0	0	0	0	1	0	0	0	0	0
Protein FAM20A	FA20A_HUMAN	1	0	1	0	0	0	0	1	0	0	0	0	1	1	0	0	0	0
WASH complex subunit FAM21B	FA21B_HUMAN	0	0	0	0	0	0	1	0	0	0	0	0	0	0	0	0	0	1
Protein FAM32A	FA32A_HUMAN	0	0	0	0	0	0	1	0	0	0	0	0	0	0	0	0	0	1
Protein FAM83F	FA83F_HUMAN	1	0	0	0	0	0	0	0	0	0	0	0	1	0	0	0	0	0
Protein FAM84B	FA84B_HUMAN	1	0	0	0	0	0	1	1	0	0	0	0	0	0	0	0	0	1
Fumarylacetoacetase	FAAA_HUMAN	1	0	0	0	0	0	1	1	0	0	0	0	1	0	0	0	0	1
Fatty acid-binding protein epidermal	FABP5_HUMAN	0	0	0	0	0	0	1	0	0	0	0	0	0	0	0	0	0	1
Fatty acid-binding protein brain	FABP7_HUMAN	1	0	0	0	1	1	1	1	0	0	0	0	1	0	0	1	0	1
Fatty acid-binding protein heart	FABPH_HUMAN	1	1	1	1	1	1	1	1	1	1	1	1	1	1	1	1	1	1
CAAX prenyl protease 1 homolog	FACE1_HUMAN	0	0	0	0	0	0	1	0	0	0	0	0	0	0	0	0	0	1
Fumarylacetoacetate hydrolase domain-containing protein 2A	FAH2A_HUMAN	1	0	0	0	0	0	1	1	0	0	0	0	0	0	0	0	0	1
Protein FAM3B	FAM3B_HUMAN	1	0	0	0	0	0	1	1	0	0	0	0	1	0	0	0	0	1
Protein FAM3C	FAM3C_HUMAN	1	0	0	0	0	0	1	1	0	0	0	0	1	0	0	0	0	1
Coiled-coil domain-containing protein MTMR15	FAN1_HUMAN	0	0	1	0	0	0	0	0	0	0	0	0	0	1	0	0	0	0
Fatty acid synthase	FAS_HUMAN	1	1	1	1	1	1	1	1	1	1	1	1	1	1	0	1	1	1
Protocadherin Fat 2	FAT2_HUMAN	1	0	1	0	1	0	0	1	1	0	0	0	1	1	0	0	0	0
Fas-binding factor 1	FBF1_HUMAN	0	0	1	0	0	0	0	0	0	0	0	0	0	1	0	0	0	0
Fibulin-1	FBLN1_HUMAN	1	0	1	0	0	0	1	1	0	0	0	0	1	0	0	0	1	1
EGF-containing fibulin-like extracellular matrix protein 1	FBLN3_HUMAN	1	0	1	0	0	0	1	1	0	0	0	0	1	0	1	0	1	1
Fibulin-5	FBLN5_HUMAN	1	0	0	0	0	0	1	0	0	0	0	0	1	0	0	0	0	1
F-box only protein 50	FBX50_HUMAN	0	0	0	0	0	0	1	0	0	0	0	0	0	0	0	0	0	1
F-box/LRR-repeat protein 8	FBXL8_HUMAN	0	0	0	0	0	0	1	0	0	0	0	0	0	0	0	0	0	1
IgGFc-binding protein	FCGBP_HUMAN	1	0	1	0	0	0	0	1	0	0	0	0	1	1	0	0	0	0
GDP-L-fucose synthase	FCL_HUMAN	1	0	1	0	1	0	1	1	1	0	0	0	1	1	0	0	0	1
Ficolin-2	FCN2_HUMAN	1	0	1	0	0	0	0	1	0	0	0	0	1	0	0	0	1	0
Squalene synthase	FDFT_HUMAN	0	0	0	0	0	0	1	0	0	0	0	0	0	0	0	0	0	1
Tyrosine-protein kinase Fer	FER_HUMAN	1	0	0	0	0	0	0	1	0	0	0	0	0	0	0	0	0	0
Fermitin family homolog 2	FERM2_HUMAN	1	0	0	0	0	0	0	0	0	0	0	0	1	0	0	0	0	0
Tyrosine-protein kinase Fes/Fps	FES_HUMAN	0	0	1	0	0	0	0	0	0	0	0	0	0	1	0	0	0	0
Alpha-2-HS-glycoprotein	FETUA_HUMAN	1	1	1	0	1	0	1	1	1	0	1	0	1	1	1	1	1	1
Fibroblast growth factor-binding protein 1	FGFP1_HUMAN	1	0	1	0	1	0	1	1	1	0	1	0	1	0	0	0	1	1
Bis(5'-adenosyl)-triphosphatase	FHIT_HUMAN	1	0	0	0	0	0	1	1	0	0	0	0	0	0	0	0	0	1
Complement factor H-related protein 1	FHR1_HUMAN	1	0	0	0	0	0	1	1	0	0	0	0	1	0	0	0	0	1
Complement factor H-related protein 2	FHR2_HUMAN	1	0	0	0	0	0	0	1	0	0	0	0	0	0	0	0	0	0
Complement factor H-related protein 3	FHR3_HUMAN	1	0	0	0	0	0	0	1	0	0	0	0	0	0	0	0	0	0
Fibrinogen alpha chain	FIBA_HUMAN	1	0	1	0	1	0	1	1	1	1	0	0	1	1	0	0	1	1
Fibrinogen beta chain	FIBB_HUMAN	1	0	1	0	1	0	1	1	0	1	0	0	1	1	1	0	1	1
Fibrinogen gamma chain	FIBG_HUMAN	1	0	1	0	1	0	1	1	0	1	1	0	1	1	1	0	1	1
Adenosine monophosphate-protein transferase FICD	FICD_HUMAN	0	0	0	0	1	0	0	0	0	1	0	0	0	0	0	0	0	0
Filaggrin	FILA_HUMAN	1	0	1	0	0	0	1	0	0	0	0	0	1	1	0	0	0	1
Filaggrin-2	FILA2_HUMAN	1	0	0	0	0	0	1	1	0	0	0	0	0	0	0	0	0	1
Fibronectin	FINC_HUMAN	1	1	1	0	1	0	1	1	1	0	0	0	1	1	0	1	1	1
Mitochondrial fission 1 protein	FIS1_HUMAN	0	0	0	0	0	0	1	0	0	0	0	0	0	0	0	0	0	1
Peptidyl-prolyl cis-trans isomerase FKBP11	FKB11_HUMAN	0	0	0	0	0	0	1	0	0	0	0	0	0	0	0	0	0	1
Peptidyl-prolyl cis-trans isomerase FKBP1A	FKB1A_HUMAN	1	0	1	0	0	0	1	1	0	0	0	0	1	0	0	0	1	1
Peptidyl-prolyl cis-trans isomerase FKBP2	FKBP2_HUMAN	1	0	0	0	0	0	1	1	0	0	0	0	0	0	0	0	0	1
Peptidyl-prolyl cis-trans isomerase FKBP3	FKBP3_HUMAN	1	0	0	0	0	0	1	1	0	0	0	0	1	0	0	0	0	1
Peptidyl-prolyl cis-trans isomerase FKBP4	FKBP4_HUMAN	1	0	1	0	0	0	1	1	0	0	0	0	1	1	0	0	0	1
Protein flightless-1 homolog	FLII_HUMAN	0	0	0	0	0	0	1	0	0	0	0	0	0	0	0	0	0	1
Filamin-A	FLNA_HUMAN	0	0	0	0	0	0	1	0	0	0	0	0	0	0	0	0	0	1
Filamin-B	FLNB_HUMAN	1	0	1	0	0	0	1	1	0	0	0	0	1	1	0	0	1	1
Filamin-C	FLNC_HUMAN	0	0	0	0	0	0	1	0	0	0	0	0	0	0	0	0	0	1
Flotillin-1	FLOT1_HUMAN	0	0	0	0	0	0	1	0	0	0	0	0	0	0	0	0	0	1
Flotillin-2	FLOT2_HUMAN	0	0	1	0	0	0	1	0	0	0	0	0	0	1	0	0	0	1
Formin-2	FMN2_HUMAN	0	0	0	0	1	0	0	0	0	1	0	0	0	0	0	0	0	0
Protein farnesyltransferase/geranylgeranyltransferase type-1 subunit alpha	FNTA_HUMAN	1	0	0	0	0	0	1	0	0	0	0	0	1	0	0	0	0	1
Zinc finger protein ZFPM2	FOG2_HUMAN	0	0	1	0	0	0	0	0	0	0	0	0	0	1	0	0	0	0
Glutamate carboxypeptidase 2	FOLH1_HUMAN	0	0	0	0	1	1	1	0	0	0	0	0	0	0	0	1	0	1
Folate receptor alpha	FOLR1_HUMAN	1	1	1	0	1	1	1	1	1	1	1	0	1	1	0	1	0	1
Fos-related antigen 1	FOSL1_HUMAN	0	0	0	0	0	0	1	0	0	0	0	0	0	0	0	0	0	1
Farnesyl pyrophosphate synthase	FPPS_HUMAN	1	0	1	0	0	0	1	1	0	0	0	0	1	1	0	0	1	1
Prostaglandin F2 receptor negative regulator	FPRP_HUMAN	1	0	0	0	0	0	0	1	0	0	0	0	0	0	0	0	0	0
Fer-1-like protein 5	FR1L5_HUMAN	0	0	0	0	0	0	1	0	0	0	0	0	0	0	0	0	0	1
FRAS1-related extracellular matrix protein 2	FREM2_HUMAN	1	0	0	0	0	0	0	1	0	0	0	0	0	0	0	0	0	0
FRAS1-related extracellular matrix protein 3	FREM3_HUMAN	1	0	0	0	0	0	0	1	0	0	0	0	1	0	0	0	0	0
Ferritin heavy chain	FRIH_HUMAN	1	0	1	0	0	0	1	1	0	0	0	0	1	0	0	0	1	1
Ferritin light chain	FRIL_HUMAN	1	0	0	0	0	0	0	1	0	0	0	0	0	0	0	0	0	0
FERM domain-containing protein 4B	FRM4B_HUMAN	0	0	1	0	0	0	0	0	0	0	0	0	0	0	0	0	1	0
Fascin	FSCN1_HUMAN	1	0	0	0	0	0	1	0	0	0	0	0	1	0	0	0	0	1
Follistatin-related protein 1	FSTL1_HUMAN	1	0	1	0	0	0	1	1	0	0	0	0	1	1	1	0	1	1
10-formyltetrahydrofolate dehydrogenase	FTHFD_HUMAN	1	0	1	0	1	0	0	1	1	0	0	0	0	1	0	0	0	0
Tissue alpha-L-fucosidase	FUCO_HUMAN	1	0	1	0	1	0	1	1	1	0	0	0	1	1	0	0	1	1
Plasma alpha-L-fucosidase	FUCO2_HUMAN	1	0	0	0	0	0	0	1	0	0	0	0	1	0	0	0	0	0
Fumarate hydratase mitochondrial	FUMH_HUMAN	1	0	0	0	0	0	1	0	0	0	0	0	1	0	0	0	0	1
Galactoside 3(4)-L-fucosyltransferase	FUT3_HUMAN	1	0	1	0	0	0	1	0	1	0	0	0	0	1	0	0	0	1
Alpha-(13)-fucosyltransferase	FUT6_HUMAN	1	0	1	0	0	0	1	1	0	0	0	0	1	1	0	0	1	1
FYVE and coiled-coil domain-containing protein 1	FYCO1_HUMAN	0	0	1	0	0	0	0	0	0	0	0	0	0	1	0	0	0	0
1-phosphatidylinositol 3-phosphate 5-kinase	FYV1_HUMAN	0	0	0	0	0	0	1	0	0	0	0	0	0	0	0	0	0	1
G0/G1 switch regulatory protein 2	G0S2_HUMAN	1	0	0	0	0	0	1	0	0	0	0	0	1	0	0	0	0	1
Ras GTPase-activating protein-binding protein 1	G3BP1_HUMAN	0	0	0	0	0	0	1	0	0	0	0	0	0	0	0	0	0	1
Glyceraldehyde-3-phosphate dehydrogenase	G3P_HUMAN	1	1	1	1	1	1	1	1	1	1	1	1	1	1	0	1	1	1
Glyceraldehyde 3-phopshate dehydrogenase testis specific	G3PT_HUMAN	1	0	0	0	0	0	0	0	0	0	0	0	0	0	0	1	0	0
Glucose-6-phosphate 1-dehydrogenase	G6PD_HUMAN	1	0	1	0	0	0	1	0	0	0	0	0	1	0	0	0	1	1
Glucose-6-phosphate isomerase	G6PI_HUMAN	1	0	1	0	0	0	1	1	0	0	0	0	1	1	0	0	0	1
Glucose-6-phosphate translocase	G6PT1_HUMAN	0	0	0	0	0	0	1	0	0	0	0	0	0	0	0	0	0	1
GAS2-like protein 2	GA2L2_HUMAN	0	0	1	0	0	0	0	0	0	0	0	0	0	1	0	0	0	0
UDP-glucose 4-epimerase	GALE_HUMAN	1	0	1	0	1	0	1	1	1	0	0	0	1	1	0	0	0	1
Galactokinase	GALK1_HUMAN	0	0	0	0	0	0	1	0	0	0	0	0	0	0	0	0	0	1
N-acetylgalactosamine kinase	GALK2_HUMAN	0	0	0	0	0	0	1	0	0	0	0	0	0	0	0	0	0	1
Aldose 1-epimerase	GALM_HUMAN	1	0	0	0	0	0	1	1	0	0	0	0	0	0	0	0	0	1
Galactose-1-phosphate uridylyltransferase	GALT_HUMAN	0	0	1	0	0	0	1	0	0	0	0	0	0	0	0	0	1	1
Polypeptide N-acetylgalactosaminyltransferase 1	GALT1_HUMAN	1	0	0	0	0	0	0	1	0	0	0	0	1	0	0	0	0	0
Polypeptide N-acetylgalactosaminyltransferase 2	GALT2_HUMAN	1	0	1	0	0	0	1	1	0	0	0	0	1	1	0	0	1	1
Polypeptide N-acetylgalactosaminyltransferase 3	GALT3_HUMAN	1	0	0	0	0	0	0	0	0	0	0	0	1	0	0	0	0	0
Polypeptide N-acetylgalactosaminyltransferase 5	GALT5_HUMAN	1	0	0	0	0	0	0	0	0	0	0	0	1	0	0	0	0	0
Neutral alpha-glucosidase AB	GANAB_HUMAN	1	0	1	0	1	0	1	1	1	1	0	0	1	1	0	0	0	1
Neutral alpha-glucosidase C	GANC_HUMAN	0	0	1	0	0	0	0	0	0	0	0	0	0	1	0	0	0	0
Golgi-associated plant pathogenesis-related protein 1	GAPR1_HUMAN	1	1	1	1	1	1	1	1	1	1	1	1	1	1	0	1	1	1
Growth arrest-specific protein 1	GAS1_HUMAN	1	0	0	0	0	0	0	1	0	0	0	0	0	0	0	0	0	0
Guanine nucleotide-binding protein G(I)/G(S)/G(T) subunit beta-1	GBB1_HUMAN	1	0	1	1	1	1	1	1	0	1	0	1	1	1	0	1	0	1
Guanine nucleotide-binding protein G(I)/G(S)/G(T) subunit beta-2	GBB2_HUMAN	1	0	1	0	1	1	0	1	0	1	0	0	1	0	1	1	0	0
Guanine nucleotide-binding protein subunit beta-4 (transducin 4B)	GBB4_HUMAN	1	0	0	0	1	1	1	1	0	0	0	0	1	0	0	1	0	1
Guanine nucleotide-binding protein G(I)/G(S)/G(O) subunit gamma-12	GBG12_HUMAN	1	0	0	0	1	0	1	1	1	0	0	0	1	0	0	0	0	1
Guanine nucleotide-binding protein G(I)/G(S)/G(O) subunit gamma-5	GBG5_HUMAN	1	0	0	0	0	0	0	1	0	0	0	0	0	0	0	0	0	0
Guanine nucleotide-binding protein G(I)/G(S)/G(O) subunit gamma-7	GBG7_HUMAN	0	0	0	0	0	0	1	0	0	0	0	0	0	0	0	0	0	1
Guanine nucleotide-binding protein subunit beta-2-like 1	GBLP_HUMAN	1	0	1	0	0	0	1	1	0	0	0	0	1	1	0	0	0	1
Interferon-induced guanylate-binding protein 1	GBP1_HUMAN	0	0	1	0	0	0	0	0	0	0	0	0	0	1	0	0	0	0
Interferon-induced guanylate-binding protein 2	GBP2_HUMAN	1	0	1	0	0	0	0	0	0	0	0	0	1	1	0	0	0	0
GRIP and coiled-coil domain-containing protein 1	GCC1_HUMAN	0	0	1	0	0	0	0	0	0	0	0	0	0	1	0	0	0	0
Translational activator GCN1	GCN1L_HUMAN	1	0	0	0	0	0	1	1	0	0	0	0	1	0	0	0	0	1
Glycogen debranching enzyme	GDE_HUMAN	1	0	1	0	0	0	0	1	0	0	0	0	0	1	0	0	0	0
Rab GDP dissociation inhibitor alpha	GDIA_HUMAN	1	0	0	0	0	0	1	0	0	0	0	0	1	0	0	0	0	1
Rab GDP dissociation inhibitor beta	GDIB_HUMAN	1	0	1	1	1	0	1	1	1	1	1	1	1	1	0	0	1	1
Rho GDP-dissociation inhibitor 1	GDIR1_HUMAN	1	0	1	0	1	0	1	1	1	0	0	0	1	1	0	0	0	1
Rho GDP-dissociation inhibitor 2	GDIR2_HUMAN	1	0	0	0	0	0	0	1	0	0	0	0	1	0	0	0	0	0
Gelsolin	GELS_HUMAN	1	0	1	0	1	0	1	1	1	1	1	0	1	1	0	0	1	1
Gem-associated protein 5	GEMI5_HUMAN	1	0	0	0	0	0	0	1	0	0	0	0	0	0	0	0	0	0
Gephyrin	GEPH_HUMAN	1	0	0	0	0	0	1	0	0	0	0	0	1	0	0	0	0	1
Golgi to ER traffic protein 4 homolog	GET4_HUMAN	0	0	0	0	0	0	1	0	0	0	0	0	0	0	0	0	0	1
Glial fibrillary acidic protein	GFAP_HUMAN	0	0	0	0	0	0	1	0	0	0	0	0	0	0	0	0	0	1
Glucosamine--fructose-6-phosphate aminotransferase [isomerizing] 1	GFPT1_HUMAN	1	0	1	0	0	0	1	1	0	0	0	0	1	1	0	0	0	1
GTP cyclohydrolase 1 feedback regulatory protein	GFRP_HUMAN	1	0	0	0	0	0	1	0	0	0	0	0	1	0	0	0	0	1
ADP-ribosylation factor-binding protein GGA3	GGA3_HUMAN	0	0	1	0	0	0	0	0	0	0	0	0	0	1	0	0	0	0
Gamma-glutamylcyclotransferase	GGCT_HUMAN	1	0	0	0	0	0	1	1	0	0	0	0	1	0	0	0	0	1
Gamma-glutamyl hydrolase	GGH_HUMAN	1	0	0	0	0	0	0	1	0	0	0	0	1	0	0	0	0	0
Gamma-glutamyltranspeptidase 1	GGT1_HUMAN	1	0	1	0	1	1	1	1	1	1	0	0	1	1	1	1	1	1
Gamma-glutamyltranspeptidase 2	GGT2_HUMAN	0	0	1	0	0	0	0	0	0	0	0	0	0	0	0	0	1	0
Gamma-glutamyltransferase 5	GGT5_HUMAN	1	0	0	0	1	1	0	0	0	0	0	0	1	0	0	1	0	0
Gamma-glutamyltransferase 6	GGT6_HUMAN	1	0	0	0	0	0	1	0	0	0	0	0	1	0	0	0	0	1
Gamma-interferon-inducible lysosomal thiol reductase	GILT_HUMAN	1	0	0	0	0	0	0	1	0	0	0	0	1	0	0	0	0	0
PDZ domain-containing protein GIPC1	GIPC1_HUMAN	1	0	0	0	0	0	1	0	0	0	0	0	1	0	0	0	0	1
ARF GTPase-activating protein GIT2	GIT2_HUMAN	0	0	0	0	0	0	1	0	0	0	0	0	0	0	0	0	0	1
Glucosylceramidase	GLCM_HUMAN	1	0	0	0	0	0	1	1	0	0	0	0	1	0	0	0	0	1
Putative glycosylation-dependent cell adhesion molecule 1	GLCM1_HUMAN	1	0	0	0	1	0	0	0	1	0	0	0	0	0	0	0	0	0
Nucleoporin GLE1	GLE1_HUMAN	0	0	1	0	0	0	0	0	0	0	0	0	0	1	0	0	0	0
14-alpha-glucan-branching enzyme	GLGB_HUMAN	1	0	0	0	0	0	1	0	0	0	0	0	1	0	0	0	0	1
Glutamine synthetase	GLNA_HUMAN	1	0	0	0	0	0	0	1	0	0	0	0	1	0	0	0	0	0
Hydroxyacylglutathione hydrolase mitochondrial	GLO2_HUMAN	1	0	0	0	0	0	0	1	0	0	0	0	1	0	0	0	0	0
Glyoxalase domain-containing protein 4	GLOD4_HUMAN	1	0	1	0	0	0	1	1	0	0	0	0	1	0	0	0	1	1
Golgi phosphoprotein 3-like	GLP3L_HUMAN	1	0	0	0	0	0	1	0	0	0	0	0	1	0	0	0	0	1
Glycerol kinase	GLPK_HUMAN	1	0	0	0	0	0	1	0	0	0	0	0	1	0	0	0	0	1
Glutaredoxin-1	GLRX1_HUMAN	1	0	0	0	0	0	1	1	0	0	0	0	1	0	0	0	0	1
Glutaredoxin-3	GLRX3_HUMAN	1	0	0	0	0	0	1	0	0	0	0	0	1	0	0	0	0	1
Polypeptide N-acetylgalactosaminyltransferase 10	GLT10_HUMAN	1	0	0	0	0	0	0	1	0	0	0	0	0	0	0	0	0	0
Glycolipid transfer protein	GLTP_HUMAN	1	0	0	0	0	0	1	0	0	0	0	0	1	0	0	0	0	1
Glucosidase 2 subunit beta	GLU2B_HUMAN	1	0	1	0	0	0	1	1	0	0	0	0	1	1	0	0	0	1
Serine hydroxymethyltransferase cytosolic	GLYC_HUMAN	1	0	0	0	0	0	1	1	0	0	0	0	1	0	0	0	0	1
Glycogenin-1	GLYG_HUMAN	1	0	0	0	0	0	0	1	0	0	0	0	1	0	0	0	0	0
GDP-mannose 4 6 dehydratase	GMDS_HUMAN	1	0	1	0	0	0	1	1	0	0	0	0	1	1	0	0	0	1
Glia maturation factor beta	GMFB_HUMAN	1	0	0	0	0	0	1	1	0	0	0	0	1	0	0	0	0	1
Mannose-1-phosphate guanyltransferase alpha	GMPPA_HUMAN	1	0	0	0	0	0	1	1	0	0	0	0	1	0	0	0	0	1
Mannose-1-phosphate guanyltransferase beta	GMPPB_HUMAN	1	0	0	0	0	0	1	1	0	0	0	0	1	0	0	0	0	1
GMP reductase 2	GMPR2_HUMAN	1	0	0	0	0	0	1	0	0	0	0	0	1	0	0	0	0	1
Glucosamine 6-phosphate N-acetyltransferase	GNA1_HUMAN	1	0	0	0	0	0	0	0	0	0	0	0	1	0	0	0	0	0
Guanine nucleotide-binding protein subunit alpha-11	GNA11_HUMAN	1	0	0	0	1	1	0	1	0	0	0	0	0	0	0	1	0	0
Guanine nucleotide-binding protein subunit alpha-12	GNA12_HUMAN	0	0	1	0	0	0	0	0	0	0	0	0	0	1	0	0	0	0
Guanine nucleotide-binding protein alpha-13 subunit	GNA13_HUMAN	0	0	0	0	1	1	0	0	0	0	0	0	0	0	0	1	0	0
Guanine nucleotide-binding protein G(i) alpha-2 subunit	GNAI2_HUMAN	1	0	0	0	1	1	0	0	0	0	0	0	0	0	0	1	0	0
Guanine nucleotide-binding protein G(k) subunit alpha	GNAI3_HUMAN	1	0	0	0	1	1	0	0	0	0	0	0	1	0	0	1	0	0
Guanine nucleotide-binding protein G(q) subunit alpha	GNAQ_HUMAN	1	0	0	0	1	1	1	1	0	1	0	0	1	0	0	1	0	1
Guanine nucleotide-binding protein G(s) subunit alpha isoforms XLas	GNAS1_HUMAN	1	0	0	0	1	1	0	1	0	0	0	0	1	0	0	1	0	0
Cluster of Guanine nucleotide-binding protein G(s) subunit alpha isoforms short	GNAS2_HUMAN	0	0	0	0	0	0	1	0	0	0	0	0	0	0	0	0	0	1
Cluster of Guanine nucleotide-binding protein G(t) subunit alpha-2	GNAT2_HUMAN	0	0	0	0	0	0	1	0	0	0	0	0	0	0	0	0	0	1
Glucosamine-6-phosphate isomerase 1	GNPI1_HUMAN	1	0	0	0	0	0	0	0	0	0	0	0	1	0	0	0	0	0
N-acetylglucosamine-1-phosphotransferase subunit gamma	GNPTG_HUMAN	1	0	1	0	0	0	0	1	0	0	0	0	1	0	0	0	1	0
N-acetylglucosamine-6-sulfatase	GNS_HUMAN	1	0	1	0	0	0	1	1	0	0	0	0	1	1	0	0	0	1
Cluster of Golgin subfamily A member 8H	GOG8H_HUMAN	0	0	0	0	0	0	1	0	0	0	0	0	0	0	0	0	0	1
Golgin subfamily B member 1	GOGB1_HUMAN	1	0	0	0	0	0	0	1	0	0	0	0	0	0	0	0	0	0
Golgi integral membrane protein 4	GOLI4_HUMAN	1	0	0	0	0	0	0	0	0	0	0	0	1	0	0	0	0	0
Golgi membrane protein 1	GOLM1_HUMAN	1	0	1	0	0	0	0	1	0	0	0	0	1	0	1	0	0	0
Golgi phosphoprotein 3	GOLP3_HUMAN	0	0	0	0	0	0	1	0	0	0	0	0	0	0	0	0	0	1
Golgi reassembly-stacking protein 2	GORS2_HUMAN	1	0	0	0	0	0	0	0	0	0	0	0	1	0	0	0	0	0
Golgi SNAP receptor complex member 1	GOSR1_HUMAN	0	0	0	0	0	0	1	0	0	0	0	0	0	0	0	0	0	1
Vesicle transport protein GOT1B	GOT1B_HUMAN	0	0	0	0	0	0	1	0	0	0	0	0	0	0	0	0	0	1
G-protein coupled receptor 126	GP126_HUMAN	1	0	0	0	0	0	1	1	0	0	0	0	1	0	0	0	0	1
Glycerol-3-phosphate acyltransferase 3	GPAT3_HUMAN	0	0	0	0	0	0	1	0	0	0	0	0	0	0	0	0	0	1
Glycerol-3-phosphate acyltransferase 4	GPAT4_HUMAN	0	0	0	0	0	0	1	0	0	0	0	0	0	0	0	0	0	1
Glypican-1	GPC1_HUMAN	1	0	0	0	0	0	0	1	0	0	0	0	0	0	0	0	0	0
Glypican-4	GPC4_HUMAN	1	0	0	0	0	0	0	1	0	0	0	0	0	0	0	0	0	0
G-protein coupled receptor family C group 5 member B	GPC5B_HUMAN	1	0	1	0	1	0	1	1	1	1	0	0	1	1	1	0	1	1
G-protein coupled receptor family C group 5 member C	GPC5C_HUMAN	1	0	0	0	0	0	1	1	0	0	0	0	1	0	0	0	0	1
Glypican-6	GPC6_HUMAN	0	0	0	0	0	0	1	0	0	0	0	0	0	0	0	0	0	1
Glycerol-3-phosphate dehydrogenase 1-like protein	GPD1L_HUMAN	1	0	0	0	0	0	1	1	0	0	0	0	1	0	0	0	0	1
Glycerol-3-phosphate dehydrogenase [NAD+] cytoplasmic	GPDA_HUMAN	1	0	1	0	0	0	1	1	0	0	0	0	1	0	0	0	1	1
Transmembrane glycoprotein NMB	GPNMB_HUMAN	1	0	0	0	0	0	0	0	0	0	0	0	1	0	0	0	0	0
G-protein coupled receptor 56	GPR56_HUMAN	1	0	0	0	0	0	1	1	0	0	0	0	1	0	0	0	0	1
Glutathione peroxidase 1	GPX1_HUMAN	0	0	0	0	0	0	1	0	0	0	0	0	0	0	0	0	0	1
Glutathione peroxidase 3	GPX3_HUMAN	1	0	1	1	1	0	1	1	1	1	0	1	1	1	0	0	1	1
Phospholipid hydroperoxide glutathione peroxidase mitochondrial	GPX4_HUMAN	1	0	1	0	1	1	1	1	0	0	0	0	1	1	0	1	0	1
GREB1-like protein	GRB1L_HUMAN	0	0	0	0	0	0	1	0	0	0	0	0	0	0	0	0	0	1
Growth factor receptor-bound protein 2	GRB2_HUMAN	1	0	0	0	0	0	1	0	0	0	0	0	1	0	0	0	0	1
Glutaredoxin domain-containing cysteine-rich protein 1	GRCR1_HUMAN	0	0	1	0	0	0	0	0	0	0	0	0	0	1	0	0	0	0
Gremlin-2	GREM2_HUMAN	1	0	1	0	0	0	1	1	0	0	0	0	1	0	0	0	1	1
Glyoxylate reductase/hydroxypyruvate reductase	GRHPR_HUMAN	1	0	0	0	0	0	1	1	0	0	0	0	1	0	0	0	0	1
Glutamate receptor ionotropic kainate 1	GRIK1_HUMAN	0	0	0	0	1	0	0	0	0	1	0	0	0	0	0	0	0	0
Granulins	GRN_HUMAN	1	0	1	0	0	0	0	1	0	0	0	0	1	1	0	0	1	0
RAS guanyl-releasing protein 4	GRP4_HUMAN	0	0	1	0	0	0	0	0	0	0	0	0	0	1	0	0	0	0
78 kDa glucose-regulated protein	GRP78_HUMAN	1	1	1	0	1	1	1	1	0	1	1	0	1	1	0	1	1	1
Genetic suppressor element 1	GSE1_HUMAN	1	0	0	0	0	0	0	1	0	0	0	0	0	0	0	0	0	0
Glutamate--cysteine ligase catalytic subunit	GSH1_HUMAN	1	0	0	0	0	0	0	0	0	0	0	0	1	0	0	0	0	0
Glutathione synthetase	GSHB_HUMAN	1	0	0	0	0	0	1	1	0	0	0	0	1	0	0	0	0	1
Golgi apparatus protein 1	GSLG1_HUMAN	1	0	0	0	0	0	0	1	0	0	0	0	1	0	0	0	0	0
Glutathione S-transferase theta-2	GST2_HUMAN	1	0	0	0	0	0	1	0	0	0	0	0	1	0	0	0	0	1
Glutathione S-transferase A1	GSTA1_HUMAN	1	0	0	0	0	0	0	0	0	0	0	0	1	0	0	0	0	0
Glutathione S-transferase kappa 1	GSTK1_HUMAN	1	0	0	0	0	0	1	0	0	0	0	0	1	0	0	0	0	1
Glutathione S-transferase Mu 1	GSTM1_HUMAN	1	0	0	0	0	0	0	1	0	0	0	0	0	0	0	0	0	0
Glutathione S-transferase Mu 3	GSTM3_HUMAN	1	0	0	0	0	0	1	0	0	0	0	0	1	0	0	0	0	1
Glutathione S-transferase omega-1	GSTO1_HUMAN	1	0	1	0	0	0	1	1	0	0	0	0	1	1	0	0	1	1
Glutathione S-transferase P	GSTP1_HUMAN	1	0	0	0	0	0	1	1	0	0	0	0	1	0	0	0	0	1
Glutathione S-transferase theta-1	GSTT1_HUMAN	1	0	0	0	0	0	1	1	0	0	0	0	1	0	0	0	0	1
GTP-binding protein 5	GTPB5_HUMAN	1	0	0	0	0	0	0	0	0	0	0	0	1	0	0	0	0	0
Solute carrier family 2 facilitated glucose transporter member 9	GTR9_HUMAN	0	0	0	0	0	0	1	0	0	0	0	0	0	0	0	0	0	1
Interferon-induced very large GTPase 1	GVIN1_HUMAN	1	0	0	0	0	0	0	1	0	0	0	0	0	0	0	0	0	0
Histone H12	H12_HUMAN	0	0	1	0	0	0	0	0	0	0	0	0	0	0	0	0	1	0
Histone H1.5	H15_HUMAN	0	0	1	0	0	0	0	0	0	0	0	0	0	1	0	0	0	0
Histone H2A type 1	H2A1_HUMAN	0	0	1	0	0	0	0	0	0	0	0	0	0	1	0	0	0	0
Histone H2A type 1-B/E	H2A1B_HUMAN	1	0	0	0	0	0	1	0	0	0	0	0	1	0	0	0	0	1
Histone H2A type 1-D	H2A1D_HUMAN	0	0	1	0	0	0	0	0	0	0	0	0	0	1	0	0	0	0
Histone H2A type 1-J	H2A1J_HUMAN	0	0	1	0	0	0	0	0	0	0	0	0	0	1	0	0	1	0
Histone H2A.J	H2AJ_HUMAN	1	0	0	0	1	0	0	1	1	0	0	0	0	0	0	0	0	0
Histone H2B type 1-A	H2B1A_HUMAN	0	0	1	0	0	0	0	0	0	0	0	0	0	0	0	0	1	0
Histone H2B type 1-C/E/F/G/I	H2B1C_HUMAN	1	0	0	0	0	0	0	0	0	0	0	0	1	0	0	0	0	0
Histone H2B type 1-D	H2B1D_HUMAN	1	0	0	0	0	0	0	0	0	0	1	0	0	0	0	0	0	0
Histone H2B type 1-M	H2B1M_HUMAN	0	0	1	0	0	0	0	0	0	0	0	0	0	1	0	0	0	0
Histone H2B type 2-F	H2B2F_HUMAN	1	0	0	0	0	0	0	1	0	0	0	0	0	0	0	0	0	0
Histone H2B type 3-B	H2B3B_HUMAN	0	0	1	0	0	0	1	0	0	0	0	0	0	1	0	0	0	1
Histone H3.1	H31_HUMAN	0	0	0	0	0	0	1	0	0	0	0	0	0	0	0	0	0	1
Histone H3.1t	H31T_HUMAN	1	0	0	0	0	0	0	1	0	0	0	0	1	0	0	0	0	0
Histone H3.2	H32_HUMAN	0	0	1	0	0	0	0	0	0	0	0	0	0	1	0	0	0	0
Histone H4	H4_HUMAN	1	0	1	0	1	0	1	1	1	0	0	0	1	1	0	0	0	1
Putative heat shock protein HSP 90-beta 4	H90B4_HUMAN	0	0	0	0	0	0	1	0	0	0	0	0	0	0	0	0	0	1
Very-long-chain (3R)-3-hydroxyacyl-[acyl-carrier protein] dehydratase 2	HACD2_HUMAN	0	0	0	0	0	0	1	0	0	0	0	0	0	0	0	0	0	1
Very-long-chain (3R)-3-hydroxyacyl-[acyl-carrier protein] dehydratase 3	HACD3_HUMAN	0	0	0	0	0	0	1	0	0	0	0	0	0	0	0	0	0	1
28 kDa heat- and acid-stable phosphoprotein	HAP28_HUMAN	1	0	0	0	0	0	0	0	0	0	0	0	1	0	0	0	0	0
Hemoglobin subunit alpha	HBA_HUMAN	1	0	0	0	0	0	0	0	0	0	0	0	1	0	0	0	0	0
Hemoglobin subunit beta	HBB_HUMAN	1	0	1	0	0	0	1	0	0	0	0	0	1	1	0	0	1	1
Hemoglobin subunit delta	HBD_HUMAN	1	0	0	0	0	0	0	0	0	0	1	0	0	0	0	0	0	0
Hemoglobin subunit gamma-1	HBG1_HUMAN	0	0	1	0	0	0	0	0	0	0	0	0	0	1	0	0	0	0
Hydroxyacyl-coenzyme A dehydrogenase mitochondrial	HCDH_HUMAN	0	0	0	0	0	0	1	0	0	0	0	0	0	0	0	0	0	1
Haloacid dehalogenase-like hydrolase domain-containing protein 2	HDHD2_HUMAN	1	0	0	0	0	0	0	0	0	0	0	0	1	0	0	0	0	0
Haloacid dehalogenase-like hydrolase domain-containing protein 3	HDHD3_HUMAN	0	0	0	0	0	0	1	0	0	0	0	0	0	0	0	0	0	1
Heme-binding protein 1	HEBP1_HUMAN	1	0	1	0	1	1	1	1	0	0	0	0	1	1	0	1	1	1
Heme-binding protein 2	HEBP2_HUMAN	1	0	0	0	0	0	0	0	0	0	0	0	1	0	0	0	0	0
DNA helicase B	HELB_HUMAN	0	0	1	0	0	0	0	0	0	0	0	0	0	1	0	0	0	0
Peroxisomal proliferator-activated receptor A-interacting complex 285 kDa protein	HELZ2_HUMAN	0	0	1	0	0	0	0	0	0	0	0	0	0	1	0	0	0	0
Delta-aminolevulinic acid dehydratase	HEM2_HUMAN	1	0	1	0	0	0	1	1	0	0	0	0	1	1	0	0	0	1
Hemopexin	HEMO_HUMAN	1	0	1	0	0	0	1	1	0	0	0	0	1	1	1	1	1	1
Heparin cofactor 2	HEP2_HUMAN	1	0	0	0	1	0	1	1	1	0	0	0	1	0	0	0	0	1
Serine protease hepsin	HEPS_HUMAN	0	0	1	0	0	0	0	0	0	0	0	0	0	1	0	0	0	0
Probable E3 ubiquitin-protein ligase HERC1	HERC1_HUMAN	0	0	1	0	0	0	0	0	0	0	0	0	0	1	0	0	0	0
Beta-hexosaminidase subunit alpha	HEXA_HUMAN	1	0	0	0	0	0	1	0	0	0	0	0	1	0	0	0	0	1
Beta-hexosaminidase subunit beta	HEXB_HUMAN	1	0	1	0	1	0	1	1	1	0	0	0	1	1	0	0	0	1
HLA class II histocompatibility antigen gamma chain	HG2A_HUMAN	1	0	0	0	0	0	0	0	0	0	0	0	1	0	0	0	0	0
Hepatocyte growth factor activator	HGFA_HUMAN	0	0	1	0	0	0	0	0	0	0	0	0	0	1	0	0	0	0
3-hydroxyisobutyryl-CoA hydrolase mitochondrial	HIBCH_HUMAN	1	0	0	0	0	0	1	0	0	0	0	0	1	0	0	0	0	1
Histidine triad nucleotide-binding protein 1	HINT1_HUMAN	1	0	0	0	0	0	1	1	0	0	0	0	1	0	0	0	0	1
Histidine triad nucleotide-binding protein 3	HINT3_HUMAN	0	0	0	0	0	0	1	0	0	0	0	0	0	0	0	0	0	1
HLA class I histocompatibility antigen alpha chain E	HLAE_HUMAN	1	0	0	0	0	0	0	0	0	0	0	0	1	0	0	0	0	0
HLA class I histocompatibility antigen alpha chain G	HLAG_HUMAN	1	0	0	0	0	0	0	0	0	0	0	0	1	0	0	1	0	0
Minor histocompatibility antigen H13	HM13_HUMAN	0	0	0	0	0	0	1	0	0	0	0	0	0	0	0	0	0	1
Histamine N-methyltransferase	HNMT_HUMAN	1	0	1	0	0	0	1	1	0	0	0	0	1	0	0	0	1	1
Cluster of Heterogeneous nuclear ribonucleoprotein F	HNRPF_HUMAN	0	0	0	0	0	0	1	0	0	0	0	0	0	0	0	0	0	1
Heterogeneous nuclear ribonucleoprotein K	HNRPK_HUMAN	1	0	0	0	0	0	1	0	0	0	0	0	1	0	0	0	0	1
Heterogeneous nuclear ribonucleoprotein M	HNRPM_HUMAN	0	0	1	0	0	0	0	0	0	0	0	0	0	1	0	0	0	0
Heterogeneous nuclear ribonucleoprotein Q	HNRPQ_HUMAN	1	0	1	0	0	0	1	0	0	0	0	0	1	0	0	0	1	1
Hornerin	HORN_HUMAN	1	0	1	0	1	0	1	1	1	0	0	0	0	0	0	0	1	1
Hyaluronan and proteoglycan link protein 3	HPLN3_HUMAN	1	0	1	0	1	0	1	1	0	1	0	0	1	1	1	1	1	1
Hyaluronan and proteoglycan link protein 4	HPLN4_HUMAN	0	0	1	0	0	0	0	0	0	0	0	0	0	1	0	0	0	0
Hypoxanthine-guanine phosphoribosyltransferase	HPRT_HUMAN	1	0	1	0	0	0	1	1	0	0	0	0	1	1	0	0	0	1
Haptoglobin	HPT_HUMAN	1	1	1	1	1	0	1	1	1	1	1	1	1	1	1	1	1	1
Haptoglobin-related protein	HPTR_HUMAN	1	1	0	0	0	0	0	0	0	0	0	0	1	0	0	1	0	0
Histidine-rich glycoprotein	HRG_HUMAN	1	0	1	0	0	0	0	0	0	0	0	0	1	1	0	0	0	0
Heat shock protein 105 kDa	HS105_HUMAN	1	0	0	0	0	0	1	0	0	0	0	0	1	0	0	0	0	1
Heat shock 70 kDa protein 1L	HS71L_HUMAN	0	1	0	0	0	0	0	0	0	0	0	0	0	0	0	1	0	0
Heat shock 70 kDa protein 4L	HS74L_HUMAN	0	0	0	0	0	0	1	0	0	0	0	0	0	0	0	0	0	1
Putative heat shock protein HSP 90-alpha A4	HS904_HUMAN	0	0	0	0	0	0	1	0	0	0	0	0	0	0	0	0	0	1
Heat shock protein HSP 90-alpha	HS90A_HUMAN	1	0	1	1	1	0	1	1	1	1	0	1	1	1	0	0	1	1
Heat shock protein HSP 90-beta	HS90B_HUMAN	1	0	1	0	1	0	0	1	1	0	0	0	1	1	0	0	1	0
Heat shock 70 kDa protein 13	HSP13_HUMAN	1	0	1	0	0	0	1	0	0	0	0	0	1	0	0	0	1	1
Heat shock 70 kDa protein 1A/1B	HSP71_HUMAN	1	0	1	0	0	0	1	0	0	0	0	0	1	1	0	0	1	1
Heat shock-related 70 kDa protein 2	HSP72_HUMAN	0	0	1	0	0	0	0	0	0	0	0	0	0	0	0	0	1	0
Heat shock 70 kDa protein 4	HSP74_HUMAN	1	0	1	0	0	0	1	1	0	0	0	0	1	1	0	0	1	1
Heat shock 70 kDa protein 6	HSP76_HUMAN	0	0	1	0	0	0	0	0	0	0	0	0	0	0	0	0	1	0
Heat shock cognate 71 kDa protein	HSP7C_HUMAN	1	0	1	0	1	0	1	1	1	1	0	0	1	1	1	1	1	1
Heat shock protein beta-1	HSPB1_HUMAN	1	0	1	1	1	0	1	1	0	1	0	1	1	1	0	0	1	1
Oxidoreductase HTATIP2	HTAI2_HUMAN	0	0	0	0	0	0	1	0	0	0	0	0	0	0	0	0	0	1
E3 ubiquitin-protein ligase HUWE1	HUWE1_HUMAN	1	0	0	0	0	0	1	1	0	0	0	0	1	0	0	0	0	1
Ig heavy chain V-I region EU PE	HV101_HUMAN	1	0	1	0	0	0	0	1	0	0	0	0	0	1	0	0	0	0
Ig heavy chain V-I region HG3 PE	HV102_HUMAN	1	0	1	0	0	0	0	1	0	0	1	0	1	0	0	0	1	0
Ig heavy chain V-I region V35 PE	HV103_HUMAN	1	0	1	0	0	0	1	1	0	0	0	0	1	1	0	0	1	1
Ig heavy chain V-I region WOL	HV105_HUMAN	0	0	0	0	0	0	1	0	0	0	0	0	0	0	0	0	0	1
Ig heavy chain V-II region OU	HV201_HUMAN	0	0	0	0	0	0	1	0	0	0	0	0	0	0	0	0	0	1
Ig heavy chain V-II region WAH	HV206_HUMAN	1	0	0	0	0	0	1	0	0	0	0	0	1	0	0	0	0	1
Ig heavy chain V-II region NEWM	HV207_HUMAN	1	1	1	0	0	0	1	0	0	0	0	0	0	1	0	1	0	1
Ig heavy chain V-II region SESS PE	HV208_HUMAN	1	0	1	0	0	0	0	1	0	0	0	0	1	1	0	0	0	0
Ig heavy chain V-II region ARH-77 PE	HV209_HUMAN	1	0	1	0	0	0	1	1	0	0	0	0	1	1	0	0	0	1
Ig heavy chain V-III region TRO	HV301_HUMAN	1	0	1	0	0	0	1	0	0	0	0	0	1	1	0	0	0	1
Ig heavy chain V-III region WEA PE	HV302_HUMAN	1	0	0	0	0	0	1	1	0	0	0	0	1	0	0	0	0	1
Ig heavy chain V-III region VH26 PE	HV303_HUMAN	1	0	1	0	0	0	0	1	0	0	0	0	1	1	0	1	0	0
Ig heavy chain V-III region TIL PE	HV304_HUMAN	1	0	1	0	0	0	0	1	0	0	0	0	0	0	0	0	1	0
Ig heavy chain V-III region BRO PE	HV305_HUMAN	1	1	1	0	0	0	1	1	0	0	1	0	0	0	0	1	1	1
Ig heavy chain V-III region BUT PE	HV306_HUMAN	1	0	1	0	0	0	1	1	0	0	0	0	1	1	0	0	0	1
Ig heavy chain V-III region CAM	HV307_HUMAN	1	0	1	0	0	0	1	0	0	0	0	0	1	1	0	1	0	1
Ig heavy chain V-III region GA PE	HV308_HUMAN	1	0	0	0	0	0	1	1	0	0	0	0	1	0	0	0	0	1
Ig heavy chain V-III region NIE PE	HV309_HUMAN	1	0	0	0	0	0	1	1	0	0	0	0	1	0	0	0	0	1
Ig heavy chain V-III region HIL	HV310_HUMAN	1	0	0	0	0	0	1	0	0	0	0	0	1	0	0	0	0	1
Ig heavy chain V-III region KOL PE	HV311_HUMAN	1	0	1	0	0	0	1	1	0	0	0	0	0	1	0	0	0	1
Ig heavy chain V-III region BUR PE	HV312_HUMAN	1	0	1	0	0	0	1	1	0	0	0	0	0	1	0	0	0	1
Ig heavy chain V-III region POM	HV313_HUMAN	0	0	1	0	0	0	0	0	0	0	0	0	0	1	0	0	0	0
Ig heavy chain V-III region WAS	HV315_HUMAN	1	0	0	0	0	0	0	0	0	0	0	0	0	0	0	1	0	0
Ig heavy chain V-III region TEI	HV316_HUMAN	1	0	1	0	0	0	0	0	0	0	0	0	0	1	0	1	1	0
Ig heavy chain V-III region TUR	HV318_HUMAN	0	0	1	0	0	0	0	0	0	0	0	0	0	1	0	0	1	0
Ig heavy chain V-III region JON PE	HV319_HUMAN	1	0	1	0	0	0	1	1	0	0	0	0	0	1	0	0	0	1
Ig heavy chain V-III region GAL PE	HV320_HUMAN	1	0	1	0	0	0	1	1	0	0	0	0	1	1	0	0	0	1
Epoxide hydrolase 1	HYEP_HUMAN	0	0	0	0	0	0	1	0	0	0	0	0	0	0	0	0	0	1
Epoxide hydrolase 2	HYES_HUMAN	1	0	0	0	0	0	1	0	0	0	0	0	1	0	0	0	0	1
Hypoxia up-regulated protein 1	HYOU1_HUMAN	1	0	1	0	1	0	1	1	1	0	0	0	1	1	0	0	1	1
Huntingtin-interacting protein K	HYPK_HUMAN	1	0	0	0	0	0	0	0	0	0	0	0	1	0	0	0	0	0
Interleukin-13 receptor subunit alpha-1	I13R1_HUMAN	0	0	0	0	0	0	1	0	0	0	0	0	0	0	0	0	0	1
Interleukin-18-binding protein	I18BP_HUMAN	1	0	0	0	0	0	0	1	0	0	0	0	1	0	0	0	0	0
Insulin-like growth factor-binding protein 2	IBP2_HUMAN	1	0	1	0	1	0	1	1	1	1	0	0	1	1	0	0	1	1
Insulin-like growth factor-binding protein 3	IBP3_HUMAN	0	0	1	0	0	0	0	0	0	0	0	0	0	1	0	0	0	0
Insulin-like growth factor-binding protein 7	IBP7_HUMAN	1	0	0	0	0	0	0	0	0	0	0	0	1	0	0	0	0	0
Plasma protease C1 inhibitor	IC1_HUMAN	1	0	1	0	1	0	1	1	1	0	0	0	1	1	1	1	1	1
Calpastatin	ICAL_HUMAN	1	0	0	0	0	0	0	0	0	0	0	0	1	0	0	0	0	0
Intercellular adhesion molecule 1	ICAM1_HUMAN	1	0	0	0	0	0	0	1	0	0	0	0	1	0	0	0	0	0
Isocitrate dehydrogenase [NADP] cytoplasmic	IDHC_HUMAN	1	0	1	0	1	0	1	1	1	1	0	0	1	1	0	0	1	1
Isocitrate dehydrogenase [NADP] mitochondrial	IDHP_HUMAN	1	0	0	0	0	0	1	0	0	0	0	0	1	0	0	0	0	1
Isopentenyl-diphosphate Delta-isomerase 1	IDI1_HUMAN	1	0	1	0	0	0	1	1	0	0	0	0	1	0	0	0	1	1
Alpha-L-iduronidase	IDUA_HUMAN	1	0	0	0	0	0	1	0	0	0	0	0	1	0	0	0	0	1
Eukaryotic translation initiation factor 1A X-chromosomal	IF1AX_HUMAN	1	0	0	0	0	0	1	0	0	0	0	0	1	0	0	0	0	1
Eukaryotic translation initiation factor 2 subunit 1	IF2A_HUMAN	1	0	0	0	0	0	1	1	0	0	0	0	1	0	0	0	0	1
Eukaryotic translation initiation factor 2 subunit 2	IF2B_HUMAN	0	0	0	0	0	0	1	0	0	0	0	0	0	0	0	0	0	1
Eukaryotic translation initiation factor 2 subunit 3	IF2G_HUMAN	1	0	0	0	0	0	1	0	0	0	0	0	1	0	0	0	0	1
Eukaryotic initiation factor 4A-I	IF4A1_HUMAN	1	0	1	0	0	0	1	1	0	0	0	0	1	1	0	0	0	1
Eukaryotic initiation factor 4A-II	IF4A2_HUMAN	1	0	1	0	0	0	0	0	0	0	0	0	1	1	0	0	0	0
Eukaryotic initiation factor 4A-III	IF4A3_HUMAN	0	0	0	0	1	0	0	0	0	1	0	0	0	0	0	0	0	0
Eukaryotic translation initiation factor 4B	IF4B_HUMAN	1	0	0	0	0	0	0	0	0	0	0	0	1	0	0	0	0	0
Eukaryotic translation initiation factor 4E	IF4E_HUMAN	0	0	0	0	0	0	1	0	0	0	0	0	0	0	0	0	0	1
Eukaryotic translation initiation factor 4 gamma 1	IF4G1_HUMAN	1	0	0	0	0	0	1	0	0	0	0	0	1	0	0	0	0	1
Eukaryotic translation initiation factor 4 gamma 2	IF4G2_HUMAN	1	0	0	0	0	0	0	0	0	0	0	0	1	0	0	0	0	0
Eukaryotic translation initiation factor 4H	IF4H_HUMAN	1	0	0	0	0	0	0	0	0	0	0	0	1	0	0	0	0	0
Eukaryotic translation initiation factor 5	IF5_HUMAN	1	0	0	0	0	0	1	0	0	0	0	0	1	0	0	0	0	1
Eukaryotic translation initiation factor 5A-1	IF5A1_HUMAN	1	0	1	0	1	0	1	1	0	0	0	0	1	1	0	1	1	1
Eukaryotic translation initiation factor 5A-1-like	IF5AL_HUMAN	0	0	1	0	0	0	0	0	0	0	0	0	0	1	0	0	0	0
Eukaryotic translation initiation factor 6	IF6_HUMAN	0	0	0	0	0	0	1	0	0	0	0	0	0	0	0	0	0	1
Intraflagellar transport protein 81 homolog	IFT81_HUMAN	1	0	0	0	0	0	0	1	0	0	0	0	0	0	0	0	0	0
Insulin-like growth factor IA (somatomedin C)	IGF1A_HUMAN	0	0	0	0	1	0	0	0	0	0	0	0	0	0	0	1	0	0
Ig alpha-1 chain C region	IGHA1_HUMAN	1	1	1	1	1	1	1	1	1	1	1	1	1	1	1	1	1	1
Ig alpha-2 chain C region	IGHA2_HUMAN	1	1	1	1	1	0	1	1	0	1	1	1	1	1	1	1	1	1
Ig delta chain C region	IGHD_HUMAN	1	0	1	0	0	0	1	0	0	0	0	0	1	1	0	0	1	1
Ig gamma-1 chain C region	IGHG1_HUMAN	1	1	1	1	1	0	1	1	1	1	1	1	1	1	1	1	1	1
Ig gamma-2 chain C region	IGHG2_HUMAN	1	1	1	0	0	0	1	1	0	0	0	0	1	1	0	1	1	1
Ig gamma-3 chain C region	IGHG3_HUMAN	1	1	1	0	0	0	1	1	0	0	0	0	1	1	0	1	0	1
Ig gamma-4 chain C region	IGHG4_HUMAN	1	0	1	0	0	0	1	1	0	0	0	0	1	1	0	1	0	1
Ig mu chain C region	IGHM_HUMAN	1	1	1	1	1	0	1	1	1	1	1	1	1	1	1	1	1	1
Immunoglobulin J chain	IGJ_HUMAN	1	1	1	1	1	0	1	1	1	1	1	1	1	1	1	1	1	1
Ig kappa chain C region	IGKC_HUMAN	1	1	1	1	1	1	1	1	1	1	1	1	1	1	1	1	1	1
Immunoglobulin lambda-like polypeptide 1	IGLL1_HUMAN	1	0	1	0	0	0	1	0	0	0	0	0	1	1	0	0	0	1
Immunoglobulin lambda-like polypeptide 5	IGLL5_HUMAN	1	0	1	0	0	0	1	0	0	0	0	0	1	0	0	0	1	1
Immunoglobulin superfamily member 8	IGSF8_HUMAN	1	0	0	0	0	0	1	1	0	0	0	0	1	0	0	0	0	1
Interleukin-19	IL19_HUMAN	1	0	1	0	0	0	1	0	0	0	0	0	1	1	0	0	0	1
Interleukin-6 receptor subunit beta	IL6RB_HUMAN	1	0	0	0	0	0	0	0	0	0	0	0	1	0	0	0	0	0
Interleukin-7 receptor subunit alpha	IL7RA_HUMAN	0	0	0	0	0	0	1	0	0	0	0	0	0	0	0	0	0	1
Leukocyte elastase inhibitor	ILEU_HUMAN	1	0	1	0	0	0	1	1	0	0	0	0	1	1	1	0	0	1
Importin subunit alpha-4	IMA4_HUMAN	0	0	0	0	0	0	1	0	0	0	0	0	0	0	0	0	0	1
Importin subunit beta-1	IMB1_HUMAN	1	0	0	0	0	0	1	0	0	0	0	0	1	0	0	0	0	1
Inosine-5'-monophosphate dehydrogenase 2	IMDH2_HUMAN	1	0	0	0	0	0	1	0	0	0	0	0	1	0	0	0	0	1
Inositol monophosphatase 1	IMPA1_HUMAN	0	0	0	0	0	0	1	0	0	0	0	0	0	0	0	0	0	1
Inositol monophosphatase 3	IMPA3_HUMAN	1	0	0	0	0	0	1	0	0	0	0	0	1	0	0	0	0	1
Interferon-induced 35 kDa protein	IN35_HUMAN	1	0	0	0	0	0	0	1	0	0	0	0	1	0	0	0	0	0
InaD-like protein	INADL_HUMAN	1	0	0	0	0	0	0	0	0	0	0	0	1	0	0	0	0	0
Integrator complex subunit 3	INT3_HUMAN	1	0	0	0	0	0	0	0	0	0	0	0	1	0	0	0	0	0
Inversin	INVS_HUMAN	1	0	0	0	0	0	0	1	0	0	0	0	0	0	0	0	0	0
Importin-4	IPO4_HUMAN	1	0	0	0	0	0	0	0	0	0	0	0	1	0	0	0	0	0
Importin-5	IPO5_HUMAN	1	0	0	0	0	0	1	0	0	0	0	0	1	0	0	0	0	1
Importin-7	IPO7_HUMAN	1	0	0	0	0	0	0	0	0	0	0	0	1	0	0	0	0	0
Protein phosphatase inhibitor 2	IPP2_HUMAN	1	0	0	0	0	0	0	0	0	0	0	0	1	0	0	0	0	0
Plasma serine protease inhibitor	IPSP_HUMAN	1	0	0	0	1	0	1	0	1	0	0	0	1	0	0	0	0	1
Inorganic pyrophosphatase	IPYR_HUMAN	1	0	1	0	0	0	1	1	1	0	0	0	1	1	0	0	0	1
IQ motif and SEC7 domain-containing protein 1	IQEC1_HUMAN	0	0	1	0	0	0	0	0	0	0	0	0	0	1	0	0	0	0
Ras GTPase-activating-like protein IQGAP1	IQGA1_HUMAN	1	0	1	0	0	0	1	1	0	0	0	0	1	1	0	0	0	1
Ras GTPase-activating-like protein IQGAP2	IQGA2_HUMAN	1	0	0	0	0	0	1	0	0	0	0	0	1	0	0	0	0	1
Ras GTPase-activating-like protein IQGAP3	IQGA3_HUMAN	0	0	0	0	0	0	1	0	0	0	0	0	0	0	0	0	0	1
Immunity-related GTPase family Q protein	IRGQ_HUMAN	0	0	1	0	0	0	0	0	0	0	0	0	0	0	0	0	1	0
Ubiquitin-like protein ISG15	ISG15_HUMAN	0	0	0	0	0	0	1	0	0	0	0	0	0	0	0	0	0	1
Interferon-stimulated gene 20 kDa protein	ISG20_HUMAN	0	0	0	0	0	0	1	0	0	0	0	0	0	0	0	0	0	1
Immunoglobulin superfamily containing leucine-rich repeat protein	ISLR_HUMAN	1	0	1	0	0	0	1	0	0	0	0	0	1	1	0	0	0	1
Isochorismatase domain-containing protein 1	ISOC1_HUMAN	1	0	0	0	0	0	1	0	0	0	0	0	1	0	0	0	0	1
IST1 homolog	IST1_HUMAN	1	0	0	0	0	0	1	1	0	0	0	0	1	0	0	0	0	1
Integrin beta-3	ITB3_HUMAN	0	0	0	0	0	0	1	0	0	0	0	0	0	0	0	0	0	1
Integrin beta4 (CD104 antigen)	ITB4_HUMAN	0	1	0	0	0	0	0	0	0	0	0	0	0	0	0	1	0	0
Integrin beta-like protein 1	ITGBL_HUMAN	1	0	0	0	0	0	0	1	0	0	0	0	1	0	0	0	0	0
Inter-alpha-trypsin inhibitor heavy chain H1	ITIH1_HUMAN	1	0	0	0	1	0	1	1	1	0	0	0	1	0	0	0	0	1
Inter-alpha-trypsin inhibitor heavy chain H2	ITIH2_HUMAN	1	0	1	0	1	0	1	1	1	0	0	0	1	1	0	0	1	1
Inter-alpha-trypsin inhibitor heavy chain H3	ITIH3_HUMAN	1	0	0	0	0	0	0	1	0	0	0	0	1	0	0	0	0	0
Inter-alpha-trypsin inhibitor heavy chain H4	ITIH4_HUMAN	1	0	1	0	1	0	1	1	1	0	0	0	1	1	0	0	1	1
Inositol 145-trisphosphate receptor type 2	ITPR2_HUMAN	0	1	1	0	0	0	0	0	0	0	0	0	0	1	0	1	0	0
Inositol 145-trisphosphate receptor type 3	ITPR3_HUMAN	0	0	1	0	0	0	0	0	0	0	0	0	0	1	0	0	0	0
Isovaleryl-CoA dehydrogenase mitochondrial	IVD_HUMAN	0	0	0	0	0	0	1	0	0	0	0	0	0	0	0	0	0	1
Josephin-2	JOS2_HUMAN	0	0	0	0	0	0	1	0	0	0	0	0	0	0	0	0	0	1
Uncharacterized protein KIAA0408	K0408_HUMAN	0	0	1	0	0	0	0	0	0	0	0	0	0	1	0	0	0	0
Probable E3 ubiquitin-protein ligase C12orf51	K0614_HUMAN	1	0	0	0	0	0	0	1	0	0	0	0	0	0	0	0	0	0
UPF0577 protein KIAA1324	K1324_HUMAN	0	0	0	0	0	0	1	0	0	0	0	0	0	0	0	0	0	1
UPF0606 protein KIAA1549	K1549_HUMAN	0	0	1	0	0	0	0	0	0	0	0	0	0	1	0	0	0	0
WD repeat-containing protein KIAA1875	K1875_HUMAN	0	0	1	0	0	0	0	0	0	0	0	0	0	1	0	0	0	0
Keratin type I cytoskeletal 10	K1C10_HUMAN	1	1	1	0	1	1	0	1	0	0	0	0	1	1	0	1	1	0
Keratin type I cytoskeletal 13	K1C13_HUMAN	1	0	1	0	0	0	0	1	0	0	0	0	0	1	0	0	0	0
Keratin type I cytoskeletal 14	K1C14_HUMAN	1	0	1	0	0	0	0	1	0	0	0	0	0	1	0	0	1	0
Keratin type I cytoskeletal 16	K1C16_HUMAN	1	0	1	0	0	0	0	1	0	0	0	0	0	1	0	0	0	0
Keratin type I cytoskeletal 17	K1C17_HUMAN	1	0	0	0	0	0	0	1	0	0	0	0	0	0	0	0	0	0
Keratin type I cytoskeletal 18	K1C18_HUMAN	0	0	0	0	0	0	1	0	0	0	0	0	0	0	0	0	0	1
Keratin type I cytoskeletal 19	K1C19_HUMAN	1	0	1	0	0	0	0	1	0	0	0	0	1	1	0	0	0	0
Keratin type I cytoskeletal 20	K1C20_HUMAN	0	0	1	0	0	0	0	0	0	0	0	0	0	0	0	0	1	0
Keratin type I cytoskeletal 24	K1C24_HUMAN	0	0	1	0	0	0	0	0	0	0	0	0	0	1	0	0	0	0
Keratin type I cytoskeletal 9	K1C9_HUMAN	1	1	1	0	1	1	1	1	0	0	0	0	1	1	0	1	1	1
Keratin type I cuticular Ha1	K1H1_HUMAN	1	0	0	0	0	0	0	1	0	0	0	0	0	0	0	0	0	0
Keratin type II cytoskeletal 2 epidermal	K22E_HUMAN	1	1	1	0	1	1	0	1	0	0	0	0	1	1	0	1	1	0
Keratin type II cytoskeletal 2	K22O_HUMAN	0	0	0	0	0	1	0	0	0	0	0	0	0	0	0	1	0	0
Keratin type II cytoskeletal 1	K2C1_HUMAN	1	1	1	0	1	1	0	1	0	0	0	0	1	1	0	1	1	0
Keratin type II cytoskeletal 1b	K2C1B_HUMAN	0	0	1	0	0	0	0	0	0	0	0	0	0	1	0	0	0	0
Keratin type II cytoskeletal 4	K2C4_HUMAN	1	0	0	0	0	0	1	1	0	0	0	0	0	0	0	0	0	1
Keratin type II cytoskeletal 5	K2C5_HUMAN	1	0	1	0	0	0	0	1	0	0	0	0	0	1	0	0	1	0
Keratin type II cytoskeletal 6A	K2C6A_HUMAN	1	0	1	0	1	1	0	1	0	0	0	0	0	1	0	1	0	0
Keratin type II cytoskeletal 6B	K2C6B_HUMAN	0	0	1	0	0	0	0	0	0	0	0	0	0	1	0	0	0	0
Keratin type II cytoskeletal 6C	K2C6C_HUMAN	0	0	1	0	0	0	0	0	0	0	0	0	0	1	0	0	0	0
Keratin type II cytoskeletal 7	K2C7_HUMAN	1	0	1	0	0	0	0	0	0	0	0	0	1	1	0	0	0	0
Keratin type II cytoskeletal 73	K2C73_HUMAN	0	0	1	0	0	0	0	0	0	0	0	0	0	1	0	0	0	0
Keratin type II cytoskeletal 75	K2C75_HUMAN	1	0	0	0	0	0	0	1	0	0	0	0	0	0	0	0	0	0
Keratin type II cytoskeletal 78	K2C78_HUMAN	1	0	0	0	0	0	0	1	0	0	0	0	0	0	0	0	0	0
Keratin type II cytoskeletal 8	K2C8_HUMAN	1	0	0	0	0	0	0	1	0	0	0	0	1	0	0	0	0	0
Dyslexia-associated protein KIAA0319-like protein	K319L_HUMAN	0	0	1	0	0	0	1	0	0	0	0	0	0	0	0	0	1	1
6-phosphofructokinase liver type	K6PL_HUMAN	1	0	1	0	0	0	1	0	0	0	0	0	1	1	0	0	0	1
Adenylate kinase isoenzyme 1	KAD1_HUMAN	1	0	0	0	0	0	1	0	0	0	0	0	1	0	0	0	0	1
Kallistatin	KAIN_HUMAN	1	0	1	0	0	0	1	0	0	0	0	0	1	0	0	0	1	1
Uncharacterized protein KIAA1310	KANL3_HUMAN	0	0	1	0	0	0	0	0	0	0	0	0	0	1	0	0	0	0
cAMP-dependent protein kinase type I-alpha regulatory subunit	KAP0_HUMAN	1	0	0	0	0	0	1	1	0	0	0	0	0	0	0	0	0	1
cAMP-dependent protein kinase type II-alpha regulatory subunit	KAP2_HUMAN	1	0	0	0	0	0	1	0	0	0	0	0	1	0	0	0	0	1
cAMP-dependent protein kinase type II-beta regulatory subunit	KAP3_HUMAN	1	0	0	0	0	0	1	0	0	0	0	0	1	0	0	0	0	1
cAMP-dependent protein kinase catalytic subunit alpha	KAPCA_HUMAN	1	0	0	0	0	0	1	1	0	0	0	0	1	0	0	0	0	1
Kynurenine--oxoglutarate transaminase 3	KAT3_HUMAN	1	0	0	0	0	0	1	0	0	0	0	0	1	0	0	0	0	1
Casein kinase I isoform alpha	KC1A_HUMAN	1	0	0	0	0	0	0	1	0	0	0	0	1	0	0	0	0	0
BTB/POZ domain-containing protein KCTD14	KCD14_HUMAN	1	0	0	0	0	0	1	0	0	0	0	0	1	0	0	0	0	1
Calcium-activated potassium channel subunit alpha-1	KCMA1_HUMAN	0	0	0	0	0	0	1	0	0	0	0	0	0	0	0	0	0	1
Potassium voltage-gated channel subfamily B member 1	KCNB1_HUMAN	1	0	0	0	0	0	0	1	0	0	0	0	0	0	0	0	0	0
Potassium voltage-gated channel subfamily B member 2	KCNB2_HUMAN	0	0	0	0	0	0	1	0	0	0	0	0	0	0	0	0	0	1
Potassium voltage-gated channel subfamily S member 1	KCNS1_HUMAN	0	0	0	0	1	0	0	0	0	0	0	0	0	0	0	1	0	0
Creatine kinase B-type	KCRB_HUMAN	0	0	0	0	0	0	1	0	0	0	0	0	0	0	0	0	0	1
UMP-CMP kinase	KCY_HUMAN	1	0	1	0	0	0	1	1	0	0	0	0	1	1	0	0	1	1
lysine-specific demethylase 5A	KDM5A_HUMAN	1	0	0	0	0	0	0	0	0	0	1	0	0	0	0	0	0	0
Kinesin-like protein KIF13B	KI13B_HUMAN	0	0	1	0	0	0	0	0	0	0	0	0	0	1	0	0	0	0
Kinesin-like protein KIF20B	KI20B_HUMAN	1	0	0	0	0	0	0	1	0	0	0	0	0	0	0	0	0	0
Kinesin-like protein KIF26A	KI26A_HUMAN	0	0	1	0	0	0	0	0	0	0	0	0	0	1	0	0	0	0
Kinesin-like protein KIF15	KIF15_HUMAN	0	0	1	0	0	0	0	0	0	0	0	0	0	1	0	0	0	0
Kinesin-like protein KIF17	KIF17_HUMAN	1	0	0	0	0	0	0	1	0	0	0	0	0	0	0	0	0	0
Kinesin-like protein KIF1A	KIF1A_HUMAN	0	0	1	0	0	0	0	0	0	0	0	0	0	1	0	0	0	0
Kinesin-like protein KIF27	KIF27_HUMAN	1	0	0	0	0	0	0	0	0	0	0	0	1	0	0	0	0	0
Kinesin heavy chain isoform 5A	KIF5A_HUMAN	0	0	0	0	0	0	1	0	0	0	0	0	0	0	0	0	0	1
Kinesin heavy chain isoform 5C	KIF5C_HUMAN	0	0	0	0	0	0	1	0	0	0	0	0	0	0	0	0	0	1
Mevalonate kinase	KIME_HUMAN	1	0	0	0	0	0	1	0	0	0	0	0	1	0	0	0	0	1
Kinesin-1 heavy chain	KINH_HUMAN	1	0	0	0	0	0	1	0	0	0	0	0	1	0	0	0	0	1
Kallikrein 11	KLK11_HUMAN	0	0	1	0	0	0	0	0	0	0	0	0	0	0	1	0	0	0
Kallikrein-6	KLK6_HUMAN	1	0	1	0	1	0	1	1	1	0	0	0	1	1	1	0	0	1
Kallikrein-8	KLK8_HUMAN	1	0	0	0	0	0	0	1	0	0	0	0	1	0	0	0	0	0
Plasma kallikrein	KLKB1_HUMAN	1	0	0	0	0	0	0	0	0	0	0	0	1	0	0	0	0	0
Histone-lysine N-methyltransferase MLL	KMT2A_HUMAN	0	0	1	0	0	0	0	0	0	0	0	0	0	1	0	0	0	0
Kininogen-1	KNG1_HUMAN	1	1	1	0	1	0	1	1	1	0	0	0	1	1	1	1	1	1
Serine/threonine-protein kinase D2	KPCD2_HUMAN	0	0	1	0	0	0	0	0	0	0	0	0	0	1	0	0	0	0
Phosphoribosyl pyrophosphate synthase-associated protein 1	KPRA_HUMAN	1	0	0	0	0	0	1	0	0	0	0	0	1	0	0	0	0	1
Phosphoribosyl pyrophosphate synthase-associated protein 2	KPRB_HUMAN	0	0	0	0	0	0	1	0	0	0	0	0	0	0	0	0	0	1
Keratinocyte proline-rich protein	KPRP_HUMAN	0	0	0	0	0	0	1	0	0	0	0	0	0	0	0	0	0	1
Pyruvate kinase isozymes M1/M2	KPYM_HUMAN	1	0	1	0	0	0	1	1	0	0	0	0	1	1	0	0	1	1
Keratin type II cuticular Hb2	KRT82_HUMAN	1	0	1	0	0	0	0	1	0	0	0	0	0	1	0	0	0	0
Keratin type II cuticular Hb3	KRT83_HUMAN	1	0	1	0	0	0	0	1	0	0	0	0	0	1	0	0	0	0
Keratin type II cuticular Hb4	KRT84_HUMAN	1	0	0	0	0	0	0	1	0	0	0	0	0	0	0	0	0	0
Cluster of Ribosomal protein S6 kinase alpha-1	KS6A1_HUMAN	0	0	0	0	0	0	1	0	0	0	0	0	0	0	0	0	0	1
Keratin type I cuticular Ha3-I	KT33A_HUMAN	1	0	1	0	0	0	0	1	0	0	0	0	0	1	0	0	0	0
Ketosamine-3-kinase	KT3K_HUMAN	0	0	0	0	0	0	1	0	0	0	0	0	0	0	0	0	0	1
Kinectin	KTN1_HUMAN	1	0	0	0	0	0	1	1	0	0	0	0	1	0	0	0	0	1
Ig kappa chain V-I region AG PE	KV101_HUMAN	1	0	1	0	0	0	0	1	0	0	1	0	0	1	0	1	0	0
Ig kappa chain V-I region CAR	KV104_HUMAN	1	1	1	0	0	0	0	0	0	0	0	0	0	1	0	1	0	0
Ig kappa chain V-I region DEE PE	KV105_HUMAN	1	1	1	0	0	0	1	1	0	0	0	0	1	1	0	1	0	1
Ig kappa chain V-I region EU PE	KV106_HUMAN	1	0	1	0	0	0	1	1	0	0	0	0	1	0	0	0	1	1
Ig kappa chain V-I region Gal	KV107_HUMAN	1	0	1	0	0	0	0	0	0	0	0	0	0	1	0	1	0	0
Ig kappa chain V-III region GAL	KV108_HUMAN	1	0	0	0	0	0	0	0	0	0	0	0	0	0	0	1	0	0
Ig kappa chain V-I region HK102 (Fragment)	KV110_HUMAN	0	0	0	0	0	0	1	0	0	0	0	0	0	0	0	0	0	1
Ig kappa chain V-I region Ka PE	KV111_HUMAN	1	0	1	0	0	0	1	1	0	0	0	0	0	1	0	0	0	1
Ig kappa chain V-I region Kue	KV112_HUMAN	1	0	0	0	0	0	1	0	0	0	0	0	1	0	0	0	0	1
Ig kappa chain V-I region Lay	KV113_HUMAN	0	0	0	0	0	0	1	0	0	0	0	0	0	0	0	0	0	1
Ig kappa chain V-I region OU	KV114_HUMAN	1	0	1	0	0	0	0	0	0	0	0	0	1	1	0	0	0	0
Ig kappa chain V-I region Rei	KV115_HUMAN	1	0	0	0	0	0	0	0	0	0	0	0	1	0	0	0	0	0
Ig kappa chain V-I region Roy	KV116_HUMAN	1	0	1	0	0	0	0	0	0	0	0	0	1	1	0	0	0	0
Ig kappa chain V-I region WEA PE	KV118_HUMAN	1	0	1	0	0	0	0	1	0	0	0	0	1	0	0	0	1	0
Ig kappa chain V-I region Wes PE	KV119_HUMAN	1	1	1	0	0	0	1	1	0	0	0	0	1	1	0	1	1	1
Ig kappa chain V-I region Mev	KV120_HUMAN	1	0	1	0	0	0	0	0	0	0	0	0	1	0	0	0	1	0
Ig kappa chain Vâ€“I region Hau	KV121_HUMAN	0	0	1	0	0	0	1	0	0	0	0	0	0	0	0	0	1	1
Ig kappa chain V-I region BAN	KV122_HUMAN	1	1	1	0	0	0	1	0	0	0	0	0	0	1	0	1	1	1
Ig kappa chain V-I region Walker	KV123_HUMAN	0	0	1	0	0	0	0	0	0	0	0	0	0	1	0	0	0	0
Ig kappa chain V-II region Cum	KV201_HUMAN	0	0	0	0	0	0	1	0	0	0	0	0	0	0	0	0	0	1
Ig kappa chain V-I region MIL	KV203_HUMAN	1	1	0	0	0	0	1	1	0	0	0	0	1	0	0	1	0	1
Ig kappa chain V-II region TEW PE	KV204_HUMAN	1	0	1	0	0	0	1	1	0	0	1	0	0	1	0	0	0	1
Ig kappa chain V-II region GM607 (Fragment)	KV205_HUMAN	0	0	1	0	0	0	1	0	0	0	0	0	0	1	0	0	1	1
Ig kappa chain V-I region RPMI	KV206_HUMAN	1	0	1	0	0	0	1	1	0	0	0	0	1	1	0	1	1	1
Ig kappa chain V-I region B6	KV301_HUMAN	1	1	1	0	0	0	1	1	0	0	0	0	1	1	0	1	0	1
Ig kappa chain V-III region SIE	KV302_HUMAN	1	1	1	1	0	0	0	0	0	0	1	1	0	1	0	1	0	0
Ig kappa chain V-III region NG9 (Fragment) PE	KV303_HUMAN	1	0	1	0	0	0	1	1	0	0	0	0	1	1	0	0	0	1
Ig kappa chain V-III region Ti	KV304_HUMAN	0	1	0	0	0	0	0	0	0	0	0	0	0	0	0	1	0	0
Ig kappa chain V-I region WOL	KV305_HUMAN	1	1	0	0	0	0	0	1	0	0	0	0	1	0	0	1	0	0
Ig kappa chain V-III region GOL	KV307_HUMAN	0	0	1	0	1	0	0	0	0	1	0	0	0	1	0	0	0	0
Ig kappa chain V-III region CLL PE	KV308_HUMAN	1	0	1	0	0	0	1	1	0	0	0	0	1	1	0	0	1	1
Ig kappa chain V-III region VG (Fragment) PE	KV309_HUMAN	1	0	1	0	1	0	1	1	0	1	1	0	0	1	0	0	1	1
Ig kappa chain V-III region IARC/BL41	KV311_HUMAN	0	0	1	0	0	0	1	0	0	0	0	0	0	1	0	0	0	1
Ig kappa chain V-III region HAH	KV312_HUMAN	0	0	1	0	0	0	0	0	0	0	0	0	0	1	0	0	0	0
Ig kappa chain V-III region HIC	KV313_HUMAN	1	0	1	0	0	0	0	0	0	0	0	0	0	0	0	1	1	0
Ig kappa chain V-IV region (Fragment)	KV401_HUMAN	1	1	1	0	1	0	1	0	1	0	1	0	0	1	0	1	0	1
Ig kappa chain V-IV region Len PE	KV402_HUMAN	1	0	1	0	0	0	1	1	0	0	0	0	1	1	0	0	0	1
Ig kappa chain Vâ€“IV region B17	KV404_HUMAN	0	0	1	0	0	0	0	0	0	0	0	0	0	0	0	0	1	0
Kyphoscoliosis peptidase	KY_HUMAN	1	0	0	0	0	0	0	0	0	0	0	0	1	0	0	0	0	0
Lethal(2) giant larvae protein homolog 1	L2GL1_HUMAN	0	0	0	0	0	0	1	0	0	0	0	0	0	0	0	0	0	1
Ig lambda chain C regions	LAC_HUMAN	1	1	1	0	1	1	0	0	0	0	0	0	0	0	1	1	1	0
Ig lambda-1 chain C regions	LAC1_HUMAN	1	0	1	0	1	0	0	1	1	1	1	0	0	1	0	0	1	0
Ig lambda-2 chain C regions	LAC2_HUMAN	1	0	1	1	0	0	0	1	0	0	1	1	1	1	0	0	1	0
Ig lambda-3 chain C regions	LAC3_HUMAN	1	0	1	0	1	0	0	1	0	1	0	0	0	0	0	0	1	0
Ig lambda-7 chain C region	LAC7_HUMAN	1	0	0	1	0	0	0	1	0	0	1	1	1	0	0	0	0	0
Alpha-lactalbumin	LALBA_HUMAN	1	1	1	1	1	1	1	1	1	1	1	1	1	1	0	1	1	1
Laminin subunit alpha-3	LAMA3_HUMAN	1	0	0	0	0	0	0	1	0	0	0	0	0	0	0	0	0	0
Laminin subunit alpha-4	LAMA4_HUMAN	1	0	0	0	0	0	0	1	0	0	0	0	0	0	0	0	0	0
Laminin subunit alpha-5	LAMA5_HUMAN	1	0	1	0	0	0	0	1	0	0	0	0	0	1	0	0	0	0
Laminin subunit beta-1	LAMB1_HUMAN	1	0	0	0	1	0	0	1	1	0	0	0	0	0	0	0	0	0
Laminin subunit beta-2	LAMB2_HUMAN	1	0	0	0	0	0	0	1	0	0	0	0	1	0	0	0	0	0
Laminin subunit gamma-1	LAMC1_HUMAN	1	0	0	0	0	0	0	1	0	0	0	0	1	0	0	0	0	0
Lysosome-associated membrane glycoprotein 1	LAMP1_HUMAN	1	0	0	0	0	0	0	1	0	0	0	0	1	0	0	0	0	0
Lysosome-associated membrane glycoprotein 2	LAMP2_HUMAN	1	0	1	0	0	0	0	0	0	0	0	0	1	1	0	0	0	0
LanC-like protein 1	LANC1_HUMAN	1	0	0	0	0	0	1	0	0	0	0	0	1	0	0	0	0	1
LanC-like protein 2	LANC2_HUMAN	0	0	0	0	0	0	1	0	0	0	0	0	0	0	0	0	0	1
La-related protein 1	LARP1_HUMAN	0	0	1	0	0	0	0	0	0	0	0	0	0	1	0	0	0	0
LIM and SH3 domain protein 1	LASP1_HUMAN	1	0	0	0	0	0	1	1	0	0	0	0	1	0	0	0	0	1
Lipopolysaccharide-binding protein	LBP_HUMAN	1	0	0	0	0	0	0	1	0	0	0	0	0	0	0	0	0	0
L-lactate dehydrogenase A chain	LDHA_HUMAN	1	0	1	0	1	0	0	1	1	0	0	0	1	0	0	0	1	0
L-lactate dehydrogenase B chain	LDHB_HUMAN	1	0	1	0	1	0	1	1	1	1	1	0	1	1	0	0	1	1
Galectin-1	LEG1_HUMAN	1	0	0	0	0	0	0	0	0	0	0	0	1	0	0	0	0	0
Galectin-3	LEG3_HUMAN	1	0	1	0	0	0	1	1	0	0	0	0	1	1	0	0	0	1
Galectin-9	LEG9_HUMAN	0	0	0	0	0	0	1	0	0	0	0	0	0	0	0	0	0	1
Galectin-9B	LEG9B_HUMAN	1	0	0	0	0	0	0	1	0	0	0	0	0	0	0	0	0	0
Transmembrane BAX inhibitor motif-containing 1	LFG3_HUMAN	0	0	0	0	1	1	1	0	0	0	0	0	0	0	0	1	0	1
Left-right determination factor 2	LFTY2_HUMAN	0	0	1	0	0	0	0	0	0	0	0	0	0	0	0	0	1	0
Galectin-3-binding protein	LG3BP_HUMAN	1	1	1	1	1	0	1	1	1	1	1	1	1	1	1	1	1	1
Legumain	LGMN_HUMAN	1	0	1	0	1	0	1	1	1	0	0	0	1	1	0	0	1	1
Lactoylglutathione lyase	LGUL_HUMAN	1	0	0	0	0	0	0	0	0	0	0	0	1	0	0	0	0	0
Lipoma HMGIC fusion partner-like 2 protein	LHPL2_HUMAN	0	0	0	0	0	0	1	0	0	0	0	0	0	0	0	0	0	1
Phospholysine phosphohistidine inorganic pyrophosphate phosphatase	LHPP_HUMAN	1	0	0	0	0	0	1	1	0	0	0	0	1	0	0	0	0	1
Lysosomal acid lipase/cholesteryl ester hydrolase	LICH_HUMAN	1	0	0	0	0	0	0	0	0	0	0	0	1	0	0	0	0	0
Lipoprotein lipase	LIPL_HUMAN	1	1	1	1	1	1	1	1	1	1	1	1	1	1	1	1	1	1
Hormone-sensitive lipase	LIPS_HUMAN	0	0	0	0	0	0	1	0	0	0	0	0	0	0	0	0	0	1
Platelet-activating factor acetylhydrolase IB subunit alpha	LIS1_HUMAN	1	0	0	0	0	0	1	0	0	0	0	0	1	0	0	0	0	1
Leukotriene A-4 hydrolase	LKHA4_HUMAN	1	0	1	0	0	0	1	1	0	0	0	0	1	1	0	0	0	1
Protein ERGIC-53	LMAN1_HUMAN	1	0	1	0	0	0	1	0	0	0	0	0	1	0	0	0	1	1
Vesicular integral-membrane protein VIP36	LMAN2_HUMAN	1	0	0	0	0	0	1	0	0	0	0	0	1	0	0	0	0	1
Prelamin-A/C	LMNA_HUMAN	1	0	0	0	0	0	0	0	0	0	0	0	1	0	0	0	0	0
Lysyl oxidase homologue 4	LOXL4_HUMAN	0	0	1	0	0	0	0	0	0	0	0	0	0	0	0	0	1	0
Leucine-rich repeat-containing protein 16A	LR16A_HUMAN	0	0	0	0	0	0	1	0	0	0	0	0	0	0	0	0	0	1
leucine-rich repeat-containing protein 16C	LR16C_HUMAN	0	0	0	1	0	0	0	0	0	0	1	1	0	0	0	0	0	0
Leucine-rich repeat-containing protein 26	LRC26_HUMAN	1	0	1	0	0	0	1	0	0	0	0	0	1	1	0	0	0	1
Leucine-rich repeat-containing protein 47	LRC47_HUMAN	1	0	0	0	0	0	0	0	0	0	0	0	1	0	0	0	0	0
Leucine-rich repeat-containing protein 57	LRC57_HUMAN	0	0	0	0	0	0	1	0	0	0	0	0	0	0	0	0	0	1
Leucine-rich repeat-containing protein 59	LRC59_HUMAN	0	0	1	0	0	0	1	0	0	0	0	0	0	1	0	0	0	1
Leucine-rich repeat-containing protein 8E	LRC8E_HUMAN	1	0	0	0	0	0	0	1	0	0	0	0	0	0	0	0	0	0
Leucine-rich repeat and IQ domain-containing protein 1	LRIQ1_HUMAN	0	0	1	0	0	0	0	0	0	0	0	0	0	1	0	0	0	0
Lymphoid-restricted membrane protein	LRMP_HUMAN	0	0	0	0	0	0	1	0	0	0	0	0	0	0	0	0	0	1
Prolow-density lipoprotein receptor-related protein 1	LRP1_HUMAN	0	0	0	0	0	0	1	0	0	0	0	0	0	0	0	0	0	1
Low-density lipoprotein receptor-related protein 2	LRP2_HUMAN	1	0	1	0	0	0	0	1	0	0	0	0	0	1	0	0	0	0
Leucine-rich repeat-containing protein 7	LRRC7_HUMAN	1	0	0	0	0	0	0	1	0	0	0	0	0	0	0	0	0	0
Leucine-rich repeat flightless-interacting protein 1	LRRF1_HUMAN	1	0	0	0	0	0	0	0	0	0	0	0	1	0	0	0	0	0
Leucine-rich repeat flightless-interacting protein 2	LRRF2_HUMAN	1	0	0	0	0	0	0	0	0	0	0	0	0	0	0	1	0	0
Lipolysis-stimulated lipoprotein receptor	LSR_HUMAN	1	0	1	0	0	0	1	1	0	0	0	0	1	0	0	0	1	1
Latent-transforming growth factor beta-binding protein 1	LTBP1_HUMAN	1	0	0	0	0	0	0	1	0	0	0	0	1	0	0	0	0	0
Latent-transforming growth factor beta-binding protein 4	LTBP4_HUMAN	1	0	0	0	0	0	0	0	0	0	0	0	1	0	0	0	0	0
Ragulator complex protein LAMTOR1	LTOR1_HUMAN	0	0	0	0	0	0	1	0	0	0	0	0	0	0	0	0	0	1
Protein LTV1 homolog	LTV1_HUMAN	0	0	0	0	0	0	1	0	0	0	0	0	0	0	0	0	0	1
Lumican	LUM_HUMAN	1	0	1	0	0	0	0	1	0	0	0	0	1	1	0	0	0	0
Ig lambda chain V region 4A	LV001_HUMAN	0	0	1	0	0	0	1	0	0	0	0	0	0	1	0	0	0	1
Ig lambda chain V-I region VOR PE	LV101_HUMAN	1	0	0	0	0	0	0	1	0	0	0	0	0	0	0	0	0	0
Ig lambda chain V-I region HA PE	LV102_HUMAN	1	0	1	0	0	0	1	1	0	0	1	0	1	0	0	1	1	1
Ig lambda chain V-I region NEW PE	LV103_HUMAN	1	0	1	0	0	0	1	1	0	0	0	0	1	1	0	0	0	1
Ig lambda chain V-I region NIG-64	LV104_HUMAN	1	0	0	0	0	0	1	0	0	0	0	0	1	0	0	0	0	1
Ig lambda chain V-I region NEWM PE	LV105_HUMAN	1	0	1	0	0	0	1	1	0	0	0	0	1	0	0	0	1	1
Ig lambda chain V-I region WAH PE	LV106_HUMAN	1	0	1	0	0	0	1	1	0	0	0	0	0	1	0	0	1	1
Ig lambda chain V-I region EPS PE	LV109_HUMAN	1	0	0	0	0	0	0	1	0	0	0	0	0	0	0	0	0	0
Ig lambda chain V-II region NEI PE	LV202_HUMAN	1	0	0	0	0	0	0	1	0	0	0	0	0	0	0	0	0	0
Ig lambda chain V-II region TRO PE	LV204_HUMAN	1	0	0	0	0	0	0	1	0	0	0	0	1	0	0	0	0	0
Ig lambda chain V-II region BUR	LV205_HUMAN	0	0	1	0	0	0	0	0	0	0	0	0	0	1	0	0	0	0
Ig lambda chain V-II region NIG-84	LV211_HUMAN	0	0	1	0	0	0	0	0	0	0	0	0	0	1	0	0	0	0
Ig lamba chain V-III region	LV301_HUMAN	1	1	1	0	0	0	1	1	0	0	1	0	1	1	0	1	1	1
Ig lambda chain V-III region	LV302_HUMAN	1	1	1	0	0	0	1	1	0	0	1	0	1	1	0	1	1	1
Ig lambda chain V-IV region Bau	LV401_HUMAN	0	0	0	0	0	0	1	0	0	0	0	0	0	0	0	0	0	1
Ig lamba chain V-IV	LV403_HUMAN	1	1	1	0	0	0	1	1	0	0	1	0	0	1	0	1	1	1
Ig lambda chain V-V region DEL PE	LV501_HUMAN	1	0	1	0	0	0	0	1	0	0	0	0	0	1	0	0	0	0
Ig lambda chain V-VI region AR	LV601_HUMAN	1	0	1	0	0	0	0	0	0	0	0	0	0	1	0	1	0	0
Ig lambda chain V-VI region SUT	LV603_HUMAN	1	0	1	0	0	0	0	0	0	0	0	0	1	1	0	0	0	0
Ig lambda chain V-VI region EB4	LV605_HUMAN	0	0	0	0	0	0	1	0	0	0	0	0	0	0	0	0	0	1
Lymphocyte antigen 6D	LY6D_HUMAN	1	0	0	0	1	0	0	1	0	0	0	0	0	0	0	1	0	0
Lymphocyte antigen 96	LY96_HUMAN	1	0	1	0	0	0	1	1	0	0	0	0	1	1	0	0	0	1
Lysosomal alpha-glucosidase	LYAG_HUMAN	1	0	0	0	0	0	0	1	0	0	0	0	1	0	0	0	0	0
Tyrosine-protein kinase Lyn	LYN_HUMAN	1	0	1	0	1	1	0	0	0	0	0	0	1	1	0	1	0	0
Protein-lysine 6-oxidase	LYOX_HUMAN	1	0	0	0	0	0	0	1	0	0	0	0	0	0	0	0	0	0
Acyl-protein thioesterase 1	LYPA1_HUMAN	1	0	0	0	0	0	1	1	0	0	0	0	1	0	0	0	0	1
Acyl-protein thioesterase 2	LYPA2_HUMAN	1	0	0	0	0	0	1	0	0	0	0	0	1	0	0	0	0	1
Ly6/PLAUR domain-containing protein 3	LYPD3_HUMAN	1	0	0	0	0	0	0	1	0	0	0	0	1	0	0	0	0	0
Lysophospholipase-like protein 1	LYPL1_HUMAN	0	0	0	0	0	0	1	0	0	0	0	0	0	0	0	0	0	1
Lysozyme C	LYSC_HUMAN	1	0	1	1	1	0	1	1	1	1	1	1	1	1	1	1	1	1
Lymphatic vessel endothelial hyaluronic acid receptor 1	LYVE1_HUMAN	1	0	0	0	0	0	0	1	0	0	0	0	0	0	0	0	0	0
Protein LZIC	LZIC_HUMAN	1	0	0	0	0	0	0	0	0	0	0	0	1	0	0	0	0	0
Mannosyl-oligosaccharide 12-alpha-mannosidase IA	MA1A1_HUMAN	1	0	1	0	0	0	1	1	0	0	0	0	1	1	0	0	1	1
Alpha-mannosidase 2	MA2A1_HUMAN	1	0	0	0	0	0	1	1	0	0	0	0	1	0	0	0	0	1
Lysosomal alpha-mannosidase	MA2B1_HUMAN	1	0	1	0	0	0	0	0	0	0	0	0	1	1	0	0	0	0
Epididymis-specific alpha-mannosidase	MA2B2_HUMAN	1	0	1	0	0	0	1	0	0	0	0	0	1	1	0	0	0	1
Alpha-mannosidase 2C1	MA2C1_HUMAN	0	0	1	0	0	0	0	0	0	0	0	0	0	1	0	0	0	0
Maleylacetoacetate isomerase	MAAI_HUMAN	1	0	0	0	0	0	0	0	0	0	0	0	1	0	0	0	0	0
Microtubule-actin cross-linking factor 1 isoforms 1/2/3/5	MACF1_HUMAN	1	0	0	0	0	0	0	1	0	0	0	0	1	0	0	0	0	0
Microtubule-actin cross-linking factor 1 isoform 4	MACF4_HUMAN	0	0	1	0	0	0	0	0	0	0	0	0	0	1	0	0	0	0
Magnesium transporter protein 1	MAGT1_HUMAN	0	0	0	0	0	0	1	0	0	0	0	0	0	0	0	0	0	1
Protein MAL2	MAL2_HUMAN	0	0	0	0	1	0	1	0	0	0	0	0	0	0	0	1	0	1
MARVEL domain-containing protein 3	MALD3_HUMAN	0	0	0	0	0	0	1	0	0	0	0	0	0	0	0	0	0	1
Beta-mannosidase	MANBA_HUMAN	1	0	0	0	0	0	1	1	0	0	0	0	1	0	0	0	0	1
Mesencephalic astrocyte-derived neurotrophic factor	MANF_HUMAN	0	0	0	0	0	0	1	0	0	0	0	0	0	0	0	0	0	1
NADP-dependent malic enzyme	MAOX_HUMAN	1	0	1	0	0	0	1	0	0	0	0	0	1	1	0	0	0	1
Microtubule-associated protein 2	MAP2_HUMAN	1	0	0	0	0	0	0	1	0	0	0	0	0	0	0	0	0	0
Myristoylated alanine-rich C-kinase substrate	MARCS_HUMAN	1	1	0	0	1	1	0	1	0	0	0	0	1	0	0	1	0	0
Microtubule-associated protein RP/EB family member 1	MARE1_HUMAN	0	0	0	0	0	0	1	0	0	0	0	0	0	0	0	0	0	1
Serine/threonine-protein kinase MARK1	MARK1_HUMAN	0	0	1	0	0	0	0	0	0	0	0	0	0	1	0	0	0	0
Matrilin-2	MATN2_HUMAN	1	0	1	0	0	0	1	1	0	0	0	0	1	1	0	0	0	1
Matrilin-3	MATN3_HUMAN	1	0	1	0	1	0	0	1	0	1	0	0	1	0	0	0	1	0
Metallo-beta-lactamase domain-containing protein 2	MBLC2_HUMAN	0	0	0	0	0	0	1	0	0	0	0	0	0	0	0	0	0	1
Lysophospholipid acyltransferase 5	MBOA5_HUMAN	0	0	0	0	0	0	1	0	0	0	0	0	0	0	0	0	0	1
Lysophospholipid acyltransferase 7	MBOA7_HUMAN	0	0	0	0	0	0	1	0	0	0	0	0	0	0	0	0	0	1
Myelin basic protein	MBP_HUMAN	1	0	0	0	0	0	0	0	0	0	0	0	1	0	0	0	0	0
Eukaryotic translation elongation factor 1 epsilon-1	MCA3_HUMAN	1	0	0	0	0	0	1	1	0	0	0	0	0	0	0	0	0	1
Malignant T cell-amplified sequence 1	MCTS1_HUMAN	1	0	0	0	0	0	1	0	0	0	0	0	1	0	0	0	0	1
Mediator of RNA polymerase II transcription subunit 12-like protein	MD12L_HUMAN	0	0	1	0	0	0	0	0	0	0	0	0	0	1	0	0	0	0
MAM domain-containing glycosylphosphatidylinositol anchor protein 2	MDGA2_HUMAN	1	0	0	0	0	0	0	1	0	0	0	0	0	0	0	0	0	0
Malate dehydrogenase cytoplasmic	MDHC_HUMAN	1	0	1	1	1	0	1	1	1	0	0	1	1	1	0	0	1	1
Malate dehydrogenase mitochondrial	MDHM_HUMAN	1	0	0	0	0	0	1	1	0	0	0	0	1	0	0	0	0	1
Midasin	MDN1_HUMAN	1	1	1	0	0	0	0	0	0	0	0	0	0	1	0	1	0	0
Multiple epidermal growth factor-like domains protein 8	MEGF8_HUMAN	1	0	0	0	0	0	0	1	0	0	0	0	0	0	0	0	0	0
UPF0623 protein	MEI4L_HUMAN	0	0	1	0	0	0	0	0	0	0	0	0	0	1	0	0	0	0
Meprin A subunit alpha	MEP1A_HUMAN	1	0	0	0	0	0	0	1	0	0	0	0	0	0	0	0	0	0
LDLR chaperone MESD	MESD_HUMAN	1	0	0	0	0	0	1	0	0	0	0	0	1	0	0	0	0	1
Methyltransferase-like protein 7A	MET7A_HUMAN	1	0	0	0	1	0	1	0	1	1	0	0	1	0	0	0	0	1
S-adenosylmethionine synthase isoform type-2	METK2_HUMAN	1	0	0	0	0	0	1	0	0	0	0	0	1	0	0	0	0	1
Lactadherin	MFGM_HUMAN	1	1	1	1	1	1	1	1	1	1	1	1	1	1	1	1	1	1
Mitoferrin-2	MFRN2_HUMAN	0	0	1	0	0	0	0	0	0	0	0	0	0	1	0	0	0	0
MAX gene-associated protein	MGAP_HUMAN	0	0	1	0	0	0	0	0	0	0	0	0	0	1	0	0	0	0
Alpha-13-mannosyl-glycoprotein 2-beta-N-acetylglucosaminyltransferase	MGAT1_HUMAN	1	0	0	0	0	0	1	1	0	0	0	0	1	0	0	0	0	1
Magnesium-dependent phosphatase 1	MGDP1_HUMAN	0	0	0	0	0	0	1	0	0	0	0	0	0	0	0	0	0	1
Matrix-GIa protein	MGP_HUMAN	0	0	1	0	0	0	0	0	0	0	0	0	0	0	0	0	1	0
Microsomal glutathione S-transferase 1	MGST1_HUMAN	0	0	0	0	0	0	1	0	0	0	0	0	0	0	0	0	0	1
Microsomal glutathione S-transferase 2	MGST2_HUMAN	0	0	0	0	0	0	1	0	0	0	0	0	0	0	0	0	0	1
Melanoma inhibitory activity protein 3	MIA3_HUMAN	1	0	0	0	0	0	0	0	0	0	0	0	1	0	0	0	0	0
Protein-methionine sulfoxide oxidase MICAL3	MICA3_HUMAN	0	0	0	0	0	0	1	0	0	0	0	0	0	0	0	0	0	1
EF-hand domain-containing family member A2	MICU3_HUMAN	0	0	1	0	0	0	0	0	0	0	0	0	0	1	0	0	0	0
Macrophage migration inhibitory factor	MIF_HUMAN	1	0	1	0	0	0	1	1	0	0	0	0	0	1	0	0	1	1
Multiple inositol polyphosphate phosphatase 1	MINP1_HUMAN	1	0	1	0	0	0	1	0	0	0	0	0	1	0	0	0	1	1
Msx2-interacting protein	MINT_HUMAN	0	0	1	0	0	0	0	0	0	0	0	0	0	1	0	0	0	0
Midkine	MK_HUMAN	1	0	1	0	0	0	1	0	0	0	0	0	1	0	0	0	1	1
Mitogen-activated protein kinase 1	MK01_HUMAN	1	0	0	0	0	0	1	1	0	0	0	0	1	0	0	0	0	1
Mitogen-activated protein kinase 13	MK13_HUMAN	1	0	0	0	0	0	1	0	0	0	0	0	1	0	0	0	0	1
Myosin regulatory light chain 12A	ML12A_HUMAN	1	0	0	0	0	0	0	0	0	0	0	0	1	0	0	0	0	0
Myosin regulatory light chain 12B	ML12B_HUMAN	0	0	0	0	0	0	1	0	0	0	0	0	0	0	0	0	0	1
Malectin	MLEC_HUMAN	0	0	0	0	0	0	1	0	0	0	0	0	0	0	0	0	0	1
Membrane metallo-endopeptidase-like 1	MMEL1_HUMAN	0	0	1	0	0	0	0	0	0	0	0	0	0	1	0	0	0	0
72 kDa type IV collagenase	MMP2_HUMAN	0	0	0	0	0	0	1	0	0	0	0	0	0	0	0	0	0	1
Matrilysin	MMP7_HUMAN	1	0	1	0	0	0	0	0	0	0	0	0	1	1	0	0	0	0
Uncharacterized protein C6orf167	MMS22_HUMAN	0	0	1	0	0	0	0	0	0	0	0	0	0	1	0	0	0	0
MOB kinase activator 1B	MOB1B_HUMAN	0	0	0	0	0	0	1	0	0	0	0	0	0	0	0	0	0	1
Moesin	MOES_HUMAN	1	0	1	0	1	0	1	1	1	1	0	0	1	1	0	0	1	1
Mannosyl-oligosaccharide glucosidase	MOGS_HUMAN	0	0	0	0	0	0	1	0	0	0	0	0	0	0	0	0	0	1
Monocarboxylate transporter 1	MOT1_HUMAN	0	0	0	0	1	1	1	0	0	0	0	0	0	0	0	1	0	1
Dual specificity mitogen-activated protein kinase kinase 1	MP2K1_HUMAN	1	0	0	0	0	0	1	0	0	0	0	0	1	0	0	0	0	1
Dual specificity mitogen-activated protein kinase kinase 2	MP2K2_HUMAN	0	0	0	0	0	0	1	0	0	0	0	0	0	0	0	0	0	1
Mannose-6-phosphate isomerase	MPI_HUMAN	1	0	0	0	0	0	1	1	0	0	0	0	1	0	0	0	0	1
Cation-independent mannose-6-phosphate receptor	MPRI_HUMAN	1	0	1	0	0	0	0	1	0	0	0	0	1	1	0	0	1	0
Mannose-P-dolichol utilization defect 1 protein	MPU1_HUMAN	0	0	0	0	0	0	1	0	0	0	0	0	0	0	0	0	0	1
Macrophage mannose receptor 1	MRC1_HUMAN	1	1	1	1	1	0	1	1	1	1	1	1	1	0	0	1	1	1
Macrophage mannose receptor 1-like protein 1	MRC1L_HUMAN	0	0	1	0	0	0	0	0	0	0	0	0	0	1	0	0	1	0
Serine/threonine-protein kinase MRCK alpha	MRCKA_HUMAN	0	0	1	0	0	0	0	0	0	0	0	0	0	1	0	0	0	0
MARCKS-related protein	MRP_HUMAN	1	0	0	0	1	1	0	1	0	1	0	0	1	0	0	1	0	0
Multidrug resistance-associated protein 4	MRP4_HUMAN	0	0	0	0	0	0	1	0	0	0	0	0	0	0	0	0	0	1
Multidrug resistance-associated protein 7	MRP7_HUMAN	1	0	0	0	0	0	0	0	0	0	0	0	1	0	0	0	0	0
Methylsterol monooxygenase 1	MSMO1_HUMAN	0	0	0	0	0	0	1	0	0	0	0	0	0	0	0	0	0	1
Mitochondrial peptide methionine sulfoxide reductase	MSRA_HUMAN	1	0	0	0	0	0	1	0	0	0	0	0	1	0	0	0	0	1
S-methyl-5'-thioadenosine phosphorylase	MTAP_HUMAN	1	0	0	0	0	0	1	1	0	0	0	0	1	0	0	0	0	1
Methenyltetrahydrofolate synthase domain-containing protein	MTHSD_HUMAN	0	0	0	0	0	0	1	0	0	0	0	0	0	0	0	0	0	1
Myotubularin	MTM1_HUMAN	0	0	0	0	0	0	1	0	0	0	0	0	0	0	0	0	0	1
1-phosphatidylinositol-3-phosphate 5-kinase	MTMR6_HUMAN	0	0	1	0	0	0	0	0	0	0	0	0	0	1	0	0	0	0
Myotubularin-related protein 13	MTMRD_HUMAN	0	0	1	0	0	0	0	0	0	0	0	0	0	1	0	0	0	0
Methylthioribose-1-phosphate isomerase	MTNA_HUMAN	0	0	0	0	0	0	1	0	0	0	0	0	0	0	0	0	0	1
Myotrophin	MTPN_HUMAN	1	0	0	0	0	0	0	0	0	0	0	0	1	0	0	0	0	0
Metaxin-3	MTX3_HUMAN	0	0	1	0	0	0	0	0	0	0	0	0	0	1	0	0	0	0
Mucin-1	MUC1_HUMAN	1	1	1	1	1	1	1	1	1	1	1	1	1	1	1	1	1	1
Mucin-15	MUC15_HUMAN	0	0	0	0	0	0	1	0	0	0	0	0	0	0	0	0	0	1
Mucin-16	MUC16_HUMAN	1	0	1	0	0	0	0	0	0	0	1	0	0	1	0	0	0	0
Cell surface glycoprotein MUC18	MUC18_HUMAN	1	0	0	0	0	0	0	0	0	0	0	0	1	0	0	0	0	0
Mucin-20	MUC20_HUMAN	1	0	1	0	0	0	0	1	0	0	0	0	1	1	0	0	0	0
Mucin-4	MUC4_HUMAN	1	0	1	1	1	0	1	1	1	1	1	1	1	1	0	0	1	1
Mucin-5B	MUC5B_HUMAN	1	1	1	0	0	0	0	1	0	0	0	0	0	0	1	1	0	0
Ig mu heavy chain disease protein PE	MUCB_HUMAN	1	1	1	0	0	0	1	1	0	0	0	0	1	1	0	1	0	1
Mucin-like protein 1	MUCL1_HUMAN	1	0	0	0	0	0	0	1	0	0	0	0	1	0	0	0	0	0
Diphosphomevalonate decarboxylase	MVD1_HUMAN	1	0	0	0	0	0	1	1	0	0	0	0	1	0	0	0	0	1
Major vault protein	MVP_HUMAN	0	0	1	0	0	0	1	0	0	0	0	0	0	1	0	0	0	1
Myeloid-associated differentiation marker	MYADM_HUMAN	0	0	0	0	1	1	1	0	0	0	0	0	0	0	0	1	0	1
probable E3 ubiquitin-protein ligase MYCBP2	MYCB2_HUMAN	1	0	1	0	0	0	1	0	0	0	1	0	0	1	0	0	0	1
UPF0160 protein MYG1 mitochondrial	MYG1_HUMAN	0	0	0	0	0	0	1	0	0	0	0	0	0	0	0	0	0	1
Myosin-11	MYH11_HUMAN	0	0	1	0	0	0	1	0	0	0	0	0	0	1	0	0	0	1
Cluster of Myosin-13	MYH13_HUMAN	0	0	0	0	0	0	1	0	0	0	0	0	0	0	0	0	0	1
Myosin-14	MYH14_HUMAN	0	0	1	0	0	0	1	0	0	0	0	0	0	1	0	0	0	1
Myosin-9	MYH9_HUMAN	1	0	1	0	1	0	1	1	0	1	0	0	1	1	0	0	0	1
Myosin light polypeptide 6	MYL6_HUMAN	1	0	1	0	0	0	1	1	0	0	0	0	1	1	0	0	0	1
Myosin-XV	MYO15_HUMAN	0	0	1	0	0	0	0	0	0	0	0	0	0	1	0	0	0	0
Myosin-Ic	MYO1C_HUMAN	1	0	0	0	0	0	1	1	0	0	0	0	1	0	0	0	0	1
Unconventional myosin-Id	MYO1D_HUMAN	0	0	0	0	0	0	1	0	0	0	0	0	0	0	0	0	0	1
Myosin-Ig	MYO1G_HUMAN	0	0	1	0	0	0	0	0	0	0	0	0	0	1	0	0	0	0
Myosin-IIIa	MYO3A_HUMAN	0	0	0	0	0	0	1	0	0	0	0	0	0	0	0	0	0	1
Myosin-VI	MYO6_HUMAN	1	0	0	0	0	0	1	1	0	0	0	0	0	0	0	0	0	1
Myosin-IXa	MYO9A_HUMAN	0	0	1	0	0	0	0	0	0	0	0	0	0	0	0	0	1	0
Myosin-IXb	MYO9B_HUMAN	0	0	1	0	0	0	0	0	0	0	0	0	0	1	0	0	0	0
Myoferlin	MYOF_HUMAN	1	0	0	0	1	1	1	1	0	0	0	0	1	0	0	1	0	1
Myomesin-1	MYOM1_HUMAN	1	0	0	0	0	0	0	1	0	0	0	0	0	0	0	0	0	0
N-alpha-acetyltransferase 15 NatA auxiliary subunit	NAA15_HUMAN	1	0	0	0	0	0	0	0	0	0	0	0	1	0	0	0	0	0
N-alpha-acetyltransferase 16 NatA auxiliary subunit	NAA16_HUMAN	1	0	0	0	0	0	0	1	0	0	0	0	0	0	0	0	0	0
N-alpha-acetyltransferase 50	NAA50_HUMAN	0	0	0	0	0	0	1	0	0	0	0	0	0	0	0	0	0	1
Nascent polypeptide-associated complex subunit alpha	NACA_HUMAN	1	0	0	0	0	0	1	1	0	0	0	0	1	0	0	0	0	1
Nicotinate-nucleotide pyrophosphorylase [carboxylating]	NADC_HUMAN	1	0	0	0	0	0	0	1	0	0	0	0	1	0	0	0	0	0
Putative N-acetylglucosamine-6-phosphate deacetylase	NAGA_HUMAN	0	0	0	0	0	0	1	0	0	0	0	0	0	0	0	0	0	1
N-acetyl-D-glucosamine kinase	NAGK_HUMAN	1	0	1	0	0	0	1	1	0	0	0	0	1	1	0	0	1	1
Nicotinamide phosphoribosyltransferase	NAMPT_HUMAN	1	0	1	0	1	0	1	1	1	1	0	0	1	1	0	0	1	1
N-acetyltransferase 10	NAT10_HUMAN	1	0	0	0	0	0	0	0	0	0	0	0	1	0	0	0	0	0
NADH-cytochrome b5 reductase 1	NB5R1_HUMAN	0	0	0	0	0	0	1	0	0	0	0	0	0	0	0	0	0	1
Nck-associated protein 5-like	NCK5L_HUMAN	1	0	0	0	0	0	0	1	0	0	0	0	0	0	0	0	0	0
Nck-associated protein 1	NCKP1_HUMAN	0	0	0	0	0	0	1	0	0	0	0	0	0	0	0	0	0	1
Nicalin	NCLN_HUMAN	0	0	0	0	0	0	1	0	0	0	0	0	0	0	0	0	0	1
NADPH--cytochrome P450 reductase	NCPR_HUMAN	0	0	0	0	0	0	1	0	0	0	0	0	0	0	0	0	0	1
Non-specific cytotoxic cell receptor protein 1 homolog	NCRP1_HUMAN	1	0	0	0	0	0	0	1	0	0	0	0	1	0	0	0	0	0
Nucleoside diphosphate kinase 3	NDK3_HUMAN	1	0	0	0	0	0	1	1	0	0	0	0	0	0	0	0	0	1
Nucleoside diphosphate kinase A	NDKA_HUMAN	1	0	1	0	1	0	1	1	1	0	0	0	1	1	0	0	0	1
Nucleoside diphosphate kinase B	NDKB_HUMAN	1	0	1	0	0	0	1	1	0	0	0	0	1	1	0	0	1	1
Protein NDRG1	NDRG1_HUMAN	1	0	0	0	1	0	1	0	0	0	0	0	1	0	0	1	0	1
Protein NDRG2	NDRG2_HUMAN	1	0	1	0	0	0	1	1	0	0	0	0	1	0	0	0	1	1
Protein NDRG3	NDRG3_HUMAN	1	0	0	0	0	0	0	0	0	0	0	0	1	0	0	0	0	0
Bifunctional heparan sulfate N-deacetylase/N-sulfotransferase 1	NDST1_HUMAN	1	0	0	0	0	0	0	0	0	0	0	0	1	0	0	0	0	0
NADH dehydrogenase [ubiquinone] 1 beta subcomplex subunit 11 mitochondrial	NDUBB_HUMAN	0	0	0	0	0	0	1	0	0	0	0	0	0	0	0	0	0	1
NADH dehydrogenase [ubiquinone] iron-sulfur protein 7 mitochondrial	NDUS7_HUMAN	0	0	0	0	0	0	1	0	0	0	0	0	0	0	0	0	0	1
Neurabin-1	NEB1_HUMAN	1	0	0	0	0	0	0	1	0	0	0	0	0	0	0	0	0	0
Nebulette	NEBL_HUMAN	0	0	1	0	0	0	0	0	0	0	0	0	0	1	0	0	0	0
Nebulin	NEBU_HUMAN	1	0	1	0	0	0	0	0	0	0	0	0	1	1	0	0	0	0
NEDD8	NEDD8_HUMAN	0	0	0	0	0	0	1	0	0	0	0	0	0	0	0	0	0	1
Serine/threonine-protein kinase Nek5	NEK5_HUMAN	0	0	1	0	0	0	0	0	0	0	0	0	0	1	0	0	0	0
Serine/threonine-protein kinase Nek9	NEK9_HUMAN	0	0	0	0	0	0	1	0	0	0	0	0	0	0	0	0	0	1
Protein kinase C-binding protein	NELL2_HUMAN	0	0	1	0	1	1	0	0	1	0	0	0	0	0	1	1	0	0
Neudesin	NENF_HUMAN	1	0	0	0	0	0	0	0	0	0	0	0	1	0	0	0	0	0
Neogenin	NEO1_HUMAN	1	0	0	0	0	0	0	0	0	0	0	0	1	0	0	0	0	0
Neuropilin and tolloid-like protein 1	NETO1_HUMAN	0	0	0	0	0	0	1	0	0	0	0	0	0	0	0	0	0	1
Sialidase-1	NEUR1_HUMAN	1	0	0	0	0	0	1	1	1	0	0	0	1	0	0	0	0	1
Neuroserpin	NEUS_HUMAN	1	0	1	0	0	0	1	1	0	0	0	0	1	1	0	0	0	1
Cysteine desulfurase mitochondrial	NFS1_HUMAN	0	0	1	0	0	0	0	0	0	0	0	0	0	0	0	0	1	0
Neutrophil gelatinase-associated lipocalin	NGAL_HUMAN	1	0	1	0	0	0	0	1	0	0	0	0	1	0	1	0	0	0
NHL repeat-containing protein 2	NHLC2_HUMAN	1	0	0	0	0	0	0	0	0	0	0	0	1	0	0	0	0	0
Na(+)/H(+) exchange regulatory cofactor NHE-RF1	NHRF1_HUMAN	1	0	1	0	1	0	1	1	0	1	0	0	1	1	0	0	1	1
Na(+)/H(+) exchange regulatory cofactor NHE-RF2	NHRF2_HUMAN	1	0	0	0	0	0	1	0	0	0	0	0	1	0	0	0	0	1
Niban-like protein 1	NIBL1_HUMAN	1	0	1	0	0	0	1	0	0	0	0	0	1	1	0	0	0	1
Nicastrin	NICA_HUMAN	0	0	0	0	1	1	0	0	0	0	0	0	0	0	0	1	0	0
Nidogen-1	NID1_HUMAN	1	0	1	0	0	0	0	1	0	0	0	0	1	0	0	0	1	0
Protein NipSnap homolog 2	NIPS2_HUMAN	0	0	0	0	0	0	1	0	0	0	0	0	0	0	0	0	0	1
Nitrilase homolog 1	NIT1_HUMAN	0	0	0	0	0	0	1	0	0	0	0	0	0	0	0	0	0	1
Omega-amidase NIT2	NIT2_HUMAN	1	0	0	0	0	0	1	1	0	0	0	0	1	0	0	0	0	1
NK-tumor recognition protein	NKTR_HUMAN	0	0	0	0	0	0	1	0	0	0	0	0	0	0	0	0	0	1
Protein NLRC5	NLRC5_HUMAN	1	0	1	0	0	0	0	1	0	0	0	0	0	1	0	0	0	0
Non-specific lipid-transfer protein	NLTP_HUMAN	1	0	1	0	1	0	1	0	1	1	0	0	1	1	0	0	0	1
Glycylpeptide N-tetradecanoyltransferase 1	NMT1_HUMAN	1	0	1	0	0	0	1	0	0	0	0	0	1	1	0	0	0	1
NAD(P)H-hydrate epimerase	NNRE_HUMAN	0	0	0	0	0	0	1	0	0	0	0	0	0	0	0	0	0	1
Nucleolar protein 3	NOL3_HUMAN	1	0	0	0	0	0	0	0	0	0	0	0	1	0	0	0	0	0
Nodal modulator 1	NOMO1_HUMAN	1	0	0	0	0	0	1	1	0	0	0	0	1	0	0	0	0	1
Nucleosome assembly protein 1-like 1	NP1L1_HUMAN	1	0	0	0	0	0	1	0	0	0	0	0	1	0	0	0	0	1
Nucleosome assembly protein 1-like 4	NP1L4_HUMAN	1	0	0	0	0	0	1	0	0	0	0	0	1	0	0	0	0	1
Epididymal secretory protein E1	NPC2_HUMAN	1	1	1	0	1	0	1	1	1	0	0	0	1	1	0	1	0	1
Neural proliferation differentiation and control protein 1	NPDC1_HUMAN	1	0	0	0	0	0	0	1	0	0	0	0	1	0	0	0	0	0
Nephrocystin-1	NPHP1_HUMAN	1	0	0	0	0	0	0	1	0	0	0	0	0	0	0	0	0	0
Nephronectin	NPNT_HUMAN	1	0	1	0	0	0	1	1	0	0	0	0	1	1	0	0	1	1
Sodium-dependent phosphate transport protein 2B	NPT2B_HUMAN	1	0	0	0	1	1	1	1	1	0	0	0	1	0	0	1	0	1
Neuroplastin	NPTN_HUMAN	0	1	0	0	1	1	1	0	0	0	0	0	0	0	0	1	0	1
Ribosyldihydronicotinamide dehydrogenase [quinone]	NQO2_HUMAN	1	0	0	0	0	0	0	0	0	0	0	0	1	0	0	0	0	0
Natural cytotoxicity triggering receptor 3 ligand 1	NR3L1_HUMAN	1	0	0	0	0	0	1	0	0	0	0	0	1	0	0	0	0	1
UPF0614 protein C14orf102	NRDE2_HUMAN	0	0	1	0	0	0	0	0	0	0	0	0	0	1	0	0	0	0
Neuropilin-1	NRP1_HUMAN	1	0	1	0	0	0	0	1	0	0	0	0	1	0	1	0	0	0
Sterol-4-alpha-carboxylate 3-dehydrogenase	NSDHL_HUMAN	0	1	0	0	1	1	1	0	0	1	0	0	0	0	0	1	0	1
Vesicle-fusing ATPase	NSF_HUMAN	1	0	0	0	0	0	1	0	0	0	0	0	1	0	0	0	0	1
NSFL1 cofactor p47	NSF1C_HUMAN	1	0	0	0	0	0	1	0	0	0	0	0	1	0	0	0	0	1
Putative methyltransferase NSUN7	NSUN7_HUMAN	1	0	0	0	0	0	0	1	0	0	0	0	0	0	0	0	0	0
5'-nucleotidase domain-containing protein 1	NT5D1_HUMAN	1	0	0	0	0	0	0	0	0	0	0	0	1	0	0	0	0	0
Nuclear transport factor 2	NTF2_HUMAN	1	0	0	0	0	0	1	0	0	0	0	0	1	0	0	0	0	1
Nucleoporin Nup160	NU160_HUMAN	0	0	0	0	1	0	0	0	0	0	0	0	0	0	0	1	0	0
Nucleoporin NUP188 homolog	NU188_HUMAN	0	0	1	0	0	0	0	0	0	0	0	0	0	1	0	0	0	0
Cytosolic Fe-S cluster assembly factor NUBP1	NUBP1_HUMAN	1	0	0	0	0	0	0	0	0	0	0	0	1	0	0	0	0	0
Nucleobindin-1	NUCB1_HUMAN	1	0	1	0	1	0	1	1	1	0	0	0	1	1	1	0	1	1
Nucleobindin-2	NUCB2_HUMAN	1	0	1	0	1	0	1	1	0	1	0	0	1	1	1	0	1	1
Nucleolin	NUCL_HUMAN	0	0	1	0	0	0	0	0	0	0	0	0	0	0	0	0	1	0
Uridine diphosphate glucose pyrophosphatase	NUD14_HUMAN	1	0	0	0	0	0	0	1	0	0	0	0	0	0	0	0	0	0
Nuclear migration protein nudC	NUDC_HUMAN	1	0	0	0	0	0	0	0	0	0	0	0	1	0	0	0	0	0
Diphosphoinositol polyphosphate phosphohydrolase 1	NUDT3_HUMAN	0	0	0	0	0	0	1	0	0	0	0	0	0	0	0	0	0	1
ADP-sugar pyrophosphatase	NUDT5_HUMAN	1	0	0	0	0	0	1	1	0	0	0	0	1	0	0	0	0	1
Nucleoporin Nup93	NUP93_HUMAN	0	1	0	0	0	0	0	0	0	0	0	0	0	0	0	1	0	0
Protein NOXP20	NXP20_HUMAN	1	0	0	0	0	0	0	0	0	0	0	0	1	0	0	0	0	0
Obscurin	OBSCN_HUMAN	1	0	1	0	0	0	0	1	0	0	0	0	0	1	0	0	0	0
Occludin	OCLN_HUMAN	1	0	0	0	0	0	1	0	0	0	0	0	1	0	0	0	0	1
Pyruvate dehydrogenase E1 component subunit beta mitochondrial	ODPB_HUMAN	0	0	0	0	0	0	1	0	0	0	0	0	0	0	0	0	0	1
Obg-like ATPase 1	OLA1_HUMAN	1	0	1	0	0	0	1	0	0	0	0	0	1	0	0	0	1	1
Olfactomedin-4	OLFM4_HUMAN	1	0	1	0	1	0	1	1	0	1	0	0	1	1	0	0	0	1
5-oxoprolinase	OPLA_HUMAN	0	0	0	0	0	0	1	0	0	0	0	0	0	0	0	0	0	1
Oligoribonuclease mitochondrial	ORN_HUMAN	0	0	0	0	0	0	1	0	0	0	0	0	0	0	0	0	0	1
Mitochondrial ornithine transporter 2	ORNT2_HUMAN	0	0	1	0	0	0	0	0	0	0	0	0	0	1	0	0	0	0
Protein-9	OS9_HUMAN	1	0	1	0	0	0	1	1	0	0	0	0	1	1	0	0	1	1
Oxysterol-binding protein-related protein 3	OSBL3_HUMAN	0	0	1	0	0	0	0	0	0	0	0	0	0	1	0	0	0	0
Oxysterol-binding protein-related protein 6	OSBL6_HUMAN	0	0	1	0	0	0	0	0	0	0	0	0	0	1	0	0	0	0
Oxysterol-binding protein 1	OSBP1_HUMAN	1	0	0	0	0	0	1	0	0	0	0	0	1	0	0	0	0	1
Oncostatin-M-specific receptor subunit beta	OSMR_HUMAN	1	0	0	0	0	0	1	0	0	0	0	0	1	0	0	0	0	1
Dolichyl-diphosphooligosaccharide--protein glycosyltransferase 48 kDa subunit	OST48_HUMAN	0	0	0	0	0	0	1	0	0	0	0	0	0	0	0	0	0	1
Oligosaccharyltransferase complex subunit OSTC	OSTC_HUMAN	0	0	0	0	0	0	1	0	0	0	0	0	0	0	0	0	0	1
Osteoclast-stimulating factor 1	OSTF1_HUMAN	1	0	0	0	0	0	1	0	0	0	0	0	1	0	0	0	0	1
Osteopontin	OSTP_HUMAN	1	1	1	1	1	1	1	1	1	1	1	1	1	1	1	1	1	1
Ubiquitin thioesterase OTUB1	OTUB1_HUMAN	1	0	1	0	0	0	1	1	0	0	0	0	1	1	0	0	0	1
Ovochymase-2	OVCH2_HUMAN	0	0	1	0	0	0	0	0	0	0	0	0	0	1	0	0	0	0
Serine/threonine-protein kinaseR1	OXSR1_HUMAN	1	0	0	0	0	0	0	0	0	0	0	0	1	0	0	0	0	0
Phosphoinositide-3-kinase-interacting protein 1	P3IP1_HUMAN	1	0	0	0	0	0	0	1	0	0	0	0	1	0	0	0	0	0
Platelet-activating factor acetylhydrolase IB subunit beta	PA1B2_HUMAN	1	0	0	0	0	0	0	0	0	0	0	0	1	0	0	0	0	0
Platelet-activating factor acetylhydrolase IB subunit gamma	PA1B3_HUMAN	1	0	0	0	0	0	1	0	0	0	0	0	1	0	0	0	0	1
Group 3 secretory phospholipase A2	PA2G3_HUMAN	1	0	1	0	0	0	0	0	0	0	0	0	1	1	0	0	1	0
Proliferation-associated protein 2G4	PA2G4_HUMAN	1	0	1	0	0	0	1	1	0	0	0	0	1	1	0	0	1	1
Polyadenylate-binding protein 1	PABP1_HUMAN	1	0	1	0	0	0	1	1	0	0	0	0	1	1	0	0	1	1
Polyadenylate-binding protein 3	PABP3_HUMAN	0	0	1	0	0	0	0	0	0	0	0	0	0	0	0	0	1	0
Polyadenylate-binding protein 4	PABP4_HUMAN	1	0	0	0	0	0	0	0	0	0	0	0	1	0	0	0	0	0
Protein kinase C and casein kinase substrate in neurons protein 2	PACN2_HUMAN	1	0	0	0	0	0	1	0	0	0	0	0	1	0	0	0	0	1
Protein kinase C and casein kinase substrate in neurons protein 3	PACN3_HUMAN	1	0	0	0	0	0	1	0	0	0	0	0	1	0	0	0	0	1
Phosphofurin acidic cluster sorting protein 1	PACS1_HUMAN	1	0	0	0	0	0	0	0	0	0	0	0	1	0	0	0	0	0
Protein-arginine deiminase type-2	PADI2_HUMAN	1	0	1	0	1	0	1	0	0	0	0	0	1	1	0	1	0	1
Platelet-activating factor acetylhydrolase 2 cytoplasmic	PAFA2_HUMAN	0	0	0	0	0	0	1	0	0	0	0	0	0	0	0	0	0	1
Group XV phospholipase A2	PAG15_HUMAN	1	0	0	0	0	0	0	0	0	0	0	0	1	0	0	0	0	0
Polyadenylate-binding protein-interacting protein 1	PAIP1_HUMAN	1	0	0	0	0	0	1	0	0	0	0	0	1	0	0	0	0	1
Plasminogen activator inhibitor 1 RNA-binding protein	PAIRB_HUMAN	1	0	0	0	0	0	1	0	0	0	0	0	1	0	0	0	0	1
Serine/threonine-protein kinase PAK 2	PAK2_HUMAN	1	0	0	0	0	0	0	0	0	0	0	0	1	0	0	0	0	0
Serine/threonine-protein kinase PAK 4	PAK4_HUMAN	1	0	0	0	0	0	0	0	0	0	0	0	1	0	0	0	0	0
Paralemmin-3	PALM3_HUMAN	1	0	0	0	0	0	1	0	0	0	0	0	1	0	0	0	0	1
Protein DJ-1	PARK7_HUMAN	1	0	1	0	0	0	1	1	0	0	0	0	1	1	0	0	1	1
Protein PBDC1	PBDC1_HUMAN	0	0	0	0	0	0	1	0	0	0	0	0	0	0	0	0	0	1
Purkinje cell protein 4-like protein 1	PC4L1_HUMAN	1	0	0	0	0	0	0	0	0	0	0	0	1	0	0	0	0	0
Poly(rC)-binding protein 1	PCBP1_HUMAN	1	0	1	0	0	0	1	1	0	0	0	0	1	0	0	0	1	1
Poly(rC)-binding protein 2	PCBP2_HUMAN	1	0	0	0	0	0	0	1	0	0	0	0	1	0	0	0	0	0
Proton coupled folate transporter	PCFT_HUMAN	0	0	0	0	0	1	0	0	0	0	0	0	0	0	0	1	0	0
Protein piccolo	PCLO_HUMAN	1	0	1	0	0	0	0	0	0	0	1	0	0	1	0	0	0	0
Pericentrin	PCNT_HUMAN	0	0	1	0	0	0	0	0	0	0	0	0	0	1	0	0	0	0
Procollagen C-endopeptidase enhancer 1	PCOC1_HUMAN	1	0	0	0	0	0	0	0	0	0	0	0	1	0	0	0	0	0
Procollagen C-endopeptidase enhancer 2	PCOC2_HUMAN	0	0	0	0	0	0	1	0	0	0	0	0	0	0	0	0	0	1
Lysosomal Pro-X carboxypeptidase	PCP_HUMAN	1	0	0	0	0	0	0	0	0	0	0	0	1	0	0	0	0	0
Proprotein convertase subtilisin/kexin type 5	PCSK5_HUMAN	0	0	0	0	0	0	1	0	0	0	0	0	0	0	0	0	0	1
Proprotein convertase subtilisin/kexin type 6	PCSK6_HUMAN	1	0	0	0	0	0	0	1	0	0	0	0	1	0	0	0	0	0
PCTP-like protein	PCTL_HUMAN	0	0	0	0	0	0	1	0	0	0	0	0	0	0	0	0	0	1
Ethanolamine-phosphate cytidylyltransferase	PCY2_HUMAN	1	0	0	0	0	0	1	0	0	0	0	0	1	0	0	0	0	1
Prenylcysteine oxidase 1	PCYOX_HUMAN	0	0	0	0	0	0	1	0	0	0	0	0	0	0	0	0	0	1
Programmed cell death protein 10	PDC10_HUMAN	0	0	0	0	0	0	1	0	0	0	0	0	0	0	0	0	0	1
Programmed cell death 6-interacting protein	PDC6I_HUMAN	1	0	1	0	1	0	1	1	1	0	0	0	1	1	0	0	1	1
Programmed cell death protein 4	PDCD4_HUMAN	1	0	0	0	0	0	1	0	0	0	0	0	1	0	0	0	0	1
Programmed cell death protein 5	PDCD5_HUMAN	1	0	0	0	0	0	0	0	0	0	0	0	1	0	0	0	0	0
Programmed cell death protein 6	PDCD6_HUMAN	0	0	1	0	0	0	1	0	0	0	0	0	0	1	0	0	0	1
Platelet-derived growth factor C	PDGFC_HUMAN	1	0	1	0	0	0	0	1	0	0	0	0	0	0	0	0	1	0
Protein disulfide-isomerase	PDIA1_HUMAN	1	0	1	1	1	1	1	1	1	1	1	1	1	1	0	1	1	1
Protein disulfide-isomerase A3	PDIA3_HUMAN	1	0	1	0	1	0	1	1	0	1	0	0	1	1	0	0	1	1
Protein disulfide-isomerase A4	PDIA4_HUMAN	1	0	0	0	0	0	1	1	0	0	1	0	1	0	0	0	0	1
Protein disulfide-isomerase A6	PDIA6_HUMAN	1	0	1	0	1	0	1	1	0	1	0	0	1	0	0	0	1	1
PDZ and LIM domain protein 5	PDLI5_HUMAN	1	0	0	0	0	0	0	1	0	0	0	0	1	0	0	0	0	0
Pyridoxal-dependent decarboxylase domain-containing protein 1	PDXD1_HUMAN	0	0	0	0	0	0	1	0	0	0	0	0	0	0	0	0	0	1
Pyridoxal kinase	PDXK_HUMAN	1	0	1	0	0	0	1	1	1	0	0	0	1	1	0	0	0	1
Podocalyxin-like protein 2	PDXL2_HUMAN	1	0	0	0	0	0	0	1	0	0	0	0	1	0	0	0	0	0
PDZK1-interacting protein 1	PDZ1I_HUMAN	1	0	0	0	1	0	1	1	1	0	0	0	1	0	0	0	0	1
Astrocytic phosphoprotein PEA-15	PEA15_HUMAN	1	0	0	0	0	0	0	0	0	0	0	0	1	0	0	0	0	0
Phosphatidylethanolamine-binding protein 1	PEBP1_HUMAN	1	0	1	0	1	0	1	1	1	0	1	0	1	1	0	0	1	1
Phosphatidylethanolamine-binding protein 4	PEBP4_HUMAN	1	0	1	0	0	0	0	0	0	0	0	0	1	1	0	0	0	0
Pigment epithelium-derived factor	PEDF_HUMAN	1	0	1	0	1	0	1	1	1	0	0	0	1	1	0	0	1	1
Xaa-Pro dipeptidase	PEPD_HUMAN	1	0	0	0	0	0	0	0	0	0	0	0	1	0	0	0	0	0
Periplakin	PEPL_HUMAN	1	0	0	0	0	0	0	0	0	0	0	0	1	0	0	0	0	0
Lactoperoxidase	PERL_HUMAN	1	0	1	0	1	0	1	1	1	1	0	0	1	1	0	0	0	1
Myeloperoxidase	PERM_HUMAN	0	0	1	0	0	0	0	0	0	0	0	0	0	1	1	0	0	0
Prostaglandin F2-alpha receptor	PF2R_HUMAN	0	0	1	0	0	0	0	0	0	0	0	0	0	1	0	0	0	0
Prefoldin subunit 2	PFD2_HUMAN	1	0	0	0	0	0	0	0	0	0	0	0	1	0	0	0	0	0
Prefoldin subunit 3	PFD3_HUMAN	1	0	0	0	0	0	0	0	0	0	0	0	1	0	0	0	0	0
Prefoldin subunit 4	PFD4_HUMAN	0	0	1	0	0	0	0	0	0	0	0	0	0	0	0	0	1	0
Prefoldin subunit 5	PFD5_HUMAN	1	0	0	0	0	0	0	0	0	0	0	0	1	0	0	0	0	0
Prefoldin subunit 6	PFD6_HUMAN	1	0	0	0	0	0	0	0	0	0	0	0	1	0	0	0	0	0
6-phosphofructokinase muscle type	PFKAM_HUMAN	0	0	1	0	0	0	0	0	0	0	0	0	0	1	0	0	0	0
Phosphoglycerate mutase 1	PGAM1_HUMAN	1	0	1	0	1	0	1	1	1	0	0	0	1	1	0	0	0	1
Basement membrane-specific heparan sulfate proteoglycan core protein	PGBM_HUMAN	1	0	1	0	0	0	0	1	0	0	0	0	1	0	1	0	0	0
Plasma glutamate carboxypeptidase	PGCP_HUMAN	1	0	1	0	0	0	0	0	0	0	0	0	1	1	0	0	0	0
Phosphoglycerate kinase 1	PGK1_HUMAN	1	0	1	0	1	1	1	1	1	1	0	0	1	1	0	1	1	1
Phosphoglycerate kinase testis specific	PGK2_HUMAN	1	0	0	0	0	0	0	0	0	0	0	0	0	0	0	1	0	0
Phosphoglucomutase-1	PGM1_HUMAN	1	0	1	0	1	0	1	1	1	1	0	0	1	1	0	0	1	1
Phosphoglucomutase-2	PGM2_HUMAN	1	0	0	0	0	0	1	1	0	0	0	0	1	0	0	0	0	1
Phosphoglycolate phosphatase	PGP_HUMAN	1	0	1	0	0	0	1	1	0	0	0	0	0	0	0	0	1	1
Membrane-associated progesterone receptor component 1	PGRC1_HUMAN	1	0	0	0	0	0	1	0	0	0	0	0	1	0	0	0	0	1
Membrane-associated progesterone receptor component 2	PGRC2_HUMAN	0	0	0	0	0	0	1	0	0	0	0	0	0	0	0	0	0	1
N-acetylmuramoyl-L-alanine amidase	PGRP2_HUMAN	1	0	1	0	0	0	1	1	0	0	0	0	1	1	0	0	1	1
Geranylgeranyl transferase type-2 subunit alpha	PGTA_HUMAN	0	0	1	0	0	0	1	0	0	0	0	0	0	1	0	0	0	1
Geranylgeranyl transferase type-2 subunit beta	PGTB2_HUMAN	0	0	0	0	0	0	1	0	0	0	0	0	0	0	0	0	0	1
Prohibitin	PHB_HUMAN	0	0	0	0	0	0	1	0	0	0	0	0	0	0	0	0	0	1
Prohibitin-2	PHB2_HUMAN	0	0	0	0	0	0	1	0	0	0	0	0	0	0	0	0	0	1
14 kDa phosphohistidine phosphatase	PHP14_HUMAN	1	0	0	0	0	0	1	0	0	0	0	0	1	0	0	0	0	1
Pterin-4-alpha-carbinolamine dehydratase	PHS_HUMAN	1	0	0	0	0	0	1	1	0	0	0	0	1	0	0	0	0	1
Putative homeodomain transcription factor 1	PHTF1_HUMAN	1	0	0	0	0	0	0	1	0	0	0	0	0	0	0	0	0	0
Phytanoyl-CoA dioxygenase domain-containing protein 1	PHYD1_HUMAN	0	0	0	0	0	0	1	0	0	0	0	0	0	0	0	0	0	1
Peptidase inhibitor 15	PI15_HUMAN	1	0	0	0	0	0	0	1	0	0	0	0	0	0	0	0	0	0
Phosphatidylinositol-5-phosphate 4-kinase type-2 gamma	PI42C_HUMAN	1	0	0	0	0	0	1	0	0	0	0	0	1	0	0	0	0	1
Phosphatidylinositol 4-kinase alpha	PI4KA_HUMAN	1	0	0	0	0	0	1	0	0	0	0	0	1	0	0	0	0	1
Progesterone-induced-blocking factor 1	PIBF1_HUMAN	0	0	1	0	0	0	0	0	0	0	0	0	0	1	0	0	0	0
Protein FAM38A	PIEZ1_HUMAN	0	0	0	0	0	1	0	0	0	0	0	0	0	0	0	1	0	0
Polymeric immunoglobulin receptor	PIGR_HUMAN	1	1	1	1	1	1	1	1	1	1	1	1	1	1	1	1	1	1
Protein-L-isoaspartate(D-aspartate) O-methyltransferase	PIMT_HUMAN	1	0	1	0	0	0	1	1	0	0	0	0	1	1	0	0	0	1
Prolactin-inducible protein	PIP_HUMAN	1	0	1	1	1	0	1	1	1	1	1	1	1	1	1	0	1	1
Phosphatidylinositol transfer protein alpha isoform	PIPNA_HUMAN	1	0	0	0	0	0	1	1	0	0	0	0	1	0	0	0	0	1
Phosphatidylinositol transfer protein beta isoform	PIPNB_HUMAN	1	0	0	0	0	0	1	1	0	0	0	0	1	0	0	0	0	1
Pirin	PIR_HUMAN	1	0	0	0	0	0	1	0	0	0	0	0	1	0	0	0	0	1
PITH domain-containing protein 1	PITH1_HUMAN	1	0	0	0	0	0	1	0	0	0	0	0	1	0	0	0	0	1
Junction plakoglobin	PLAK_HUMAN	1	0	0	0	0	0	1	1	0	0	0	0	0	0	0	0	0	1
Phospholipase A-2-activating protein	PLAP_HUMAN	1	0	0	0	0	0	0	0	0	0	0	0	1	0	0	0	0	0
Putative phospholipase B-like 2	PLBL2_HUMAN	1	0	0	0	0	0	0	0	0	0	0	0	1	0	0	0	0	0
1-acyl-sn-glycerol-3-phosphate acyltransferase alpha	PLCA_HUMAN	0	0	0	0	0	0	1	0	0	0	0	0	0	0	0	0	0	1
1-phosphatidylinositol-45-bisphosphate phosphodiesterase gamma-2	PLCG2_HUMAN	1	0	0	0	0	0	0	0	0	0	0	0	1	0	0	0	0	0
1-phosphatidylinositol-45-bisphosphate phosphodiesterase eta-1	PLCH1_HUMAN	1	0	0	0	0	0	0	1	0	0	0	0	0	0	0	0	0	0
Plectin-1	PLEC_HUMAN	1	0	1	0	0	0	1	0	0	0	0	0	1	1	0	0	0	1
Perilipin-2	PLIN2_HUMAN	1	1	1	1	1	1	1	1	1	1	1	1	1	1	0	1	1	1
Perilipin-3	PLIN3_HUMAN	1	0	1	1	1	1	1	1	1	1	1	1	1	1	0	1	1	1
Plasmolipin	PLLP_HUMAN	0	0	0	0	0	0	1	0	0	0	0	0	0	0	0	0	0	1
Plasminogen	PLMN_HUMAN	1	0	1	0	1	1	1	1	0	0	0	0	1	1	1	1	1	1
Procollagen-lysine2-oxoglutarate 5-dioxygenase 1	PLOD1_HUMAN	1	0	1	0	0	0	1	1	1	0	0	0	1	1	0	0	1	1
Procollagen-lysine2-oxoglutarate 5-dioxygenase 2	PLOD2_HUMAN	1	0	0	0	0	0	0	0	0	0	0	0	1	0	0	0	0	0
Procollagen-lysine2-oxoglutarate 5-dioxygenase 3	PLOD3_HUMAN	1	0	0	0	0	0	0	1	0	0	0	0	1	0	0	0	0	0
Proteolipid protein 2	PLP2_HUMAN	0	0	0	0	0	0	1	0	0	0	0	0	0	0	0	0	0	1
Patatin-like phospholipase domain-containing protein 2	PLPL2_HUMAN	0	0	0	0	0	0	1	0	0	0	0	0	0	0	0	0	0	1
Neuropathy target esterase	PLPL6_HUMAN	0	0	0	0	0	0	1	0	0	0	0	0	0	0	0	0	0	1
Plastin-1	PLSI_HUMAN	1	0	0	0	0	0	1	0	0	0	0	0	1	0	0	0	0	1
Plastin-2	PLSL_HUMAN	1	0	1	0	0	0	1	1	0	0	0	0	1	0	1	0	1	1
Plastin-3	PLST_HUMAN	0	0	1	0	0	0	0	0	0	0	0	0	0	1	0	0	0	0
Phospholipid transfer protein	PLTP_HUMAN	1	0	1	0	0	0	1	1	0	0	0	0	1	0	1	0	1	1
Polyamine-modulated factor 1-binding protein 1	PMFBP_HUMAN	0	0	1	0	0	0	0	0	0	0	0	0	0	1	0	0	0	0
Phosphomannomutase 2	PMM2_HUMAN	1	0	0	0	0	0	1	0	0	0	0	0	1	0	0	0	0	1
Nicotinate phosphoribosyltransferase	PNCB_HUMAN	1	0	0	0	0	0	1	0	0	0	0	0	1	0	0	0	0	1
Purine nucleoside phosphorylase	PNPH_HUMAN	1	0	1	0	0	0	1	1	0	0	0	0	1	1	0	0	1	1
Podocalyxin	PODXL_HUMAN	1	0	1	0	1	0	1	1	1	0	0	0	1	1	1	1	0	1
Serum paraoxonase/arylesterase 1	PON1_HUMAN	1	0	1	0	0	0	1	1	0	0	0	0	1	1	0	0	0	1
Periostin	POSTN_HUMAN	1	0	0	0	0	0	0	0	0	0	0	0	1	0	0	0	0	0
POTE ankyrin domain family member E	POTEE_HUMAN	1	0	1	0	0	0	0	0	1	0	0	0	0	1	0	0	0	0
Serine/threonine-protein phosphatase PP1-alpha catalytic subunit	PP1A_HUMAN	0	0	1	0	0	0	0	0	0	0	0	0	0	1	0	0	0	0
Serine/threonine-protein phosphatase PP1-beta catalytic subunit	PP1B_HUMAN	1	0	0	0	0	0	1	1	0	0	0	0	1	0	0	0	0	1
Protein phosphatase 1 regulatory subunit 7	PP1R7_HUMAN	1	0	1	0	0	0	1	1	0	0	0	0	1	1	0	0	0	1
Serine/threonine-protein phosphatase 2A catalytic subunit alpha isoform	PP2AA_HUMAN	1	0	0	0	0	0	1	1	0	0	0	0	1	0	0	0	0	1
Cluster of Serine/threonine-protein phosphatase 2B catalytic subunit alpha isoform	PP2BA_HUMAN	0	0	0	0	0	0	1	0	0	0	0	0	0	0	0	0	0	1
Serine/threonine-protein phosphatase 2B catalytic subunit beta isoform	PP2BB_HUMAN	1	0	0	0	0	0	0	0	0	0	0	0	1	0	0	0	0	0
Low molecular weight phosphotyrosine protein phosphatase	PPAC_HUMAN	1	0	0	0	0	0	1	0	0	0	0	0	1	0	0	0	0	1
Prolyl endopeptidase	PPCE_HUMAN	1	0	0	0	0	0	0	0	0	0	0	0	1	0	0	0	0	0
Phosphopantothenate--cysteine ligase	PPCS_HUMAN	1	0	0	0	0	0	1	1	0	0	0	0	1	0	0	0	0	1
Lysosomal protective protein	PPGB_HUMAN	1	0	0	0	0	0	0	0	0	0	0	0	1	0	0	0	0	0
Peptidyl-prolyl cis-trans isomerase A	PPIA_HUMAN	1	0	1	1	1	1	1	1	1	1	1	1	1	1	1	1	1	1
Peptidyl-prolyl cis-trans isomerase B	PPIB_HUMAN	1	0	1	0	1	0	1	1	1	0	1	0	1	1	0	0	1	1
Peptidyl-prolyl cis-trans isomerase C	PPIC_HUMAN	1	0	1	0	1	0	1	1	1	0	0	0	1	1	0	0	1	1
Protein phosphatase 1A	PPM1A_HUMAN	1	0	0	0	0	0	1	0	0	0	0	0	1	0	0	0	0	1
Serine/threonine-protein phosphatase 5	PPP5_HUMAN	1	0	0	0	0	0	0	0	0	0	0	0	1	0	0	0	0	0
Palmitoyl-protein thioesterase 1	PPT1_HUMAN	1	0	0	0	0	0	1	1	0	0	0	0	1	0	0	0	0	1
PRA1 family protein 3	PRAF3_HUMAN	0	0	0	0	0	0	1	0	0	0	0	0	0	0	0	0	0	1
Periaxin	PRAX_HUMAN	1	0	0	0	0	0	0	1	0	0	0	0	0	0	0	0	0	0
Large proline-rich protein BAT2	PRC2A_HUMAN	0	0	1	0	0	0	0	0	0	0	0	0	0	1	0	0	0	0
Protein PRRC2C	PRC2C_HUMAN	0	0	0	0	0	0	1	0	0	0	0	0	0	0	0	0	0	1
Phosphoribosyltransferase domain-containing protein 1	PRDC1_HUMAN	0	0	1	0	0	0	0	0	0	0	0	0	0	1	0	0	0	0
PR domain zinc finger protein 2	PRDM2_HUMAN	0	0	0	0	0	0	1	0	0	0	0	0	0	0	0	0	0	1
Peroxiredoxin-1	PRDX1_HUMAN	1	0	1	0	0	0	1	1	0	0	0	0	1	1	0	0	1	1
Peroxiredoxin-2	PRDX2_HUMAN	1	0	1	0	1	0	1	1	1	0	0	0	1	1	0	0	1	1
Thioredoxin-dependent peroxide reductase mitochondrial	PRDX3_HUMAN	1	0	0	0	0	0	1	1	0	0	0	0	0	0	0	0	0	1
Peroxiredoxin-4	PRDX4_HUMAN	1	0	0	0	0	0	1	1	0	0	0	0	1	0	0	0	0	1
Peroxiredoxin-5 mitochondrial	PRDX5_HUMAN	1	0	1	0	0	0	1	1	1	0	0	0	1	1	0	0	0	1
Peroxiredoxin-6	PRDX6_HUMAN	1	0	1	0	1	0	1	1	1	1	0	0	1	1	0	0	1	1
Presequence Protease	PREP_HUMAN	0	0	0	0	0	0	0	0	0	0	0	0	0	0	0	1	0	0
Phosphatidylinositol 345-trisphosphate-dependent Rac exchanger 1 protein	PREX1_HUMAN	1	0	0	0	0	0	0	1	0	0	0	0	0	0	0	0	0	0
Major prion protein	PRIO_HUMAN	1	0	0	0	0	0	1	0	0	0	0	0	1	0	0	0	0	1
DNA-dependent protein kinase catalytic subunit	PRKDC_HUMAN	0	0	1	0	0	0	0	0	0	0	0	0	0	1	0	0	0	0
Interferon-inducible double stranded RNA-dependent protein kinase activator A	PRKRA_HUMAN	0	0	0	0	0	0	1	0	0	0	0	0	0	0	0	0	0	1
Prolactin	PRL_HUMAN	1	0	0	0	0	0	0	0	0	0	0	0	1	0	0	0	0	0
Vitamin K-dependent protein C	PROC_HUMAN	1	0	0	0	0	0	0	1	0	0	0	0	1	0	0	0	0	0
Profilin-1	PROF1_HUMAN	1	0	1	0	1	0	1	1	1	1	0	0	1	1	0	0	0	1
Prominin-1	PROM1_HUMAN	1	0	1	0	1	0	0	1	1	0	0	0	1	0	1	0	0	0
Prominin-2	PROM2_HUMAN	1	0	0	0	0	0	0	1	0	0	0	0	1	0	0	0	0	0
Vitamin K-dependent protein S	PROS_HUMAN	1	0	0	0	0	0	0	1	0	0	0	0	1	0	0	0	0	0
Proline synthase co-transcribed bacterial homolog protein	PROSC_HUMAN	1	0	1	0	0	0	1	0	0	0	0	0	1	0	0	0	1	1
Prospero homeobox protein 1	PROX1_HUMAN	1	0	0	0	0	0	0	1	0	0	0	0	0	0	0	0	0	0
Ribose-phosphate pyrophosphokinase 2	PRPS2_HUMAN	1	0	1	0	0	0	1	1	0	0	0	0	1	1	0	0	1	1
Protein PRRC1	PRRC1_HUMAN	1	0	0	0	0	0	1	0	0	0	0	0	1	0	0	0	0	1
26S protease regulatory subunit 10B	PRS10_HUMAN	1	0	0	0	0	0	1	0	0	0	0	0	1	0	0	0	0	1
Serine protease 23	PRS23_HUMAN	1	0	0	0	0	0	0	0	0	0	0	0	1	0	0	0	0	0
26S protease regulatory subunit 4	PRS4_HUMAN	0	0	1	0	0	0	1	0	0	0	0	0	0	1	0	0	0	1
26S protease regulatory subunit 6A	PRS6A_HUMAN	1	0	0	0	0	0	1	0	0	0	0	0	1	0	0	0	0	1
26S protease regulatory subunit 6B	PRS6B_HUMAN	1	0	0	0	0	0	1	0	0	0	0	0	1	0	0	0	0	1
26S protease regulatory subunit 7	PRS7_HUMAN	1	0	0	0	0	0	1	0	0	0	0	0	1	0	0	0	0	1
26S protease regulatory subunit 8	PRS8_HUMAN	1	0	0	0	0	0	1	0	0	0	0	0	1	0	0	0	0	1
Prostasin	PRSS8_HUMAN	1	0	1	0	1	1	1	1	1	0	0	0	1	1	1	1	0	1
Myeloblastin	PRTN3_HUMAN	0	0	1	0	0	0	0	0	0	0	0	0	0	0	1	0	0	0
Puromycin-sensitive aminopeptidase	PSA_HUMAN	1	0	1	0	1	0	1	1	1	0	0	0	1	1	0	0	0	1
Proteasome subunit alpha type-1	PSA1_HUMAN	1	0	1	0	0	0	1	1	0	0	0	0	1	1	0	0	0	1
Proteasome subunit alpha type-2	PSA2_HUMAN	1	0	0	0	0	0	1	0	0	0	0	0	1	0	0	0	0	1
Proteasome subunit alpha type-3	PSA3_HUMAN	1	0	1	0	0	0	1	1	0	0	0	0	1	1	0	0	0	1
Proteasome subunit alpha type-4	PSA4_HUMAN	1	0	0	0	0	0	1	1	0	0	0	0	1	0	0	0	0	1
Proteasome subunit alpha type-5	PSA5_HUMAN	1	0	1	0	0	0	1	1	0	0	0	0	1	0	0	0	1	1
Proteasome subunit alpha type-6	PSA6_HUMAN	1	0	1	0	0	0	1	1	0	0	0	0	1	1	0	0	0	1
Proteasome subunit alpha type-7	PSA7_HUMAN	1	0	1	0	0	0	1	1	0	0	0	0	1	0	0	0	1	1
Proteasome subunit beta type-1	PSB1_HUMAN	1	0	1	0	0	0	1	1	0	0	0	0	1	1	0	0	1	1
Proteasome subunit beta type-2	PSB2_HUMAN	1	0	1	0	0	0	1	1	0	0	0	0	1	0	0	0	1	1
Proteasome subunit beta type-3	PSB3_HUMAN	1	0	0	0	0	0	1	1	0	0	0	0	1	0	0	0	0	1
Proteasome subunit beta type-4	PSB4_HUMAN	1	0	0	0	0	0	1	1	0	0	0	0	1	0	0	0	0	1
Proteasome subunit beta type-5	PSB5_HUMAN	1	0	0	0	0	0	1	1	0	0	0	0	1	0	0	0	0	1
Proteasome subunit beta type-6	PSB6_HUMAN	1	0	0	0	0	0	1	1	0	0	0	0	1	0	0	0	0	1
Proteasome subunit beta type-7	PSB7_HUMAN	1	0	0	0	0	0	1	0	0	0	0	0	1	0	0	0	0	1
Proteasome subunit beta type-8	PSB8_HUMAN	1	0	1	0	0	0	1	1	0	0	0	0	1	1	0	0	0	1
Proteasome subunit beta type-9	PSB9_HUMAN	1	0	0	0	0	0	1	0	0	0	0	0	1	0	0	0	0	1
Prostate stem cell antigen	PSCA_HUMAN	1	0	0	0	0	0	0	1	0	0	0	0	0	0	0	0	0	0
26S proteasome non-ATPase regulatory subunit 11	PSD11_HUMAN	1	0	0	0	0	0	1	0	0	0	0	0	1	0	0	0	0	1
26S proteasome non-ATPase regulatory subunit 12	PSD12_HUMAN	1	0	0	0	0	0	1	0	0	0	0	0	1	0	0	0	0	1
26S proteasome non-ATPase regulatory subunit 13	PSD13_HUMAN	1	0	0	0	0	0	1	1	0	0	0	0	1	0	0	0	0	1
26S proteasome non-ATPase regulatory subunit 7	PSD7_HUMAN	1	0	0	0	0	0	1	0	0	0	0	0	1	0	0	0	0	1
26S proteasome non-ATPase regulatory subunit 14	PSDE_HUMAN	1	0	0	0	0	0	1	1	0	0	0	0	1	0	0	0	0	1
26S proteasome non-ATPase regulatory subunit 1	PSMD1_HUMAN	1	0	0	0	0	0	1	0	0	0	0	0	1	0	0	0	0	1
26S proteasome non-ATPase regulatory subunit 2	PSMD2_HUMAN	1	0	0	0	0	0	1	1	0	0	0	0	1	0	0	0	0	1
26S proteasome non-ATPase regulatory subunit 3	PSMD3_HUMAN	1	0	1	0	0	0	1	0	0	0	0	0	1	1	0	0	0	1
26S proteasome non-ATPase regulatory subunit 4	PSMD4_HUMAN	1	0	0	0	0	0	1	0	0	0	0	0	1	0	0	0	0	1
26S proteasome non-ATPase regulatory subunit 5	PSMD5_HUMAN	1	0	0	0	0	0	1	0	0	0	0	0	1	0	0	0	0	1
26S proteasome non-ATPase regulatory subunit 6	PSMD6_HUMAN	1	0	1	0	0	0	1	0	0	0	0	0	1	1	0	0	0	1
26S proteasome non-ATPase regulatory subunit 8	PSMD8_HUMAN	1	0	1	0	0	0	0	0	0	0	0	0	1	1	0	0	0	0
Proteasome activator complex subunit 1	PSME1_HUMAN	1	0	1	0	0	0	1	1	0	0	0	0	1	1	0	0	1	1
Proteasome activator complex subunit 2	PSME2_HUMAN	1	0	1	0	1	0	1	1	1	0	0	0	1	1	0	0	0	1
Proteasome inhibitor PI31 subunit	PSMF1_HUMAN	1	0	0	0	0	0	1	0	0	0	0	0	1	0	0	0	0	1
Proteasome assembly chaperone 1	PSMG1_HUMAN	1	0	0	0	0	0	0	0	0	0	0	0	1	0	0	0	0	0
Polypyrimidine tract-binding protein 1	PTBP1_HUMAN	0	0	0	0	0	0	1	0	0	0	0	0	0	0	0	0	0	1
Phosphotriesterase-related protein	PTER_HUMAN	0	0	0	0	0	0	1	0	0	0	0	0	0	0	0	0	0	1
Prostaglandin reductase 1	PTGR1_HUMAN	1	0	1	0	0	0	1	1	1	0	0	0	1	1	0	0	1	1
Prostaglandin reductase 2	PTGR2_HUMAN	0	0	0	0	0	0	1	0	0	0	0	0	0	0	0	0	0	1
Parathyroid hormone-related protein	PTHR_HUMAN	1	0	1	0	1	0	1	1	1	1	0	0	1	1	0	0	1	1
Prothymosin alpha	PTMA_HUMAN	1	0	0	0	0	0	0	0	0	0	0	0	1	0	0	0	0	0
Tyrosine-protein phosphatase non-receptor type 13	PTN13_HUMAN	1	0	0	0	0	0	0	1	0	0	0	0	0	0	0	0	0	0
Serine/threonine-protein phosphatase 2A activator	PTPA_HUMAN	1	0	0	0	0	0	1	1	0	0	0	0	1	0	0	0	0	1
Receptor-type tyrosine-protein phosphatase delta	PTPRD_HUMAN	0	0	0	0	0	0	1	0	0	0	0	0	0	0	0	0	0	1
Receptor-type tyrosine-protein phosphatase F	PTPRF_HUMAN	1	0	1	0	0	0	1	1	0	0	0	0	1	0	0	0	1	1
Receptor-type tyrosine-protein phosphatase eta	PTPRJ_HUMAN	1	0	0	0	0	0	1	1	0	0	0	0	1	0	0	0	0	1
Receptor-type tyrosine-protein phosphatase kappa	PTPRK_HUMAN	1	0	0	0	0	0	0	1	0	0	0	0	1	0	0	0	0	0
Putative peptidyl-tRNA hydrolase PTRHD1	PTRD1_HUMAN	1	0	1	0	0	0	0	0	0	0	0	0	1	1	0	0	0	0
Trifunctional purine biosynthetic protein adenosine-3	PUR2_HUMAN	1	0	0	0	0	0	0	0	0	0	0	0	1	0	0	0	0	0
Multifunctional protein ADE2	PUR6_HUMAN	1	0	0	0	0	0	1	1	0	0	0	0	1	0	0	0	0	1
Adenylosuccinate lyase	PUR8_HUMAN	0	0	0	0	0	0	1	0	0	0	0	0	0	0	0	0	0	1
Bifunctional purine biosynthesis protein PURH	PUR9_HUMAN	1	0	1	0	0	0	1	0	0	0	0	0	1	0	0	0	1	1
Transcriptional activator protein Pur-alpha	PURA_HUMAN	1	0	0	0	0	0	1	0	0	0	0	0	1	0	0	0	0	1
Adenylosuccinate synthetase isozyme 2	PURA2_HUMAN	1	0	1	0	0	0	1	0	0	0	0	0	1	1	0	0	0	1
Pseudouridylate synthase 7 homolog	PUS7_HUMAN	0	0	1	0	0	0	0	0	0	0	0	0	0	1	0	0	0	0
Poliovirus receptor-related protein 4	PVRL4_HUMAN	1	0	0	0	0	0	0	1	0	0	0	0	0	0	0	0	0	0
Peroxisomal membrane protein 11B	PX11B_HUMAN	0	0	0	0	0	0	1	0	0	0	0	0	0	0	0	0	0	1
Peroxidasin homolog	PXDN_HUMAN	1	0	0	0	0	0	1	0	0	0	0	0	1	0	0	0	0	1
Glycogen phosphorylase brain form	PYGB_HUMAN	1	0	1	0	0	0	1	0	0	0	0	0	1	1	0	0	0	1
Glycogen phosphorylase liver form	PYGL_HUMAN	1	0	1	0	0	0	0	0	1	0	0	0	1	1	0	0	0	0
CAD protein	PYR1_HUMAN	0	0	0	0	0	0	1	0	0	0	0	0	0	0	0	0	0	1
Pregnancy zone protein	PZP_HUMAN	1	0	0	0	0	0	0	1	0	0	0	0	1	0	0	0	0	0
Carcinoembryonic antigen-related cell adhesion molecule 1 (Biliary glycoprotein) CD66a	Q3KRG8_HUMAN	0	1	0	0	1	1	0	0	1	0	0	0	0	0	0	1	0	0
Immunoglobulin lambda	Q6GMX3_HUMAN	1	0	0	0	1	0	0	0	1	0	0	0	0	0	0	0	0	0
BNF1	Q7Z5J3_HUMAN	0	0	1	0	0	0	0	0	0	0	0	0	0	0	1	0	0	0
GW112	Q9H1L6_HUMAN	0	0	1	0	0	0	0	0	0	0	0	0	0	0	1	0	0	0
Mucin 4/Y	Q9NY76_HUMAN	0	0	1	0	0	0	0	0	0	0	0	0	0	0	1	0	0	0
GPI-anchored metastasis- associated protein homolog	Q9UJ74_HUMAN	0	0	1	0	0	0	0	0	0	0	0	0	0	0	1	0	0	0
Cytochrome b-c1 complex subunit 2 mitochondrial	QCR2_HUMAN	0	0	0	0	0	0	1	0	0	0	0	0	0	0	0	0	0	1
Quinone oxidoreductase	QOR_HUMAN	1	0	1	0	0	0	1	1	0	0	0	0	1	0	0	0	1	1
Quinone oxidoreductase PIG3	QORX_HUMAN	1	0	0	0	0	0	1	1	0	0	0	0	1	0	0	0	0	1
Glutaminyl-peptide cyclotransferase	QPCT_HUMAN	1	0	0	0	0	0	0	1	0	0	0	0	1	0	0	0	0	0
Glutaminyl-peptide cyclotransferase-like protein	QPCTL_HUMAN	0	0	0	0	0	0	1	0	0	0	0	0	0	0	0	0	0	1
Glutamine-rich protein 2	QRIC2_HUMAN	0	0	1	0	0	0	0	0	0	0	0	0	0	1	0	0	0	0
Sulfhydryl oxidase 1	QSOX1_HUMAN	1	1	1	1	1	0	1	1	1	1	1	1	1	1	1	1	1	1
Ras-related protein Rab-10	RAB10_HUMAN	1	1	1	0	1	1	0	1	1	1	0	0	1	1	0	1	0	0
Ras-related protein Rab-13	RAB13_HUMAN	0	0	0	0	0	0	1	0	0	0	0	0	0	0	0	0	0	1
Ras-related protein Rab-14	RAB14_HUMAN	1	0	0	0	0	0	0	1	0	0	0	0	1	0	0	0	0	0
Ras-related protein Rab-18	RAB18_HUMAN	1	1	1	1	1	0	1	1	1	1	0	1	1	1	0	1	0	1
Ras-related protein Rab-1A	RAB1A_HUMAN	1	0	1	0	1	1	1	1	1	1	0	0	1	1	0	1	1	1
Ras-related protein Rab-1B	RAB1B_HUMAN	1	0	1	0	1	1	0	0	1	0	0	0	1	0	0	1	1	0
Ras-related protein Rab-21	RAB21_HUMAN	1	0	1	0	0	0	1	1	0	0	0	0	1	0	0	0	1	1
Ras-related protein Rab-25	RAB25_HUMAN	1	0	0	0	0	1	1	0	0	0	0	0	1	0	0	1	0	1
Ras-related protein Rab-2A	RAB2A_HUMAN	1	0	1	0	1	1	1	1	0	1	0	0	1	1	0	1	0	1
Ras-related protein Rab-2B	RAB2B_HUMAN	1	0	0	0	0	0	0	0	0	0	0	0	0	0	0	1	0	0
Ras-related protein Rab-35	RAB35_HUMAN	1	0	0	0	1	1	0	0	0	0	0	0	1	0	0	1	0	0
Ras-related protein Rab-3D	RAB3D_HUMAN	1	0	0	0	1	0	0	1	0	0	0	0	1	0	0	1	0	0
Ras-related protein Rab-5A	RAB5A_HUMAN	1	0	0	0	1	1	1	1	1	0	0	0	1	0	0	1	0	1
Ras-related protein Rab-5B	RAB5B_HUMAN	1	0	0	0	1	0	1	1	1	0	0	0	1	0	0	0	0	1
Ras-related protein Rab-5C	RAB5C_HUMAN	1	0	1	0	1	1	1	1	0	1	0	0	1	1	0	1	1	1
Ras-related protein Rab-6A	RAB6A_HUMAN	1	0	0	0	0	0	1	0	0	0	0	0	1	0	0	0	0	1
Ras-related protein Rab-6C	RAB6C_HUMAN	1	0	0	0	0	0	1	1	0	0	0	0	0	0	0	0	0	1
Ras-related protein Rab-7a	RAB7A_HUMAN	1	1	1	0	1	1	1	1	1	0	0	0	1	1	0	1	1	1
Ras-related protein Rab-7L1	RAB7L_HUMAN	0	0	0	0	0	0	1	0	0	0	0	0	0	0	0	0	0	1
Ras-related protein Rab-8A	RAB8A_HUMAN	1	0	1	0	1	0	0	1	0	0	0	0	1	0	0	1	1	0
Cluster of Ras-related protein Rab-9A	RAB9A_HUMAN	0	0	0	0	0	0	1	0	0	0	0	0	0	0	0	0	0	1
Rab-like protein 3	RABL3_HUMAN	0	0	0	0	0	0	1	0	0	0	0	0	0	0	0	0	0	1
Cellular retinoic acid-binding protein 1	RABP1_HUMAN	1	0	0	0	1	1	0	1	0	0	0	0	1	0	0	1	0	0
Cellular retinoic acid-binding protein 2	RABP2_HUMAN	1	0	1	0	1	1	1	1	1	0	0	0	1	1	0	1	0	1
Ras-related C3 botulinum toxin substrate 1	RAC1_HUMAN	1	0	1	0	1	1	0	1	1	1	0	0	1	1	0	1	1	0
Ras-related C3 botulinum toxin substrate 3	RAC3_HUMAN	0	0	1	0	0	0	0	0	0	0	0	0	0	1	0	0	0	0
DNA repair protein RAD50	RAD50_HUMAN	1	0	0	0	0	0	0	0	0	0	0	0	1	0	0	0	0	0
DNA repair and recombination protein RAD54-like	RAD54_HUMAN	0	0	1	0	0	0	0	0	0	0	0	0	0	1	0	0	0	0
Radixin	RADI_HUMAN	1	0	1	0	1	0	1	0	1	0	0	0	1	1	0	0	1	1
Rab proteins geranylgeranyltransferase component A 1	RAE1_HUMAN	0	0	1	0	0	0	0	0	0	0	0	0	0	1	0	0	0	0
Ankycorbin	RAI14_HUMAN	1	0	0	0	0	0	0	1	0	0	0	0	0	0	0	0	0	0
Ras-related protein Ral-A	RALA_HUMAN	1	1	1	0	1	0	1	0	1	0	0	0	0	1	0	1	0	1
Ras-related protein Ral-B	RALB_HUMAN	1	0	1	0	1	1	1	1	1	1	0	0	1	1	0	1	0	1
GTP-binding nuclear protein Ran	RAN_HUMAN	1	0	0	0	0	0	1	1	0	0	0	0	1	0	0	0	0	1
Ran-specific GTPase-activating protein	RANG_HUMAN	1	0	0	0	0	0	0	0	0	0	0	0	1	0	0	0	0	0
Ras-related protein Rap-1A	RAP1A_HUMAN	1	0	1	0	1	1	1	0	0	0	0	0	0	1	0	1	1	1
Ras-related protein Rap-1b	RAP1B_HUMAN	1	0	1	0	1	1	0	1	1	1	0	0	1	1	0	1	0	0
Ras-related protein Rap-2c	RAP2C_HUMAN	1	0	0	0	0	0	1	0	0	0	0	0	1	0	0	0	0	1
Ras association domain-containing protein 2	RASF2_HUMAN	0	0	0	0	0	0	1	0	0	0	0	0	0	0	0	0	0	1
GTPase KRas	RASK_HUMAN	1	0	0	0	0	0	1	0	0	0	0	0	1	0	0	0	0	1
Ras-related protein M-Ras	RASM_HUMAN	0	0	0	0	0	0	1	0	0	0	0	0	0	0	0	0	0	1
GTPase NRas	RASN_HUMAN	0	0	0	0	0	0	1	0	0	0	0	0	0	0	0	0	0	1
Ras-related protein Rab-11A	RB11A_HUMAN	1	0	0	0	1	0	1	0	1	0	0	0	0	0	0	0	0	1
Ras-related protein Rab-11B	RB11B_HUMAN	1	0	1	0	0	0	1	1	0	0	0	0	1	0	0	0	1	1
Ras-related protein Rab-22A	RB22A_HUMAN	0	0	0	0	0	0	1	0	0	0	0	0	0	0	0	0	0	1
Ras-related protein Rab-27A	RB27A_HUMAN	0	0	0	0	0	0	1	0	0	0	0	0	0	0	0	0	0	1
Ras-related protein Rab-27B	RB27B_HUMAN	0	0	0	0	0	0	1	0	0	0	0	0	0	0	0	0	0	1
Putative hydrolase RBBP9	RBBP9_HUMAN	1	0	0	0	0	0	1	1	0	0	0	0	0	0	0	0	0	1
RB1-inducible coiled-coil protein 1	RBCC1_HUMAN	1	0	0	0	0	0	0	1	0	0	0	0	0	0	0	0	0	0
Putative RNA-binding protein 15	RBM15_HUMAN	0	0	1	0	0	0	0	0	0	0	0	0	0	1	0	0	0	0
Ribokinase	RBSK_HUMAN	1	0	0	0	0	0	0	1	0	0	0	0	0	0	0	0	0	0
Reticulocalbin-1	RCN1_HUMAN	1	0	0	0	0	0	1	1	0	0	0	0	1	0	0	0	0	1
UV excision repair protein RAD23 homolog A	RD23A_HUMAN	1	0	0	0	0	0	0	0	0	0	0	0	1	0	0	0	0	0
UV excision repair protein RAD23 homolog B	RD23B_HUMAN	1	0	1	0	0	0	0	0	0	0	0	0	1	1	0	0	1	0
Retinol dehydrogenase 11	RDH11_HUMAN	0	0	0	0	0	0	1	0	0	0	0	0	0	0	0	0	0	1
Reversion-inducing cysteine-rich protein with Kazal motifs	RECK_HUMAN	1	0	0	0	0	0	0	0	0	0	0	0	1	0	0	0	0	0
Receptor expression-enhancing protein 5	REEP5_HUMAN	1	0	0	0	0	0	1	0	0	0	0	0	1	0	0	0	0	1
Receptor expression-enhancing protein 6	REEP6_HUMAN	0	0	0	0	0	0	1	0	0	0	0	0	0	0	0	0	0	1
Renin receptor	RENR_HUMAN	0	0	0	0	0	0	1	0	0	0	0	0	0	0	0	0	0	1
Regulator of nonsense transcripts 1	RENT1_HUMAN	1	0	0	0	0	0	1	0	0	0	0	0	1	0	0	0	0	1
Regulator of nonsense transcripts 2	RENT2_HUMAN	0	0	1	0	0	0	0	0	0	0	0	0	0	1	0	0	0	0
Protein RER1	RER1_HUMAN	0	0	0	0	0	0	1	0	0	0	0	0	0	0	0	0	0	1
Retinol-binding protein 1	RET1_HUMAN	1	0	0	0	0	0	1	1	0	0	0	0	1	0	0	0	0	1
Retinol-binding protein 4	RET4_HUMAN	1	0	1	0	0	0	1	1	0	0	0	0	1	1	0	0	0	1
Replication factor C subunit 1	RFC1_HUMAN	1	0	0	0	0	0	0	1	0	0	0	0	0	0	0	0	0	0
Rho-guanine nucleotide exchange factor	RGNEF_HUMAN	1	0	0	0	0	0	0	1	0	0	0	0	0	0	0	0	0	0
GTP-binding protein Rheb	RHEB_HUMAN	1	0	0	0	0	0	1	1	0	0	0	0	1	0	0	0	0	1
Rho GTPase-activating protein 1	RHG01_HUMAN	1	0	0	0	0	0	1	0	0	0	0	0	1	0	0	0	0	1
Rho GTPase-activating protein 18	RHG18_HUMAN	1	0	1	0	0	0	1	0	0	0	0	0	1	1	0	0	0	1
Rho GTPase-activating protein 29	RHG29_HUMAN	1	0	0	0	0	0	0	1	0	0	0	0	0	0	0	0	0	0
Transforming protein RhoA	RHOA_HUMAN	1	0	1	0	1	1	1	1	1	1	0	0	1	1	0	1	1	1
Rho-related GTP-binding protein RhoB	RHOB_HUMAN	0	0	1	0	0	0	1	0	0	0	0	0	0	0	0	0	1	1
Rho-related GTP-binding protein RhoC	RHOC_HUMAN	0	0	0	1	1	0	1	0	0	0	1	1	0	0	0	1	0	1
Rho-related GTP-binding protein RhoG	RHOG_HUMAN	1	0	1	0	1	1	0	1	0	0	0	0	0	1	0	1	0	0
Rapamycin-insensitive companion of mTOR	RICTR_HUMAN	0	0	1	0	0	0	0	0	0	0	0	0	0	1	0	0	0	0
Ribonuclease inhibitor	RINI_HUMAN	1	0	1	0	0	0	1	0	0	0	0	0	1	0	0	0	1	1
Retinoid-inducible serine carboxypeptidase	RISC_HUMAN	1	0	1	0	0	0	1	1	1	0	0	0	1	1	0	0	1	1
60S ribosomal protein L10	RL10_HUMAN	0	0	1	0	0	0	1	0	0	0	0	0	0	1	0	0	0	1
60S ribosomal protein L10a	RL10A_HUMAN	1	0	1	0	0	0	1	0	0	0	0	0	1	1	0	0	0	1
60S ribosomal protein L10-like	RL10L_HUMAN	0	0	0	0	0	0	1	0	0	0	0	0	0	0	0	0	0	1
60S ribosomal protein L11	RL11_HUMAN	1	0	0	0	0	0	1	1	0	0	0	0	0	0	0	0	0	1
60S ribosomal protein L12	RL12_HUMAN	1	0	1	0	1	0	1	1	1	0	0	0	0	1	0	0	1	1
60S ribosomal protein L13	RL13_HUMAN	1	0	1	0	0	0	1	1	0	0	0	0	0	1	0	0	0	1
60S ribosomal protein L13a	RL13A_HUMAN	1	0	1	0	0	0	1	1	0	0	0	0	0	1	0	0	0	1
60S ribosomal protein L14	RL14_HUMAN	0	0	1	0	0	0	1	0	0	0	0	0	0	1	0	0	0	1
60S ribosomal protein L15	RL15_HUMAN	1	0	1	0	0	0	1	1	0	0	0	0	0	1	0	0	0	1
60S ribosomal protein L17	RL17_HUMAN	0	0	1	0	0	0	1	0	0	0	0	0	0	1	0	0	0	1
60S ribosomal protein L18	RL18_HUMAN	1	0	0	0	0	0	1	1	0	0	0	0	0	0	0	0	0	1
60S ribosomal protein L18a	RL18A_HUMAN	0	0	0	0	0	0	1	0	0	0	0	0	0	0	0	0	0	1
60S ribosomal protein L19	RL19_HUMAN	1	0	1	0	0	0	1	1	0	0	0	0	0	1	0	0	0	1
60S ribosomal protein L21	RL21_HUMAN	0	0	0	0	0	0	1	0	0	0	0	0	0	0	0	0	0	1
60S ribosomal protein L22	RL22_HUMAN	1	0	0	0	0	0	1	1	0	0	0	0	0	0	0	0	0	1
60S ribosomal protein L23	RL23_HUMAN	1	0	1	0	0	0	1	0	0	0	0	0	1	0	0	0	1	1
60S ribosomal protein L23a	RL23A_HUMAN	1	0	1	0	0	0	1	1	0	0	0	0	0	1	0	0	0	1
60S ribosomal protein L24	RL24_HUMAN	0	0	1	0	0	0	1	0	0	0	0	0	0	1	0	0	1	1
60S ribosomal protein L26	RL26_HUMAN	0	0	1	0	0	0	1	0	0	0	0	0	0	1	0	0	0	1
60S ribosomal protein L26-like 1	RL26L_HUMAN	0	0	0	0	0	0	1	0	0	0	0	0	0	0	0	0	0	1
60S ribosomal protein L27	RL27_HUMAN	0	0	0	0	0	0	1	0	0	0	0	0	0	0	0	0	0	1
60S ribosomal protein L27a	RL27A_HUMAN	0	0	0	0	0	0	1	0	0	0	0	0	0	0	0	0	0	1
60S ribosomal protein L28	RL28_HUMAN	1	0	0	0	0	0	1	1	0	0	0	0	0	0	0	0	0	1
60S ribosomal protein L29	RL29_HUMAN	0	0	0	0	0	0	1	0	0	0	0	0	0	0	0	0	0	1
60S ribosomal protein L3	RL3_HUMAN	1	0	0	0	0	0	1	1	0	0	0	0	1	0	0	0	0	1
60S ribosomal protein L30	RL30_HUMAN	1	0	0	0	0	0	1	1	0	0	0	0	0	0	0	0	0	1
60S ribosomal protein L31	RL31_HUMAN	0	0	1	0	0	0	1	0	0	0	0	0	0	1	0	0	1	1
60S ribosomal protein L32	RL32_HUMAN	1	0	0	0	0	0	1	1	0	0	0	0	0	0	0	0	0	1
60S ribosomal protein L34	RL34_HUMAN	1	0	1	0	0	0	1	1	0	0	0	0	1	1	0	0	0	1
60S ribosomal protein L35	RL35_HUMAN	1	0	0	0	0	0	1	1	0	0	0	0	0	0	0	0	0	1
60S ribosomal protein L35a	RL35A_HUMAN	0	0	0	0	0	0	1	0	0	0	0	0	0	0	0	0	0	1
60S ribosomal protein L36	RL36_HUMAN	1	0	0	0	0	0	1	1	0	0	0	0	0	0	0	0	0	1
60S ribosomal protein L36a-like	RL36L_HUMAN	0	0	0	0	0	0	1	0	0	0	0	0	0	0	0	0	0	1
60S ribosomal protein L37a	RL37A_HUMAN	0	0	0	0	0	0	1	0	0	0	0	0	0	0	0	0	0	1
60S ribosomal protein L38	RL38_HUMAN	0	0	0	0	0	0	1	0	0	0	0	0	0	0	0	0	0	1
60S ribosomal protein L39	RL39_HUMAN	0	0	0	0	0	0	1	0	0	0	0	0	0	0	0	0	0	1
60S ribosomal protein L4	RL4_HUMAN	1	0	0	0	0	0	1	1	0	0	0	0	1	0	0	0	0	1
Ubiquitin-60S ribosomal protein L40	RL40_HUMAN	1	0	1	0	0	0	1	1	0	0	0	0	1	0	0	0	1	1
60S ribosomal protein L5	RL5_HUMAN	0	0	1	0	0	0	1	0	0	0	0	0	0	1	0	0	0	1
60S ribosomal protein L6	RL6_HUMAN	1	0	0	0	0	0	1	1	0	0	0	0	1	0	0	0	0	1
60S ribosomal protein L7	RL7_HUMAN	1	0	1	0	0	0	1	1	0	0	0	0	0	1	0	0	0	1
60S ribosomal protein L7a	RL7A_HUMAN	1	0	1	0	0	0	1	1	0	0	0	0	0	1	0	0	0	1
60S ribosomal protein L8	RL8_HUMAN	0	0	1	0	0	0	1	0	0	0	0	0	0	1	0	0	0	1
60S ribosomal protein L9	RL9_HUMAN	0	0	0	0	0	0	1	0	0	0	0	0	0	0	0	0	0	1
60S acidic ribosomal protein P0	RLA0_HUMAN	1	0	1	0	0	0	1	0	0	0	0	0	1	1	0	0	0	1
60S acidic ribosomal protein P0-like	RLA0L_HUMAN	1	0	1	0	0	0	0	1	0	0	0	0	0	1	0	0	1	0
60S acidic ribosomal protein P1	RLA1_HUMAN	1	0	1	0	0	0	1	0	0	0	1	0	0	1	0	0	1	1
60S acidic ribosomal protein P2	RLA2_HUMAN	1	0	1	0	0	0	0	1	0	0	0	0	1	1	0	0	1	0
39S ribosomal protein L24 mitochondrial	RM24_HUMAN	0	0	0	0	0	0	1	0	0	0	0	0	0	0	0	0	0	1
E3 ubiquitin-protein ligase RNF170	RN170_HUMAN	0	0	0	0	0	0	1	0	0	0	0	0	0	0	0	0	0	1
RING finger protein 213	RN213_HUMAN	0	0	1	0	0	0	0	0	0	0	0	0	0	1	0	0	0	0
Ribonuclease 4	RNAS4_HUMAN	1	0	1	0	1	0	1	1	1	0	0	0	1	1	0	0	1	1
RNA-binding protein with serine-rich domain 1	RNPS1_HUMAN	1	0	0	0	0	0	0	0	0	0	1	0	0	0	0	0	0	0
Ribonuclease T2	RNT2_HUMAN	1	0	1	0	0	0	1	1	0	0	0	0	1	0	1	0	0	1
60 kDa SS-A/Ro ribonucleoprotein	RO60_HUMAN	0	0	0	0	0	0	1	0	0	0	0	0	0	0	0	0	0	1
Tyrosine-protein kinase transmembrane receptor ROR2	ROR2_HUMAN	1	0	0	0	0	0	0	0	0	0	0	0	1	0	0	0	0	0
DNA-directed RNA polymerases I II and III subunit RPABC3	RPAB3_HUMAN	0	0	0	0	0	0	1	0	0	0	0	0	0	0	0	0	0	1
X-linked retinitis pigmentosa GTPase regulator-interacting protein 1	RPGR1_HUMAN	0	0	1	0	0	0	0	0	0	0	0	0	0	1	0	0	0	0
Dolichyl-diphosphooligosaccharide--protein glycosyltransferase subunit 1	RPN1_HUMAN	0	0	0	0	0	0	1	0	0	0	0	0	0	0	0	0	0	1
Dolichyl-diphosphooligosaccharide--protein glycosyltransferase subunit 2	RPN2_HUMAN	0	0	0	0	0	0	1	0	0	0	0	0	0	0	0	0	0	1
[truncated: 558 more rows]

## Sheet: Summary
The comprehensive proteome is a the union of protein lists appearing in the following publications:
Publication Year	First author	Milk Fraction	Title	URL	Location of Proteomic information
2006	Palmer	skim	Human colostrum: Identification of minor proteins in the aqueous phase by proteomics	http://onlinelibrary.wiley.com/doi/10.1002/pmic.200500558/abstract;jsessionid=FD856A26017BDCB1B52D34FD202ACA5C.f03t03	Table 1
2011	Liao	whey	Proteomic Characterization of Human Milk Whey Proteins during a Twelve-Month Lactation Period	http://pubs.acs.org/doi/abs/10.1021/pr101028k	Table 1
2011	Liao	casein	Proteomic Characterization of Specific Minor Proteins in the Human Milk Casein Fraction	http://pubs.acs.org/doi/abs/10.1021/pr200660t	Table 1
2011	Liao	MFGM	Proteomic Characterization of Human Milk Fat Globule Membrane Proteins during a 12 Month Lactation Period	http://pubs.acs.org/doi/abs/10.1021/pr200149t	Table 1
2011	Hettinga	MFGM/Serum	The Host Defense Proteome of Human and Bovine Milk	http://www.plosone.org/article/info%3Adoi%2F10.1371%2Fjournal.pone.0019433	Table 3
2012	Gao	whey	Temporal Changes in Milk Proteomes Reveal Developing Milk Functions	http://pubs.acs.org/doi/full/10.1021/pr3004002	Supplementary Table 1
2012	Picariello	MFGM/whey	Gel-free shotgun proteomic analysis of human milk	http://www.sciencedirect.com/science/article/pii/S0021967312000775	Table 1
2012	Molinari	skim	Proteome Mapping of Human Skim Milk Proteins in Term and Preterm Milk	http://pubs.acs.org/doi/full/10.1021/pr2008797	Table 1
2013	Mange	skim	Elevated Concentrations of Milk β2-Microglobulin Are Associated with Increased Risk of Breastfeeding Transmission of HIV-1 (Vertical Transmission Study)	http://pubs.acs.org/doi/full/10.1021/pr400578h	Supplementary File pr400578h_si_003.xlsx
2013	Zhang	whey	Quantitative Analysis of the Human Milk Whey Proteome Reveals Developing Milk and Mammary-Gland Functions across the First Year of Lactation	http://www.mdpi.com/2227-7382/1/2/128/htm	Supplementary Dataset 1
2015	Beck	whole	Comparative Proteomics of Human and Macaque Milk Reveals Species-Specific Nutrition During Post-Natal Development	http://pubs.acs.org/action/doSearch?text1=beck+milk&field1=AllField	Additional File 4
